# Supplementary material
Source: PubMed Central journal article supplement (PMC3812936)

# Desymmetrization of *meso*-2,5-Diallylpyrrolidiny Ureas via Asymmetric Pd-Catalyzed Carboamination Reactions. Stereocontrolled Synthesis of Bicyclic Ureas.

Nicholas R. Babij, and John P. Wolfe\*

Department of Chemistry, University of Michigan, 930 N. University Avenue, Ann Arbor, Michigan 48109-1055

## Supporting Information

Experimental procedures and characterization data for new compounds in Tables 1–2, Schemes 2–3, and Equation 1.

### Table of Contents

|                                                                                                                  |     |
|------------------------------------------------------------------------------------------------------------------|-----|
| General Considerations                                                                                           | S1  |
| Preparation and Characterization of <i>meso</i> - <i>N</i> -Aryl-2,5-Diallylpyrrolidine-1-Carboxamide Substrates | S2  |
| Preparation and Characterization of Bicyclic Urea Products                                                       | S7  |
| Deprotection of Bicyclic Urea Product <b>8c</b>                                                                  | S22 |
| Conversion of Bicyclic Urea Product <b>8c</b> to Tricyclic Guanidine <b>12</b>                                   | S23 |
| Conversion of Bicyclic Urea Product <b>8c</b> to 9- <i>epi</i> -Batzelladine K <b>16</b>                         | S25 |
| Assignment of Stereochemistry                                                                                    | S28 |
| References                                                                                                       | S34 |
| Copies of NMR Spectra and HPLC traces                                                                            | S35 |

**General:** All reactions were carried out under a nitrogen atmosphere in flame-dried glassware unless otherwise noted. Tris(dibenzylidene)acetone dipalladium, tri(2-furyl)phosphine, and (*S*)-Siphos-PE were purchased from Strem Chemical Co. and used without purification. Tricyclohexylphosphonium tetrafluoroborate was purchased from Acros Chemical Co. and used without further purification. 2-Di-*tert*-butylphosphino-3,4,5,6-tetramethyl-2',4',6'-triisopropyl-1,1'-biphenyl was purchased from Sigma-Aldrich and used without further purification. All other reagents were obtained from commercial sources and were used as obtained unless otherwise noted. NaOtBu and CuCl were stored in the glove box and removed prior to use. BF<sub>3</sub>OEt<sub>2</sub> and POCl<sub>3</sub> were purified by distillation under N<sub>2</sub> prior to use. (*Z*)-1-bromobutene<sup>[1]</sup> was prepared according to a slight modification of a literature procedure; the preparation was conducted at rt instead of using microwave heating. (*Z*)-1-bromohexene<sup>[2]</sup> and (*E*)-1-bromohexene<sup>[2]</sup> were prepared according to published procedures. Toluene, THF, diethyl ether and dichloromethane

were purified using a GlassContour solvent purification system. Yields refer to isolated yields of compounds estimated to be  $\geq 95\%$  pure as determined by  $^1\text{H}$  NMR analysis unless otherwise noted. The yields reported in the supporting information describe the result of a single experiment, whereas yields reported in Tables 1–2, Scheme 2, and Equation 1 are average yields of two or more experiments. Thus, the yields reported in the supporting information may differ from those shown in Tables 1–2, Scheme 2, and Equation 1. Structural and stereochemical assignments were made on the basis of 2-D COSY, and NOESY experiments. Ratios of diastereomers were determined by  $^1\text{H}$  NMR analysis. The reported optical rotation values refer to measurements taken of the isolated mixtures of diastereomers upon which chemical yields were based. Ratios of enantiomers were determined by HPLC analysis. Although diastereomers were not easily separable by chromatography, for most examples (with the exception of **8i** and **8j**) it was possible to separate small amounts of the pure ( $>20:1$  dr) major diastereomer for chiral HPLC analysis.

### Preparation and Characterization of *meso*-*N*-Aryl-2,5-Diallylpyrrolidine-1-Carboxamide Substrates

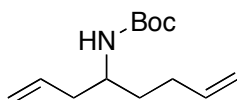

( $\pm$ )-*tert*-Butyl octa-1,7-dien-4-ylcarbamate (**S1**). The title compound was prepared by modifying a procedure published by Veenstra.<sup>[31]</sup> A flame-dried flask was cooled under a stream of  $\text{N}_2$ , charged with dichloromethane (60 mL) and cooled to  $0\text{ }^\circ\text{C}$ . Pent-4-enal (2.96 mL, 30 mmol), allyltrimethylsilane (4.77 mL, 30 mmol) and *tert*-butyl carbamate (3.5 g, 30 mmol) were added to the flask and the resulting solution was stirred for 15 min at  $0\text{ }^\circ\text{C}$ . Distilled  $\text{BF}_3\text{OEt}_2$  (2.3 mL, 18 mmol) was added and the reaction mixture was stirred for 30 min at  $0\text{ }^\circ\text{C}$ . The mixture was gradually warmed to rt and stirred for 30 min. The reaction was then quenched with saturated aqueous  $\text{NaHCO}_3$  (20 mL) and stirred for 5 min at rt. The mixture was transferred to a separatory funnel and the layers were separated. The organic layer was washed with saturated aqueous  $\text{NaHCO}_3$  (20 mL) and then the combined aqueous layers were extracted with dichloromethane (15 mL). The combined organic layers were dried over anhydrous sodium sulfate, filtered, and concentrated *in vacuo*. The crude material was purified by flash chromatography on silica gel to afford 3.8 g (56%) of the title compound as a clear colorless oil. This compound was found to exist as a mixture of rotamers as judged by  $^1\text{H}$  and  $^{13}\text{C}$  NMR analysis; data are for the mixture.  $^1\text{H}$  NMR (500 MHz,  $\text{CDCl}_3$ )  $\delta$  5.84–5.73 (m, 2 H), 5.10–4.95

(m, 4 H), 4.33 (d, br,  $J = 7.5$  Hz, 1 H), 3.66 (d, br,  $J = 4.5$  Hz, 1 H), 2.26–2.07 (m, 4 H), 1.60–1.55 (m, 1 H), 1.48–1.40 (m, 1 H), 1.43 (s, 9 H);  $^{13}\text{C}$  NMR (175 MHz,  $\text{CDCl}_3$ )  $\delta$  155.5, 138.0, 134.4, 117.7, 114.9, 79.0, 49.6, 39.5, 33.9, 30.2, 28.4; IR (film) 3337, 1684  $\text{cm}^{-1}$ . MS (ESI) 248.1621 (248.1621 calcd for  $\text{C}_{13}\text{H}_{23}\text{NO}_2$ ,  $\text{M} + \text{Na}^+$ ).

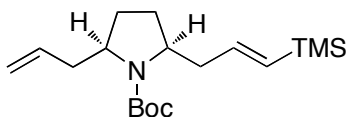

**(±)-(E,2R\*,5S\*)-tert-Butyl 2-allyl-5-[3-(trimethylsilyl)allyl]pyrrolidine-1-carboxylate (S2).** A flame-dried Schlenk flask was cooled under a stream of  $\text{N}_2$  and charged with  $\text{Pd}_2(\text{dba})_3$  (81 mg, 0.089 mmol), tri(2-furyl)phosphine (82 mg, 0.36 mmol) and  $\text{NaOtBu}$  (853 mg, 8.9 mmol). The flask was purged with  $\text{N}_2$ , then a solution of **S1** (1.0 g, 4.4 mmol) in freshly distilled xylenes (22.2 mL) was added via syringe and the resulting mixture was stirred at rt for 5 min. (E)-(2-bromovinyl)trimethylsilane (1.36 mL, 8.9 mmol) was added and the flask was heated to 137 °C and stirred overnight (ca. 14 h). The mixture was cooled to room temperature and saturated aqueous  $\text{NH}_4\text{Cl}$  (10 mL) and ethyl acetate (10 mL) were added. The layers were separated, the organic layer was filtered through a plug of silica gel, and the silica gel was washed with ethyl acetate (20 mL). The filtrate was dried over anhydrous sodium sulfate, filtered, and concentrated *in vacuo*. The crude material was purified by flash chromatography on silica gel to afford 1.11 g (77%) of the title compound as a dark red-brown oil. This compound was found to exist as a mixture of rotamers as judged by  $^1\text{H}$  and  $^{13}\text{C}$  NMR analysis; data are for the mixture.  $^1\text{H}$  NMR (500 MHz,  $\text{CDCl}_3$ )  $\delta$  5.98–5.92 (m, 1 H), 5.78–5.70 (m, 1 H), 5.68 (d,  $J = 18.5$  Hz, 1 H), 5.06–5.01 (m, 2 H), 3.92–3.68 (m, 2 H), 2.64–2.41 (m, 2 H), 2.34 (dt,  $J = 8.0, 13.0$  Hz, 1 H), 2.09 (dt,  $J = 8.0, 13.0$  Hz, 1 H), 1.87–1.82 (m, 2 H), 1.68–1.64 (m, 2 H), 1.46 (s, 9 H), 0.03 (s, 9 H);  $^{13}\text{C}$  NMR (125 MHz,  $\text{CDCl}_3$ )  $\delta$  154.7, 143.2, 135.4, 132.9, 116.8, 79.0, 58.0, 57.9, 42.1, 42.0, 40.0, 39.8, 28.5, –1.2; IR (film) 1692  $\text{cm}^{-1}$ . MS (ESI) 346.2174 (346.2173 calcd for  $\text{C}_{18}\text{H}_{33}\text{NO}_2\text{Si}$ ,  $\text{M} + \text{Na}^+$ ).

**General Procedure for Synthesis of meso-N-Aryl-2,5-Diallylpyrrolidine-1-Carboxamide Substrates 7.** A round-bottom flask equipped with a stirbar was charged with **S2** (1.0 equiv) and dichloromethane (0.2 M). Trifluoroacetic acid (1.0 M) was added to the flask and the mixture was heated to reflux and stirred overnight. The solution was cooled to rt, diluted with water, basified with  $\text{NH}_4\text{OH}$  to  $\text{pH} > 12$ , and transferred to a separatory funnel. The layers were separated and the aqueous layer was extracted with  $\text{CH}_2\text{Cl}_2$  (3 x 10 mL). The combined organic layers were dried over anhydrous sodium sulfate, filtered, and concentrated *in vacuo*. The crude

product was dissolved in dichloromethane (0.2 M) and the appropriate isocyanate (1.1 equiv) was added. The reaction mixture was stirred at rt until starting material had been completely consumed as judged by TLC analysis (ca. 1 h). The crude reaction mixture was concentrated *in vacuo*, and purified by flash chromatography on silica gel.

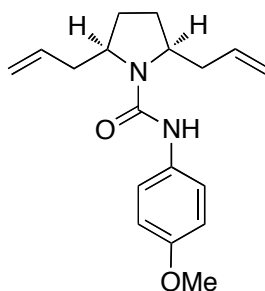

**(2S,5R)-2,5-Diallyl-N-(4-methoxyphenyl)pyrrolidine-1-carboxamide (7a).** The title compound was prepared from **S2** (2.13 g, 6.6 mmol) and 4-methoxyphenyl isocyanate (940  $\mu\text{L}$ , 7.3 mmol) in two steps via the general procedure described above. This procedure afforded 1.2 g (61%) of the title compound as a white solid: mp = 63–65  $^{\circ}\text{C}$ .  $^1\text{H}$  NMR (700 MHz,  $\text{CDCl}_3$ )  $\delta$  7.25 (d,  $J$  = 8.4 Hz, 2 H), 6.82 (d,  $J$  = 9.1 Hz, 2 H), 6.33 (s, 1H), 5.91–5.85 (m, 2 H), 5.20–5.15 (m, 4 H), 3.99–3.96 (m, 2 H), 3.77 (s, 3 H), 2.55 (dt,  $J$  = 14.0, 7.0 Hz, 2 H), 2.24 (dt,  $J$  = 7.0, 14.0 Hz, 2 H), 2.02–1.97 (m, 2 H), 1.78–1.74 (m, 2 H);  $^{13}\text{C}$  NMR (175 MHz,  $\text{CDCl}_3$ )  $\delta$  155.5, 155.2, 135.2, 132.3, 121.4, 118.0, 114.1, 58.8, 55.5, 40.2, 29.5; IR (film) 3311, 1635  $\text{cm}^{-1}$ . MS (ESI) 301.1917 (301.1911 calcd for  $\text{C}_{18}\text{H}_{24}\text{N}_2\text{O}_2$ ,  $\text{M} + \text{H}^+$ ).

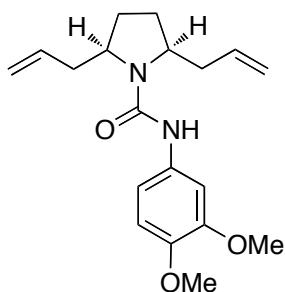

**(2S,5R)-2,5-Diallyl-N-(3,4-dimethoxyphenyl)pyrrolidine-1-carboxamide (7b).** The title compound was prepared from **S2** (965 mg, 2.98 mmol) and 3,4-dimethoxyphenyl isocyanate (488  $\mu\text{L}$ , 3.3 mmol) in two steps via the general procedure described above. This procedure afforded 542 mg (55%) of the title compound as a tan solid: mp = 112–114  $^{\circ}\text{C}$ .  $^1\text{H}$  NMR (500 MHz,  $\text{CDCl}_3$ )  $\delta$  7.27 (d,  $J$  = 2.1 Hz, 1 H), 6.77 (d,  $J$  = 8.4 Hz, 1 H), 6.62 (dd,  $J$  = 2.8, 8.4 Hz, 1 H), 6.36 (s, 1H), 5.91–5.86 (m, 2 H), 5.21–5.16 (m, 4 H), 4.01–3.97 (m, 2 H), 3.88 (s, 3 H), 3.84 (s, 3 H), 2.57 (dt,  $J$  = 6.3, 13.3 Hz, 2 H), 2.25 (dt,  $J$  = 7.7, 13.3 Hz, 2 H), 2.03–1.99 (m, 2 H),



1.79–1.75 (m, 2 H);  $^{13}\text{C}$  NMR (175 MHz,  $\text{CDCl}_3$ )  $\delta$  155.1, 149.1, 144.8, 135.2, 133.0, 118.1, 111.4, 110.9, 104.7, 58.7, 56.2, 55.9, 40.2, 29.5; IR (film) 3327, 1635  $\text{cm}^{-1}$ . MS (ESI) 331.2018 (331.2016 calcd for  $\text{C}_{19}\text{H}_{26}\text{N}_2\text{O}_3$ ,  $\text{M} + \text{H}^+$ ).

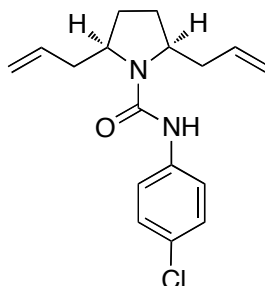

**(2S,5R)-2,5-Diallyl-N-(4-chlorophenyl)pyrrolidine-1-carboxamide (7c).** The title compound was prepared from **S2** (1.05 g, 3.2 mmol) and 4-chlorophenyl isocyanate (541 mg, 3.5 mmol) in two steps via the general procedure described above. This procedure afforded 574 mg (58%) of the title compound as a white solid: mp = 91–93 °C.  $^1\text{H}$  NMR (500 MHz,  $\text{CDCl}_3$ )  $\delta$  7.30 (d,  $J$  = 9.0 Hz, 2 H), 7.21 (d,  $J$  = 9.0 Hz, 2 H), 6.51 (s, 1H), 5.91–5.85 (m, 2 H), 5.22–5.16 (m, 4 H), 4.00–3.95 (m, 2 H), 2.55 (dt,  $J$  = 14.0, 6.5 Hz, 2 H), 2.25 (dt,  $J$  = 14.0, 7.5 Hz, 2 H), 2.03–1.97 (m, 2 H), 1.79–1.74 (m, 2 H);  $^{13}\text{C}$  NMR (125 MHz,  $\text{CDCl}_3$ )  $\delta$  154.5, 137.9, 135.1, 128.7, 127.4, 120.3, 118.3, 58.9, 40.1, 29.6; IR (film) 3318, 1640  $\text{cm}^{-1}$ . MS (ESI) 327.1242 (327.1235 calcd for  $\text{C}_{17}\text{H}_{21}\text{ClN}_2\text{O}$ ,  $\text{M} + \text{Na}^+$ ).

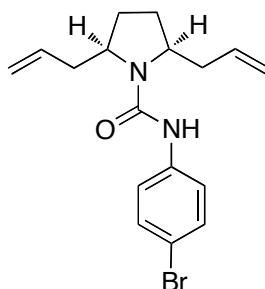

**(2S,5R)-2,5-Diallyl-N-(4-bromophenyl)pyrrolidine-1-carboxamide (7d).** The title compound was prepared from **S2** (1.2 g, 3.7 mmol) and 4-bromophenyl isocyanate (806 mg, 4.1 mmol) in two steps via the general procedure described above. This procedure afforded 827 mg (64%) of the title compound as a off-white solid: mp = 101–104 °C.  $^1\text{H}$  NMR (700 MHz,  $\text{CDCl}_3$ )  $\delta$  7.37 (d,  $J$  = 7.7 Hz, 2 H), 7.25 (d,  $J$  = 7.7 Hz, 2 H), 6.49 (s, 1H), 5.91–5.85 (m, 2 H), 5.21–5.17 (m, 4 H), 3.99–3.97 (m, 2 H), 2.55 (dt,  $J$  = 6.3, 14.0 Hz, 2 H), 2.25 (dt,  $J$  = 7.0, 14.0 Hz, 2 H), 2.03–1.99 (m, 2 H), 1.80–1.77 (m, 2 H);  $^{13}\text{C}$  NMR (175 MHz,  $\text{CDCl}_3$ )  $\delta$  154.5, 138.4, 135.1, 131.7, 120.7,

118.3, 115.0, 58.9, 40.1, 29.6; IR (film) 3316, 1635  $\text{cm}^{-1}$ . MS (ESI) 349.0912 (349.0910 calcd for  $\text{C}_{17}\text{H}_{21}\text{BrN}_2\text{O}$ ,  $\text{M} + \text{H}^+$ ).

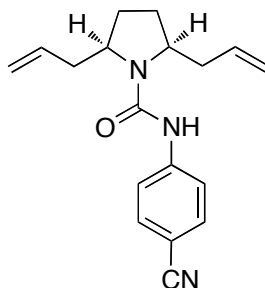

**(2S,5R)-2,5-Diallyl-N-(4-cyanophenyl)pyrrolidine-1-carboxamide (7e).** The title compound was prepared from **S2** (1.12 g, 3.46 mmol) and 4-cyanophenyl isocyanate (549 mg, 3.81 mmol) in two steps via the general procedure described above. This procedure afforded 613 mg (60%) of the title compound as a off-white solid: mp = 76–79 °C.  $^1\text{H}$  NMR (700 MHz,  $\text{CDCl}_3$ )  $\delta$  7.36 (d,  $J = 7.7$  Hz, 2 H), 7.25 (d,  $J = 7.7$  Hz, 2 H), 6.49 (s, 1H), 5.92–5.86 (m, 2 H), 5.21–5.17 (m, 4 H), 4.02–3.96 (m, 2 H), 2.55 (dt,  $J = 6.3, 14.0$  Hz, 2 H), 2.25 (dt,  $J = 7.0, 14.0$  Hz, 2 H), 2.03–1.99 (m, 2 H), 1.80–1.77 (m, 2 H);  $^{13}\text{C}$  NMR (175 MHz,  $\text{CDCl}_3$ )  $\delta$  153.9, 143.5, 135.0, 133.1, 119.2, 118.6, 118.6, 105.1, 59.1, 39.9, 29.6; IR (film) 3365, 1652  $\text{cm}^{-1}$ . MS (ESI) 296.1756 (296.1757 calcd for  $\text{C}_{18}\text{H}_{21}\text{N}_3\text{O}$ ,  $\text{M} + \text{H}^+$ ).

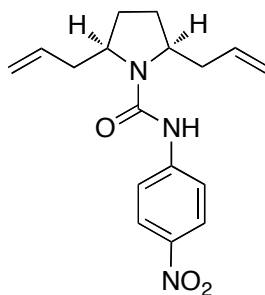

**(2S,5R)-2,5-Diallyl-N-(4-nitrophenyl)pyrrolidine-1-carboxamide (7f).** The title compound was prepared from **S2** (660 mg, 2.04 mmol) and 4-nitrophenyl isocyanate (368 mg, 2.24 mmol) in two steps via the general procedure described above. This procedure afforded 366 mg (57%) of the title compound as a pale-yellow solid: mp = 96–97 °C.  $^1\text{H}$  NMR (700 MHz,  $\text{CDCl}_3$ )  $\delta$  8.15 (d,  $J = 9.1$  Hz, 2 H), 7.50 (d,  $J = 9.1$  Hz, 2 H), 6.93 (s, 1H), 5.94–5.88 (m, 2 H), 5.25–5.21 (m, 4 H), 4.04–4.01 (m, 2 H), 2.56 (dt,  $J = 7.0, 13.3$  Hz, 2 H), 2.29 (dt,  $J = 7.0, 14.0$  Hz, 2 H), 2.07–2.03 (m, 2 H), 1.83–1.79 (m, 2 H);  $^{13}\text{C}$  NMR (175 MHz,  $\text{CDCl}_3$ )  $\delta$  153.7, 145.5, 142.2, 135.0, 125.1,

118.8, 117.8, 59.2, 39.9, 29.7; IR (film) 3331, 1652  $\text{cm}^{-1}$ . MS (ESI) 316.1656 (316.1656 calcd for  $\text{C}_{17}\text{H}_{21}\text{N}_3\text{O}_3$ ,  $\text{M} + \text{H}^+$ ).

## Preparation and Characterization of Bicyclic Urea Products

**General Procedure for Synthesis of Racemic Bicyclic Ureas (for HPLC assays).** A flame-dried Schlenk tube was cooled under vacuum and charged with the appropriate *meso-N*-aryl-2,5-diallylpyrrolidine-1-carboxamide substrate (1.0 equiv),  $\text{Pd}_2(\text{dba})_3$  (0.02 equiv),  $\text{PCy}_3\text{:HBF}_4$  (0.08 equiv), and  $\text{NaOtBu}$  (1.5 equiv). The flask was evacuated and purged with  $\text{N}_2$ . Toluene (0.2 M) was added via syringe and the resulting mixture was stirred at rt for 2 min. The appropriate aryl or alkenyl bromide (1.5 equiv) was added and the tube was heated to 100 °C and stirred for 2 h. The mixture was cooled to room temperature and saturated aqueous  $\text{NH}_4\text{Cl}$  (5 mL/mmol substrate) and ethyl acetate (5 mL/mmol substrate) were added. The layers were separated, the organic layer was filtered through a plug of silica gel, and the silica gel was washed with ethyl acetate (5 mL/mmol substrate). The filtrate was dried over anhydrous sodium sulfate, filtered, and concentrated *in vacuo*. The crude material was purified by flash chromatography on silica gel.

## General Procedure for Synthesis of Enantiomerically-Enriched Bicyclic Ureas

A flame-dried Schlenk tube was cooled under vacuum and charged with the appropriate *meso-N*-aryl-2,5-diallylpyrrolidine-1-carboxamide substrate (1.0 equiv),  $\text{Pd}_2(\text{dba})_3$  (0.02 equiv), (S)-Siphos-PE (0.08 equiv), and  $\text{NaOtBu}$  or  $\text{NaOMe}$  (1.5 equiv). The flask was evacuated and purged with  $\text{N}_2$ . Toluene (0.2 M) was added via syringe and the resulting mixture was stirred at rt for 2 min. The appropriate aryl or alkenyl bromide (1.5 equiv) was added and the tube was heated to 100 °C. The solution was stirred for 2 h or until the starting material was completely consumed as judged by TLC analysis. The mixture was cooled to room temperature and saturated aqueous  $\text{NH}_4\text{Cl}$  (5 mL/mmol substrate) and ethyl acetate (5 mL/mmol substrate) were added. 6 M  $\text{HCl}$  was used instead of  $\text{NH}_4\text{Cl}$  to remove aniline side products if column chromatography could not separate the desired product from aniline side products. The layers were separated, the organic layer was filtered through a plug of silica gel, and the silica gel was washed with ethyl acetate (5 mL/mmol substrate). The filtrate was dried over anhydrous sodium sulfate, filtered, and concentrated *in vacuo*. The crude material was purified by flash chromatography on silica gel.

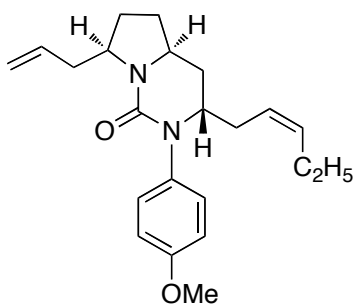

**(+)-(Z,3S,4aS,7R)-7-Allyl-2-(4-methoxyphenyl)-3-(pent-2-en-1-yl)hexahydropyrrolo[1,2-c]pyrimidin-1(2H)-one (8a).** The general procedure was employed for the coupling of **7a** (60 mg, 0.2 mmol) and (Z)-1-bromobut-1-ene (150  $\mu$ L, 0.3 mmol, 2.0 M solution in toluene), using a catalyst composed of Pd<sub>2</sub>dba<sub>3</sub> (3.7 mg, 0.004 mmol), and (S)-Siphos-PE (8 mg, 0.016 mmol). This procedure afforded 48 mg (68%) of the title compound as a brown oil and as a 7:1 mixture of diastereomers as determined by <sup>1</sup>H NMR analysis: [ $\alpha$ ]<sub>D</sub><sup>23</sup> +9.5 (c 4.3, CH<sub>2</sub>Cl<sub>2</sub>). Data are for the major isomer. <sup>1</sup>H NMR (700 MHz, CDCl<sub>3</sub>)  $\delta$  7.14 (d, *J* = 8.4 Hz, 2 H), 6.88 (d, *J* = 8.4 Hz, 2 H), 5.77–5.71 (m, 1 H), 5.43 (dt, *J* = 7.0, 11.2 Hz, 1 H), 5.12–5.08 (m, 1 H), 5.03 (d, *J* = 17.5 Hz, 1 H), 5.00 (d, *J* = 9.8 Hz, 1 H), 3.99 (dt, *J* = 2.1, 9.1 Hz, 1 H), 3.82–3.78 (m, 1 H), 3.79 (s, 3 H), 3.65 (ddt, *J* = 2.1, 4.9, 11.2 Hz, 1 H), 2.80 (dd, *J* = 5.6, 13.3 Hz, 1 H), 2.29–2.27 (m, 1 H), 2.18–2.15 (m, 2 H), 2.08 (dt, *J* = 8.4, 13.3 Hz, 1 H) 1.99–1.88 (m, 4 H), 1.83 (dd, *J* = 6.3, 12.6 Hz, 1 H) 1.68–1.60 (m, 2 H), 0.89 (t, *J* = 7.7 Hz, 3 H); <sup>13</sup>C NMR (175 MHz, CDCl<sub>3</sub>)  $\delta$  157.6, 154.2, 135.8, 135.1, 134.6, 129.3, 124.2, 116.8, 114.1, 58.3, 57.3, 55.4, 52.7, 37.8, 31.3, 31.0, 30.9, 27.8, 20.7, 14.0; IR (film) 1642 cm<sup>-1</sup>. MS (ESI) 355.2382 (355.2380 calcd for C<sub>22</sub>H<sub>30</sub>N<sub>2</sub>O<sub>2</sub>, M + H<sup>+</sup>). The enantiopurity was determined to be 86:14 er by chiral HPLC analysis (chiralcel ADH, 25 cm x 4.6 mm, 2.5% IPA/Hexanes, 0.75 mL/min,  $\lambda$  245 nm, RT= 44.2 and 49.1 min).

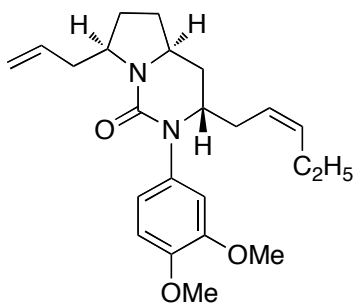

**(+)-(Z,3S,4aS,7R)-7-Allyl-2-(3,4-dimethoxyphenyl)-3-(pent-2-en-1-yl)hexahydropyrrolo[1,2-c]pyrimidin-1(2H)-one (8b).** The general procedure was employed for the coupling of **7b** (66 mg, 0.2 mmol) and (Z)-1-bromobut-1-ene (150  $\mu$ L, 0.3 mmol, 2.0 M solution in toluene), using a catalyst composed of Pd<sub>2</sub>dba<sub>3</sub> (3.7 mg, 0.004 mmol), and (S)-Siphos-PE (8 mg, 0.016 mmol). This procedure afforded 30 mg (39%) of the title compound as a brown oil and as a 7:1 mixture

of diastereomers as determined by  $^1\text{H}$  NMR analysis:  $[\alpha]_D^{23} +7.0$  (c 2.9,  $\text{CH}_2\text{Cl}_2$ ). Data are for the major isomer.  $^1\text{H}$  NMR (700 MHz,  $\text{CDCl}_3$ )  $\delta$  6.83 (d,  $J = 8.4$  Hz, 1 H), 6.78–6.77 (m, 2 H), 5.77–5.71 (m, 1 H), 5.44 (dt,  $J = 7.0, 10.5$  Hz, 1 H) 5.13–5.09 (m, 1 H), 5.03 (d,  $J = 16.8$  Hz, 1 H), 5.00 (d,  $J = 10.5$  Hz, 1 H), 4.01 (dt,  $J = 2.8, 9.1$  Hz, 1 H), 3.86 (s, 6 H), 3.85–3.81 (m, 1 H), 3.66 (ddt,  $J = 2.1, 5.6, 11.2$  Hz, 1 H), 2.80 (dd,  $J = 5.6, 12.6$  Hz, 1 H), 2.30–2.28 (m, 1 H), 2.18–2.15 (m, 2 H), 2.07 (dt,  $J = 8.4, 13.3$  Hz, 1 H) 2.00–1.96 (m, 1 H), 1.93–1.87 (m, 3 H), 1.83 (dd,  $J = 7.0, 12.6$  Hz, 1 H) 1.69–1.63 (m, 2 H), 0.89 (t,  $J = 7.7$  Hz, 3 H);  $^{13}\text{C}$  NMR (175 MHz,  $\text{CDCl}_3$ )  $\delta$  154.1, 148.9, 147.2, 135.8, 135.4, 134.7, 124.2, 120.1, 116.8, 112.3, 111.1, 58.5, 57.3, 56.0, 55.9, 52.7, 37.8, 31.3, 31.1, 30.9, 27.7, 20.7, 14.1; IR (film)  $1641\text{ cm}^{-1}$ . MS (ESI) 385.2486 (385.2486 calcd for  $\text{C}_{23}\text{H}_{32}\text{N}_2\text{O}_3$ ,  $\text{M} + \text{H}^+$ ). The enantiopurity was determined to be 82:18 er by chiral HPLC analysis (chiralcel ADH, 25 cm x 4.6 mm, 5% IPA/Hexanes, 0.75 mL/min,  $\lambda$  205 nm, RT= 20.4 and 23.5 min).

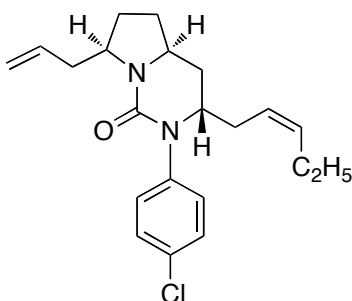

**(-)-(Z,3S,4aS,7R)-7-Allyl-2-(4-chlorophenyl)-3-(pent-2-en-1-yl)hexahydropyrrolo[1,2-c]pyrimidin-1(2H)-one (8c).** The general procedure was employed for the coupling of **7c** (305 mg, 1.0 mmol) and (Z)-1-bromobut-1-ene (750  $\mu\text{L}$ , 1.5 mmol, 2.0 M solution in toluene), using a catalyst composed of  $\text{Pd}_2\text{dba}_3$  (18.3 mg, 0.02 mmol), and (S)-Siphos-PE (40.4 mg, 0.08 mmol). This procedure afforded 288 mg (80%) of the title compound as a yellow oil:  $[\alpha]_D^{23} -14.3$  (c 5.3,  $\text{CH}_2\text{Cl}_2$ ).  $^1\text{H}$  NMR (700 MHz,  $\text{CDCl}_3$ )  $\delta$  7.31 (d,  $J = 8.4$  Hz, 2 H), 7.19 (d,  $J = 8.4$  Hz, 2 H), 5.77–5.71 (m, 1 H), 5.45 (dt,  $J = 7.0, 10.5$  Hz, 1 H), 5.12–5.08 (m, 1 H), 5.04 (d,  $J = 16.8$  Hz, 1 H), 5.01 (d,  $J = 10.5$  Hz, 1 H), 4.01 (dt,  $J = 2.8, 9.1$  Hz, 1 H), 3.90 (dt,  $J = 4.2, 10.5$  Hz, 1 H), 3.66 (ddt,  $J = 2.1, 4.9, 11.2$  Hz, 1 H), 2.78 (dd,  $J = 5.6, 12.6$  Hz, 1 H), 2.23–2.15 (m, 3 H), 2.07 (dt,  $J = 9.1, 13.3$  Hz, 1 H) 1.99 (dt,  $J = 6.3, 11.2$  Hz, 1 H), 1.93–1.88 (m, 3 H), 1.84 (dd,  $J = 6.3, 12.6$  Hz, 1 H) 1.69–1.64 (m, 2 H), 0.90 (t,  $J = 7.7$  Hz, 3 H);  $^{13}\text{C}$  NMR (175 MHz,  $\text{CDCl}_3$ )  $\delta$  153.7, 140.8, 135.6, 134.9, 131.2, 129.3, 128.9, 123.8, 117.0, 58.0, 57.4, 52.8, 37.7, 31.3, 31.0, 30.9, 27.8, 20.7, 14.0; IR (film)  $1643\text{ cm}^{-1}$ . MS (ESI) 359.1887 (359.1885 calcd for  $\text{C}_{21}\text{H}_{27}\text{ClN}_2\text{O}$ ,  $\text{M} +$

H<sup>+</sup>). The enantiopurity was determined to be 95:5 er by chiral HPLC analysis (chiralcel ADH, 25 cm x 4.6 mm, 5% IPA/Hexanes, 0.75 mL/min,  $\lambda$  190 nm, RT= 13.4 and 18.1 min).

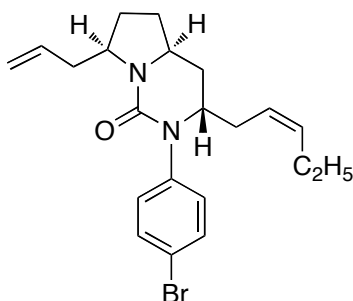

**(-)-(Z,3S,4aS,7R)-7-Allyl-2-(4-bromophenyl)-3-(pent-2-en-1-yl)hexahydropyrrolo[1,2-c]pyrimidin-1(2H)-one (8d).** The general procedure was employed for the coupling of **7d** (70 mg, 0.2 mmol) and (Z)-1-bromobut-1-ene (150  $\mu$ L, 0.3 mmol, 2.0 M solution in toluene), using a catalyst composed of Pd<sub>2</sub>dba<sub>3</sub> (3.7 mg, 0.004 mmol), and (S)-Siphos-PE (8 mg, 0.016 mmol). This procedure afforded 15 mg (18%) of the title compound as a brown oil and as a 18:1 mixture of diastereomers as determined by <sup>1</sup>H NMR analysis: [ $\alpha$ ]<sub>D</sub><sup>23</sup> -21.1 (c 0.5, CH<sub>2</sub>Cl<sub>2</sub>). This material also contained ca. 20% of an unidentified side product. Data are for the major isomer. <sup>1</sup>H NMR (700 MHz, CDCl<sub>3</sub>)  $\delta$  7.46 (d, *J* = 8.4 Hz, 2 H), 7.14 (d, *J* = 8.4 Hz, 2 H), 5.77–5.71 (m, 1 H), 5.45 (dt, *J* = 7.0, 11.2 Hz, 1 H), 5.12–5.08 (m, 1 H), 5.04 (d, *J* = 17.5 Hz, 1 H), 5.01 (d, *J* = 10.5 Hz, 1 H), 4.01 (dt, *J* = 2.8, 8.4 Hz, 1 H), 3.90 (dt, *J* = 4.9, 10.5 Hz, 1 H), 3.66 (ddt, *J* = 2.8, 5.6, 11.2 Hz, 1 H), 2.78 (dd, *J* = 5.6, 12.6 Hz, 1 H), 2.23–2.15 (m, 3 H), 2.07 (dt, *J* = 8.4, 13.3 Hz, 1 H), 1.99 (dt, *J* = 5.6, 11.9 Hz, 1 H), 1.95–1.88 (m, 3 H), 1.84 (dd, *J* = 6.3, 12.6 Hz, 1 H), 1.69–1.63 (m, 2 H), 0.90 (t, *J* = 7.7 Hz, 3 H); <sup>13</sup>C NMR (175 MHz, CDCl<sub>3</sub>)  $\delta$  153.6, 141.4, 135.6, 134.9, 131.9, 129.7, 123.8, 119.2, 117.0, 57.9, 57.4, 52.7, 37.7, 31.3, 31.0, 30.8, 27.7, 20.7, 14.0; IR (film) 1645 cm<sup>-1</sup>. MS (ESI) 403.1379 (403.1380 calcd for C<sub>21</sub>H<sub>27</sub>BrN<sub>2</sub>O, M + H<sup>+</sup>). The enantiopurity was determined to be 95:5 er by chiral HPLC analysis (chiralcel ADH, 25 cm x 4.6 mm, 5% IPA/Hexanes, 0.75 mL/min,  $\lambda$  205 nm, RT= 14.5 and 20.0 min).

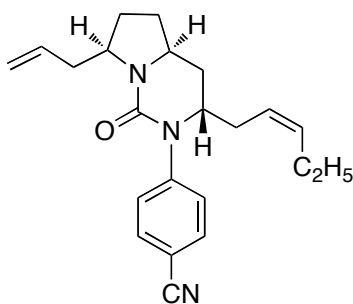

**(-)-4-[(Z,3S,4aS,7R)-7-Allyl-1-oxo-3-(pent-2-en-1-yl)hexahydropyrrolo[1,2-c]pyrimidin-2(1H)-yl]benzonitrile (8e).** The general procedure was employed for the coupling of **7e** (59 mg, 0.2 mmol) and (Z)-1-bromobut-1-ene (150  $\mu$ L, 0.3 mmol, 2.0 M solution in toluene), using a catalyst composed of Pd<sub>2</sub>dba<sub>3</sub> (3.7 mg, 0.004 mmol), and (S)-Siphos-PE (8 mg, 0.016 mmol). This procedure afforded 29 mg (41%) of the title compound as a brown oil and as a 17:1 mixture of diastereomers as determined by <sup>1</sup>H NMR analysis: [ $\alpha$ ]<sub>D</sub><sup>23</sup> -71.0 (c 2.9, CH<sub>2</sub>Cl<sub>2</sub>). This material also contained ca. 5% of 4-aminobenzonitrile. Data are for the major isomer. <sup>1</sup>H NMR (700 MHz, CDCl<sub>3</sub>)  $\delta$  7.62 (d, *J* = 9.1 Hz, 2 H), 7.39 (d, *J* = 9.1 Hz, 2 H), 5.76–5.71 (m, 1 H), 5.45 (dt, *J* = 7.0, 11.2 Hz, 1 H), 5.12–5.08 (m, 1 H), 5.04 (d, *J* = 16.1 Hz, 1 H), 5.02 (d, *J* = 9.1 Hz, 1 H), 4.07 (dt, *J* = 4.9, 10.5 Hz, 1 H), 4.02 (dt, *J* = 2.1, 8.4, Hz 1 H), 3.68 (ddt, *J* = 2.1, 5.6, 11.2 Hz, 1 H), 2.76 (dd, *J* = 6.3, 12.6 Hz, 1 H), 2.23 (d, *J* = 12.6 Hz, 1 H), 2.20–2.14 (m, 2 H), 2.06 (dt, *J* = 8.4, 13.3 Hz, 1 H), 2.03–2.00 (m, 1 H), 1.97–1.85 (m, 4 H), 1.71–1.63 (m, 2 H), 0.89 (t, *J* = 7.7 Hz, 3 H); <sup>13</sup>C NMR (175 MHz, CDCl<sub>3</sub>)  $\delta$  153.1, 146.6, 135.3, 135.2, 132.6, 127.8, 123.4, 118.9, 117.2, 108.5, 57.7, 57.4, 52.7, 37.4, 31.4, 31.0, 30.8, 27.7, 20.7, 14.0; IR (film) 1648 cm<sup>-1</sup>. MS (ESI) 350.2227 (350.2227 calcd for C<sub>22</sub>H<sub>27</sub>N<sub>3</sub>O, M + H<sup>+</sup>). The enantiopurity was determined to be 94:6 er by chiral HPLC analysis (chiralcel ADH, 25 cm x 4.6 mm, 5% IPA/Hexanes, 0.75 mL/min,  $\lambda$  205 nm, RT= 33.2 and 42.9 min).

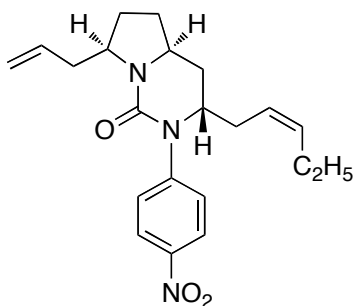

**(-)-(Z,3S,4aS,7R)-7-Allyl-2-(4-nitrophenyl)-3-(pent-2-en-1-yl)hexahydropyrrolo[1,2-c]pyrimidin-1(2H)-one (8f).** A modification of the general procedure was employed for the coupling of **7f** (63 mg, 0.2 mmol) and (Z)-1-bromobut-1-ene (150  $\mu$ L, 0.3 mmol, 2.0 M solution in toluene), using a catalyst composed of Pd<sub>2</sub>dba<sub>3</sub> (3.7 mg, 0.004 mmol), and (S)-Siphos-PE (8

mg, 0.016 mmol). In contrast to the general procedure, this reaction was run overnight (16 h) at 120 °C. This procedure afforded 18 mg (24%) of the title compound as a yellow oil and as a 20:1 mixture of diastereomers as determined by <sup>1</sup>H NMR analysis: [ $\alpha$ ]<sub>D</sub><sup>23</sup> –281.3 (c 1.1, CH<sub>2</sub>Cl<sub>2</sub>). This material also contained ca. 8% of unreacted starting material and ca. 3% of a bicyclic urea side product lacking the butenyl group (tentatively assigned as 7-allyl-3-methyl-2-(4-nitrophenyl)-4a,5,6,7-tetrahydropyrrolo[1,2-c]pyrimidin-1(2*H*)-one). Data are for the major isomer. <sup>1</sup>H NMR (700 MHz, CDCl<sub>3</sub>)  $\delta$  8.21 (d, *J* = 9.1 Hz, 2 H), 7.46 (d, *J* = 9.1 Hz, 2 H), 5.77–5.71 (m, 1 H), 5.46 (dt, *J* = 7.0, 11.2 Hz, 1 H), 5.12 (ddt, *J* = 2.1, 8.4, 17.5 Hz, 1 H), 5.07–5.03 (m, 2 H), 4.15 (dt, *J* = 4.,9 9.8 Hz, 1 H), 4.05 (dt, *J* = 2.8, 9.1 Hz, 1 H), 3.70 (ddt, *J* = 2.8, 5.6, 11.2 Hz, 1 H), 2.78 (dd, *J* = 5.6, 13.3 Hz, 1 H), 2.25 (d, *J* = 13.3 Hz, 1 H), 2.23–2.16 (m, 2 H), 2.10–2.02 (m, 2 H) 1.97–1.87 (m, 4 H), 1.73–1.66 (m, 2 H), 0.90 (t, *J* = 7.7 Hz, 3 H); <sup>13</sup>C NMR (175 MHz, CDCl<sub>3</sub>)  $\delta$  153.0, 148.5, 144.4, 135.3, 135.3, 127.2, 124.1, 123.3, 117.3, 57.8, 57.4, 52.7, 37.3, 31.5, 31.0, 30.8, 27.7, 20.8, 14.0; IR (film) 1649 cm<sup>-1</sup>. MS (ESI) 370.2126 (370.2125 calcd for C<sub>21</sub>H<sub>27</sub>N<sub>3</sub>O<sub>3</sub>, M + H<sup>+</sup>). The enantiopurity was determined to be 96:4 er by chiral HPLC analysis (chiralcel ADH, 25 cm x 4.6 mm, 5% IPA/Hexanes, 1.5 mL/min,  $\lambda$  310 nm, RT= 19.1 and 26.2 min).

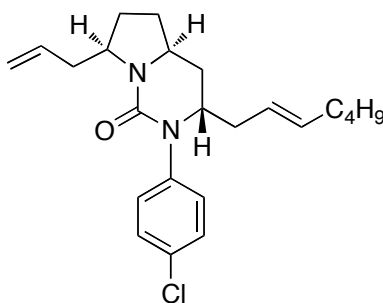

**(–)-(E,3*S*,4*aS*,7*R*)-7-Allyl-2-(4-chlorophenyl)-3-(hept-2-en-1-yl)hexahydropyrrolo[1,2-c]pyrimidin-1(2*H*)-one (8g).** The general procedure was employed for the coupling of **7c** (61 mg, 0.2 mmol) and (*E*)-1-bromohex-1-ene (49 mg, 0.3 mmol), using a catalyst composed of Pd<sub>2</sub>dba<sub>3</sub> (3.7 mg, 0.004 mmol), and (*S*)-Siphos-PE (8 mg, 0.016 mmol). 6 M HCl was used in the workup to remove 4-chloroaniline side product. This procedure afforded 44 mg (57%) of the title compound as a yellow oil: [ $\alpha$ ]<sub>D</sub><sup>23</sup> –30.3 (c 1.9, CH<sub>2</sub>Cl<sub>2</sub>). This material also contained ca. 15% of a regioisomeric bicyclic urea product generated from the coupling of **7c** and 2-bromohex-1-ene (tentatively assigned as (3*S*,4*aS*,7*R*)-7-allyl-2-(4-chlorophenyl)-3-(2-methylenehexyl)hexahydropyrrolo[1,2-c]pyrimidin-1(2*H*)-one). Data are for the major isomer. <sup>1</sup>H NMR (500 MHz, CDCl<sub>3</sub>)  $\delta$  7.31 (d, *J* = 9.0 Hz, 2 H), 7.17 (d, *J* = 9.0 Hz, 2 H), 5.78–5.70 (m, 1 H), 5.41–5.36 (m, 1 H), 5.17–5.10 (m, 1 H), 5.05–5.00 (m, 2 H), 4.00 (dt, *J* = 2.5, 8.5 Hz, 1 H),



3.92–3.87 (m, 1 H), 3.65 (ddt,  $J = 2.5, 5.5, 11.0$  Hz, 1 H), 2.79 (dd,  $J = 6.0, 13.5$  Hz, 1 H), 2.28–2.23 (m, 2 H), 2.10–1.98 (m, 3 H), 1.95–1.87 (m, 3 H), 1.84 (dd,  $J = 6.5, 12.5$  Hz, 1 H) 1.69–1.62 (m, 2 H), 1.29–1.26 (m, 4 H), 0.87 (t,  $J = 7.0$  Hz, 3 H);  $^{13}\text{C}$  NMR (125 MHz,  $\text{CDCl}_3$ )  $\delta$  153.7, 140.9, 135.6, 134.6, 131.2, 129.4, 128.8, 125.1, 116.9, 57.9, 57.4, 52.6, 37.7, 36.9, 32.2, 31.4, 30.8, 27.8, 22.1, 13.9 (one carbon signal is absent due to incidental equivalence); IR (film)  $1643\text{ cm}^{-1}$ . MS (ESI) 387.2207 (387.2198 calcd for  $\text{C}_{23}\text{H}_{31}\text{ClN}_2\text{O}$ ,  $\text{M} + \text{H}^+$ ). The enantiopurity was determined to be 95:5 er by chiral HPLC analysis (chiralcel ADH, 25 cm x 4.6 mm, 1.5% IPA/Hexanes, 1.5 mL/min,  $\lambda$  205 nm, RT= 20.0 and 37.5 min).

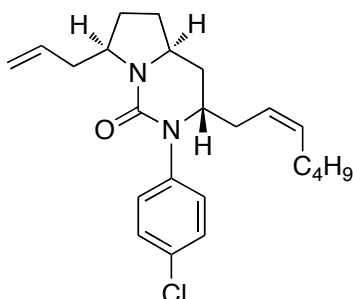

**(–)-(Z,3S,4aS,7R)-7-Allyl-2-(4-chlorophenyl)-3-(hept-2-en-1-yl)hexahydropyrrolo[1,2-c]pyrimidin-1(2H)-one (8h).** The general procedure was employed for the coupling of **7c** (61 mg, 0.2 mmol) and (*Z*)-1-bromohex-1-ene (49 mg, 0.3 mmol), using a catalyst composed of  $\text{Pd}_2\text{dba}_3$  (3.7 mg, 0.004 mmol), and (*S*)-Siphos-PE (8 mg, 0.016 mmol). 6 M HCl was used in the workup to remove 4-chloroaniline side product. This procedure afforded 47 mg (61%) of the title compound as a yellow brown oil:  $[\alpha]_{\text{D}}^{23} -14.8$  ( $c$  3.5,  $\text{CH}_2\text{Cl}_2$ ). Data are for the major isomer.  $^1\text{H}$  NMR (700 MHz,  $\text{CDCl}_3$ )  $\delta$  7.31 (d,  $J = 9.1$  Hz, 2 H), 7.19 (d,  $J = 8.4$  Hz, 2 H), 5.77–5.71 (m, 1 H), 5.45 (dt,  $J = 7.0, 11.2$  Hz, 1 H), 5.15–5.11 (m, 1 H), 5.05–5.00 (m, 2 H), 4.01 (dt,  $J = 2.8, 8.4$  Hz, 1 H), 3.91–3.88 (m, 1 H), 3.66 (ddt,  $J = 2.1, 4.9, 11.2$  Hz, 1 H), 2.78 (dd,  $J = 8.4, 13.3$  Hz, 1 H), 2.24–2.14 (m, 3 H), 2.07 (dt,  $J = 8.4, 14.0$  Hz, 1 H), 2.00–1.97 (m, 1 H) 1.95–1.83 (m, 4 H), 1.70–1.62 (m, 2 H), 1.25–1.24 (m, 4 H), 0.86 (t,  $J = 7.0$  Hz, 3 H);  $^{13}\text{C}$  NMR (175 MHz,  $\text{CDCl}_3$ )  $\delta$  153.7, 140.8, 135.6, 133.4, 131.3, 129.4, 128.9, 124.4, 117.0, 58.1, 57.4, 52.8, 37.7, 31.6, 31.3, 31.0, 30.8, 27.8, 27.2, 22.3, 13.9; IR (film)  $1642\text{ cm}^{-1}$ . MS (ESI) 387.2203 (387.2198 calcd for  $\text{C}_{23}\text{H}_{31}\text{ClN}_2\text{O}$ ,  $\text{M} + \text{H}^+$ ). The enantiopurity was determined to be 95:5 er by chiral HPLC analysis (chiralcel ADH, 25 cm x 4.6 mm, 1.5% IPA/Hexanes, 1.5 mL/min,  $\lambda$  254 nm, RT= 20.9 and 36.2 min).

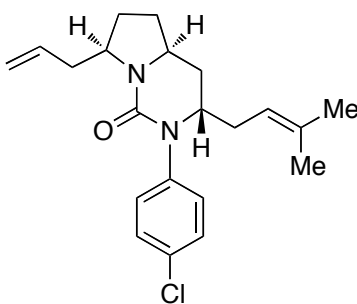

**(-)-(3S,4aS,7R)-7-Allyl-2-(4-chlorophenyl)-3-(3-methylbut-2-en-1-yl)hexahydropyrrolo[1,2-c]pyrimidin-1(2H)-one (8i).** The general procedure was employed for the coupling of **7c** (61 mg, 0.2 mmol) and 1-bromo-2-methyl-1-propene (31  $\mu$ L, 0.3 mmol), using a catalyst composed of Pd<sub>2</sub>dba<sub>3</sub> (3.7 mg, 0.004 mmol), and (S)-Siphos-PE (8 mg, 0.016 mmol). This procedure afforded 37 mg (52%) of the title compound as a yellow oil and as a 10:1 mixture of diastereomers as determined by <sup>1</sup>H NMR analysis: [ $\alpha$ ]<sub>D</sub><sup>23</sup> -37.9 (c 2.2, CH<sub>2</sub>Cl<sub>2</sub>). Data are for the major isomer. <sup>1</sup>H NMR (700 MHz, CDCl<sub>3</sub>)  $\delta$  7.30 (d, *J* = 7.7 Hz, 2 H), 7.18 (d, *J* = 9.1 Hz, 2 H), 5.74 (dddd, *J* = 6.3, 7.7, 10.5, 16.8 Hz, 1 H), 5.04 (dd, *J* = 2.1, 16.8 Hz, 1 H), 5.01 (d, *J* = 10.5 Hz, 1 H), 4.89 (dt, *J* = 1.4, 7.0 Hz, 1 H), 4.00 (dt, *J* = 2.8, 9.1 Hz, 1 H), 3.88–3.85 (m, 1 H), 3.66 (ddt, *J* = 2.8, 5.6, 11.2 Hz, 1 H), 2.79 (dd, *J* = 6.3, 12.6 Hz, 1 H), 2.21–2.16 (m, 2 H), 2.09–2.04 (m, 2 H), 2.02–1.99 (m, 1 H), 1.95–1.89 (m, 1 H), 1.84 (dd, *J* = 7.0, 12.6 Hz, 1 H) 1.68–1.62 (m, 2 H), 1.64 (s, 3 H), 1.47 (s, 3 H); <sup>13</sup>C NMR (175 MHz, CDCl<sub>3</sub>)  $\delta$  153.7, 140.9, 135.6, 134.9, 131.1, 129.3, 128.8, 119.6, 117.0, 58.3, 57.4, 52.8, 37.7, 32.2, 31.1, 30.9, 27.7, 25.7, 17.9; IR (film) 1643 cm<sup>-1</sup>. MS (ESI) 359.1895 (359.1885 calcd for C<sub>21</sub>H<sub>27</sub>ClN<sub>2</sub>O, M + H<sup>+</sup>). The enantiopurity was determined to be 94:6 er by chiral HPLC analysis (chiralcel ADH, 25 cm x 4.6 mm, 5% IPA/Hexanes, 0.75 mL/min,  $\lambda$  254 nm, RT= 13.8 and 24.0 min).

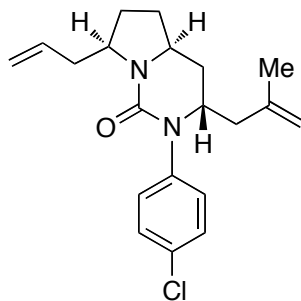

**(-)-(3S,4aS,7R)-7-Allyl-2-(4-chlorophenyl)-3-(2-methylallyl)hexahydropyrrolo[1,2-c]pyrimidin-1(2H)-one (8j).** The general procedure was employed for the coupling of **7c** (61 mg, 0.2 mmol) and 2-bromopropene (89  $\mu$ L, 1.0 mmol), using a catalyst composed of Pd<sub>2</sub>dba<sub>3</sub> (3.7 mg, 0.004 mmol), and (S)-Siphos-PE (8 mg, 0.016 mmol). This procedure afforded 39 mg

(56%) of the title compound as a yellow oil and as a 20:1 mixture of diastereomers as determined by  $^1\text{H}$  NMR analysis:  $[\alpha]_D^{23} -33.5$  (c 2.9,  $\text{CH}_2\text{Cl}_2$ ). Data are for the major isomer.  $^1\text{H}$  NMR (700 MHz,  $\text{CDCl}_3$ )  $\delta$  7.31 (d,  $J = 8.4$  Hz, 2 H), 7.19 (d,  $J = 9.1$  Hz, 2 H), 5.77–5.71 (m, 1 H), 5.06–5.01 (m, 2 H), 4.79 (s, 1 H), 4.66 (s, 1 H), 4.09–4.06 (m, 1 H), 4.00 (dt,  $J = 2.8, 8.4$  Hz, 1 H), 3.66 (ddt,  $J = 2.8, 4.9, 11.2$  Hz, 1 H), 2.79 (dd,  $J = 6.3, 12.6$  Hz, 1 H), 2.27–2.23 (m, 2 H), 2.12 (dd,  $J = 11.2, 14.0$  Hz, 1 H) 2.07 (dt,  $J = 8.4, 13.3$  Hz, 1 H), 2.03–1.99 (m, 1 H), 1.95–1.89 (m, 1 H), 1.85 (dd,  $J = 7.0, 12.6$  Hz, 1 H) 1.68–1.64 (m, 2 H), 1.55 (s, 3 H);  $^{13}\text{C}$  NMR (125 MHz,  $\text{CDCl}_3$ )  $\delta$  153.7, 141.5, 140.7, 135.6, 131.2, 129.3, 128.9, 117.0, 113.9, 57.5, 55.8, 52.6, 41.8, 37.7, 30.8, 30.5, 27.8, 22.0; IR (film)  $1641\text{ cm}^{-1}$ . MS (ESI) 345.1735 (345.1728 calcd for  $\text{C}_{20}\text{H}_{25}\text{ClN}_2\text{O}$ ,  $\text{M} + \text{H}^+$ ). The enantiopurity was determined to be 88:12 er by chiral HPLC analysis (chiralcel ADH, 25 cm x 4.6 mm, 3% IPA/Hexanes, 0.75 mL/min,  $\lambda$  254 nm, RT= 22.8 and 28.4 min).

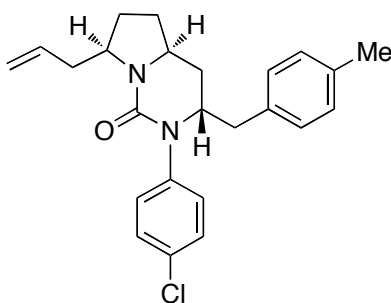

**(-)-(3S,4aS,7R)-7-Allyl-2-(4-chlorophenyl)-3-(4-methylbenzyl)hexahydropyrrolo[1,2-c]pyrimidin-1(2H)-one (8k).** The general procedure was employed for the coupling of **7c** (61 mg, 0.2 mmol) and 4-bromotoluene (37  $\mu\text{L}$ , 0.3 mmol), using a catalyst composed of  $\text{Pd}_2\text{dba}_3$  (3.7 mg, 0.004 mmol), and (*S*)-Siphos-PE (8 mg, 0.016 mmol). This procedure afforded 66 mg (83%) of the title compound as a pale yellow oil and as a 8:1 mixture of diastereomers as determined by  $^1\text{H}$  NMR analysis:  $[\alpha]_D^{23} -125.6$  (c 3.1,  $\text{CH}_2\text{Cl}_2$ ). Data are for the major isomer.  $^1\text{H}$  NMR (700 MHz,  $\text{CDCl}_3$ )  $\delta$  7.36 (d,  $J = 8.4$  Hz, 2 H), 7.26 (d,  $J = 8.4$  Hz, 2 H), 7.06 (d,  $J = 8.4$  Hz, 2 H), 6.86 (d,  $J = 7.7$  Hz, 2 H), 5.77–5.71 (m, 1 H), 5.04 (d,  $J = 16.8$  Hz, 1 H), 5.01 (d,  $J = 10.5$  Hz, 1 H), 4.10 (dt,  $J = 4.9, 11.2$  Hz, 1 H), 4.03 (dt,  $J = 2.8, 8.4$  Hz, 1 H), 3.76 (ddt,  $J = 2.8, 5.6, 11.2$  Hz, 1 H), 2.90 (dd,  $J = 2.8, 13.3$  Hz, 1 H), 2.81–2.78 (m, 1 H), 2.53 (dd,  $J = 11.2, 14.0$  Hz, 1 H), 2.30 (s, 3 H), 2.09–2.04 (m, 2 H), 2.00 (dt,  $J = 5.6, 11.9$  Hz, 1 H), 1.96–1.91 (m, 1 H), 1.85 (dd,  $J = 5.6, 12.6$  Hz, 1 H) 1.64–1.59 (m, 1 H), 1.56 (dt,  $J = 6.3, 12.6$  Hz, 1 H);  $^{13}\text{C}$  NMR (175 MHz,  $\text{CDCl}_3$ )  $\delta$  153.6, 140.8, 136.2, 135.6, 134.5, 131.3, 129.3, 129.3, 129.0, 128.9, 117.0, 59.8, 57.5, 52.6, 39.2, 37.6, 30.8, 30.1, 27.8, 21.0; IR (film)  $1642\text{ cm}^{-1}$ . MS (ESI) 395.1887 (395.1885 calcd for  $\text{C}_{24}\text{H}_{27}\text{ClN}_2\text{O}$ ,  $\text{M} + \text{H}^+$ ). The enantiopurity was determined to be 92:8 er by

chiral HPLC analysis (chiralcel ADH, 25 cm x 4.6 mm, 5% IPA/Hexanes, 0.75 mL/min,  $\lambda$  254 nm, RT= 17.3 and 19.4 min).

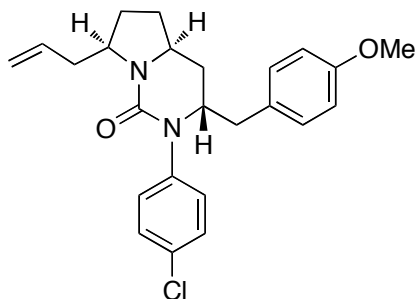

**(-)-(3S,4aS,7R)-7-Allyl-2-(4-chlorophenyl)-3-(4-methoxybenzyl)hexahydropyrrolo[1,2-c]pyrimidin-1(2H)-one (8I).** The general procedure was employed for the coupling of **7c** (61 mg, 0.2 mmol) and 4-bromoanisole (38  $\mu$ L, 0.3 mmol), using a catalyst composed of Pd<sub>2</sub>dba<sub>3</sub> (3.7 mg, 0.004 mmol), and (*S*)-Siphos-PE (8 mg, 0.016 mmol). This procedure afforded 58 mg (70%) of the title compound as a pale yellow oil and as a 8:1 mixture of diastereomers as determined by <sup>1</sup>H NMR analysis:  $[\alpha]_D^{23}$  -169.4 (c 2.2, CH<sub>2</sub>Cl<sub>2</sub>). Data are for the major isomer. <sup>1</sup>H NMR (700 MHz, CDCl<sub>3</sub>)  $\delta$  7.35 (d, *J* = 8.4 Hz, 2 H), 7.25 (d, *J* = 8.4 Hz, 2 H), 6.89 (d, *J* = 9.1 Hz, 2 H), 6.79 (d, *J* = 8.4 Hz, 2 H), 5.77–5.71 (m, 1 H), 5.04 (d, *J* = 17.5 Hz, 1 H), 5.01 (d, *J* = 10.5 Hz, 1 H), 4.08 (dt, *J* = 4.2, 11.2 Hz, 1 H), 4.03 (dt, *J* = 2.1, 8.4 Hz, 1 H), 3.77 (s, 3 H), 3.77–3.72 (m, 1 H), 2.87 (dd, *J* = 3.5, 14.0 Hz, 1 H), 2.80 (dd, *J* = 6.3, 14.0 Hz, 1 H), 2.51 (dd, *J* = 11.2, 13.3 Hz, 1 H), 2.09–2.04 (m, 2 H), 2.00 (dt, *J* = 5.6, 11.9 Hz, 1 H), 1.96–1.91 (m, 1 H), 1.85 (dd, *J* = 7.0, 12.6 Hz, 1 H) 1.65–1.54 (m, 2 H); <sup>13</sup>C NMR (175 MHz, CDCl<sub>3</sub>)  $\delta$  158.3, 153.6, 140.8, 135.6, 131.3, 130.0, 129.6, 129.3, 129.0, 117.0, 114.0, 59.9, 57.5, 55.2, 52.6, 38.7, 37.6, 30.8, 30.1, 27.8; IR (film) 1642 cm<sup>-1</sup>. MS (ESI) 411.1834 (411.1834 calcd for C<sub>24</sub>H<sub>27</sub>ClN<sub>2</sub>O<sub>2</sub>, M + H<sup>+</sup>). The enantiopurity was determined to be 92:8 er by chiral HPLC analysis (chiralcel ADH, 25 cm x 4.6 mm, 3% IPA/Hexanes, 0.75 mL/min,  $\lambda$  204 nm, RT= 49.3 and 55.7 min).

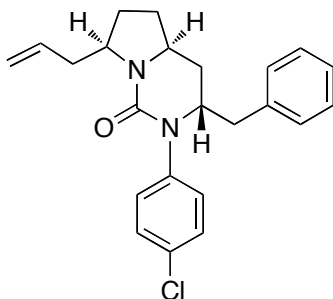

**(-)-(3S,4aS,7R)-7-Allyl-3-benzyl-2-(4-chlorophenyl)hexahydropyrrolo[1,2-c]pyrimidin-1(2H)-one (8m).** The general procedure was employed for the coupling of **7c** (61 mg, 0.2 mmol)

and bromobenzene (32  $\mu$ L, 0.3 mmol), using a catalyst composed of Pd<sub>2</sub>dba<sub>3</sub> (3.7 mg, 0.004 mmol), and (S)-Siphos-PE (8 mg, 0.016 mmol). This procedure afforded 63 mg (83%) of the title compound as a pale brown foam oil and as a 7:1 mixture of diastereomers as determined by <sup>1</sup>H NMR analysis: [ $\alpha$ ]<sub>D</sub><sup>23</sup> -61.2 (c 5.6, CH<sub>2</sub>Cl<sub>2</sub>). Data are for the major isomer. <sup>1</sup>H NMR (700 MHz, CDCl<sub>3</sub>)  $\delta$  7.36 (d, *J* = 9.1 Hz, 2 H), 7.27–7.25 (m, 4 H), 7.21–7.20 (m, 1 H), 6.98 (d, *J* = 7.0 Hz, 2 H), 5.77–5.71 (m, 1 H), 5.05–5.00 (m, 2 H), 4.14 (dt, *J* = 4.9, 11.2 Hz, 1 H), 4.03 (dt, *J* = 2.1, 8.4 Hz, 1 H), 3.77 (ddt, *J* = 2.1, 4.9, 11.2 Hz, 1 H), 2.94 (dd, *J* = 3.5, 14.0 Hz, 1 H), 2.80 (dd, *J* = 6.3, 13.3 Hz, 1 H), 2.57 (dd, *J* = 11.2, 14.0 Hz, 1 H), 2.10–2.04 (m, 2 H), 2.03–2.00 (m, 1 H), 1.97–1.91 (m, 1 H), 1.86 (dd, *J* = 6.3, 12.6 Hz, 1 H) 1.66–1.54 (m, 2 H); <sup>13</sup>C NMR (175 MHz, CDCl<sub>3</sub>)  $\delta$  153.6, 140.8, 137.6, 135.6, 131.4, 129.3, 129.1, 129.0, 128.6, 126.6, 117.0, 59.7, 57.5, 52.7, 39.6, 37.6, 30.8, 30.2, 27.8; IR (film) 1642 cm<sup>-1</sup>. MS (ESI) 381.1736 (381.1728 calcd for C<sub>23</sub>H<sub>25</sub>ClN<sub>2</sub>O, M + H<sup>+</sup>). The enantiopurity was determined to be 90:10 er by chiral HPLC analysis (chiralcel ADH, 25 cm x 4.6 mm, 5% IPA/Hexanes, 0.75 mL/min,  $\lambda$  245 nm, RT= 21.1 and 24.2 min).

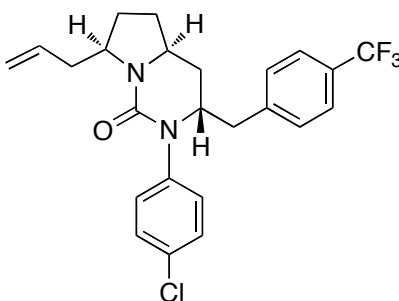

**(-)-(3S,4aS,7R)-7-Allyl-2-(4-chlorophenyl)-3-[4-(trifluoromethyl)benzyl]hexahydropyrrolo[1,2-c]pyrimidin-1(2H)-one (8n).** The general procedure was employed for the coupling of **7c** (61 mg, 0.2 mmol) and 4-bromobenzotrifluoride (42  $\mu$ L, 0.3 mmol), using a catalyst composed of Pd<sub>2</sub>dba<sub>3</sub> (3.7 mg, 0.004 mmol), and (S)-Siphos-PE (8 mg, 0.016 mmol). This procedure afforded 66 mg (74%) of the title compound as a pale yellow oil and as a 5:1 mixture of diastereomers as determined by <sup>1</sup>H NMR analysis: [ $\alpha$ ]<sub>D</sub><sup>23</sup> -46.1 (c 6.0, CH<sub>2</sub>Cl<sub>2</sub>). Data are for the major isomer. <sup>1</sup>H NMR (700 MHz, CDCl<sub>3</sub>)  $\delta$  7.51 (d, *J* = 7.7 Hz, 2 H), 7.36 (d, *J* = 9.1 Hz, 2 H), 7.24 (d, *J* = 9.1 Hz, 2 H), 7.09 (d, *J* = 7.7 Hz, 2 H), 5.77–5.71 (m, 1 H), 5.05–5.01 (m, 2 H), 4.16 (dt, *J* = 4.2, 11.2 Hz, 1 H), 4.03 (dt, *J* = 2.1, 9.1 Hz, 1 H), 3.76 (ddt, *J* = 2.1, 5.6, 11.9 Hz, 1 H), 3.00 (dd, *J* = 3.5, 14.0 Hz, 1 H), 2.79 (dd, *J* = 5.6, 13.3 Hz, 1 H), 2.66 (dd, *J* = 11.2, 13.3 Hz, 1 H), 2.09–2.00 (m, 3 H), 1.98–1.93 (m, 1 H), 1.87 (dd, *J* = 6.3, 11.9 Hz, 1 H) 1.66–1.56 (m, 2 H); <sup>13</sup>C NMR (175 MHz, CDCl<sub>3</sub>)  $\delta$  153.5, 141.7, 140.6, 135.5, 131.6, 129.4, 129.3, 129.2 (q, *J* = 37 Hz), 129.1, 125.6 (q, 3.3 Hz), 124.0 (q, *J* = 270 Hz), 117.1,

59.5, 57.6, 52.6, 39.6, 37.6, 30.8, 30.3, 27.8; IR (film) 1642  $\text{cm}^{-1}$ . MS (ESI) 449.1600 (449.1602 calcd for  $\text{C}_{24}\text{H}_{24}\text{ClF}_3\text{N}_2\text{O}$ ,  $\text{M} + \text{H}^+$ ). The enantiopurity was determined to be 85:15 er by chiral HPLC analysis (chiralcel ADH, 25 cm x 4.6 mm, 5% IPA/Hexanes, 0.75 mL/min,  $\lambda$  205 nm, RT= 19.9 and 27.5 min).

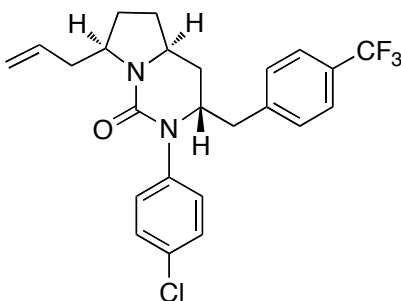

**(-)-(3S,4aS,7R)-7-Allyl-2-(4-chlorophenyl)-3-[4-(trifluoromethyl)benzyl]hexahydropyrrolo[1,2-c]pyrimidin-1(2H)-one (8n).** A modified general procedure was employed for the coupling of **7c** (61 mg, 0.2 mmol) and 4-bromobenzotrifluoride (42  $\mu\text{L}$ , 0.3 mmol) using NaOMe (16.2 mg, 0.3 mmol) as base and a catalyst composed of  $\text{Pd}_2\text{dba}_3$  (3.7 mg, 0.004 mmol), and (*S*)-Siphos-PE (8 mg, 0.016 mmol). This procedure afforded 54 mg (60%) of the title compound as a pale yellow oil and as a 10:1 mixture of diastereomers as determined by  $^1\text{H}$  NMR analysis:  $[\alpha]_D^{23} -51.1$  (c 2.3,  $\text{CH}_2\text{Cl}_2$ ). The enantiopurity was determined to be 90:10 er by chiral HPLC analysis (chiralcel ADH, 25 cm x 4.6 mm, 5% IPA/Hexanes, 0.75 mL/min,  $\lambda$  205 nm, RT= 19.4 and 26.7 min). Spectroscopic data were identical to those provided above.

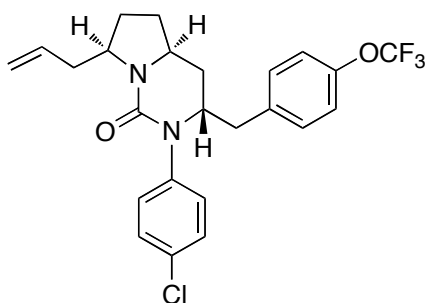

**(-)-(3S,4aS,7R)-7-Allyl-3-benzyl-2-(4-chlorophenyl)-3-[4-(trifluoromethoxy)benzyl]hexahydropyrrolo[1,2-c]pyrimidin-1(2H)-one (8o).** The general procedure was employed for the coupling of **7c** (61 mg, 0.2 mmol) and 1-bromo-4-(trifluoromethoxy)benzene (45  $\mu\text{L}$ , 0.3 mmol), using a catalyst composed of  $\text{Pd}_2\text{dba}_3$  (3.7 mg, 0.004 mmol), and (*S*)-Siphos-PE (8 mg, 0.016 mmol). This procedure afforded 63 mg (68%) of the title compound as a pale yellow oil and as a 8:1 mixture of diastereomers as determined by

$^1\text{H}$  NMR analysis:  $[\alpha]_D^{23}$   $-48.7$  (*c* 5.7,  $\text{CH}_2\text{Cl}_2$ ). Data are for the major isomer.  $^1\text{H}$  NMR (700 MHz,  $\text{CDCl}_3$ )  $\delta$  7.35 (d,  $J = 9.1$  Hz, 2 H), 7.24 (d,  $J = 9.1$  Hz, 2 H), 7.10 (d,  $J = 7.7$  Hz, 2 H), 6.99 (d,  $J = 8.4$  Hz, 2 H), 5.77–5.71 (m, 1 H), 5.05–5.01 (m, 2 H), 4.13 (dt,  $J = 4.2, 11.2$  Hz, 1 H), 4.03 (dt,  $J = 2.8, 8.4$  Hz, 1 H), 3.75 (ddt,  $J = 2.8, 4.9, 11.2$  Hz, 1 H), 2.93 (dd,  $J = 4.2, 14.0$  Hz, 1 H), 2.79 (dd,  $J = 6.3, 13.3$  Hz, 1 H), 2.60 (dd,  $J = 10.5, 14.0$  Hz, 1 H), 2.10–2.00 (m, 3 H), 1.98–1.92 (m, 1 H), 1.86 (dd,  $J = 6.3, 12.6$  Hz, 1 H) 1.67–1.57 (m, 2 H);  $^{13}\text{C}$  NMR (175 MHz,  $\text{CDCl}_3$ )  $\delta$  153.5, 147.9, 140.7, 136.7, 135.5, 131.5, 130.3, 129.3, 129.1, 121.2, 117.0, 59.6, 57.5, 52.6, 39.1, 37.6, 30.8, 30.3, 27.8 (the  $\text{CF}_3$  carbon signal could not be determined due to the appearance of carbon signals from the minor diastereomer in the  $\text{CF}_3$  region of the spectrum); IR (film)  $1642\text{ cm}^{-1}$ . MS (ESI) 465.1557 (465.1551 calcd for  $\text{C}_{24}\text{H}_{24}\text{ClF}_3\text{N}_2\text{O}_2$ ,  $\text{M} + \text{H}^+$ ). The enantiopurity was determined to be 88:12 er by chiral HPLC analysis (chiralcel ADH, 25 cm x 4.6 mm, 5% IPA/Hexanes, 0.75 mL/min,  $\lambda$  245 nm, RT= 17.1 and 19.8 min).

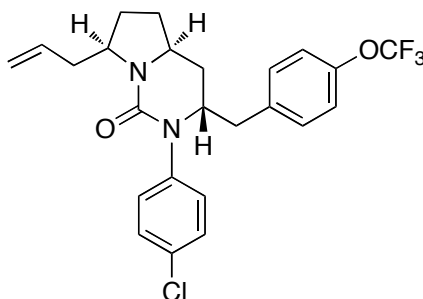

**(-)-(3S,4aS,7R)-7-Allyl-3-benzyl-2-(4-chlorophenyl)-3-[4-(trifluoromethoxy)benzyl]hexahydropyrrolo[1,2-c]pyrimidin-1(2H)-one (8o).** A modified general procedure was employed for the coupling of **7c** (61 mg, 0.2 mmol) and 1-bromo-4-(trifluoromethoxy)benzene (45  $\mu\text{L}$ , 0.3 mmol) using NaOMe (16.2 mg, 0.3 mmol) as base and a catalyst composed of  $\text{Pd}_2\text{dba}_3$  (3.7 mg, 0.004 mmol), and (*S*)-Siphos-PE (8 mg, 0.016 mmol). This procedure afforded 48 mg (52%) of the title compound as a pale yellow oil and as an 17:1 mixture of diastereomers as determined by  $^1\text{H}$  NMR analysis:  $[\alpha]_D^{23}$   $-55.6$  (*c* 1.5,  $\text{CH}_2\text{Cl}_2$ ). The enantiopurity was determined to be 93:7 er by chiral HPLC analysis (chiralcel ADH, 25 cm x 4.6 mm, 5% IPA/Hexanes, 0.75 mL/min,  $\lambda$  245 nm, RT= 16.8 and 19.8 min). Spectroscopic data were identical to those provided above.

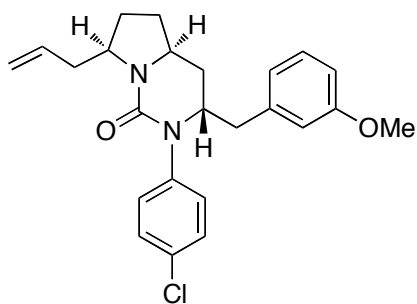

**(-)-(3S,4aS,7R)-7-Allyl-2-(4-chlorophenyl)-3-(3-methoxybenzyl)hexahydropyrrolo[1,2-c]pyrimidin-1(2H)-one (8p).** The general procedure was employed for the coupling of **7c** (61 mg, 0.2 mmol) and 3-bromoanisole (38  $\mu$ L, 0.3 mmol), using a catalyst composed of Pd<sub>2</sub>dba<sub>3</sub> (3.7 mg, 0.004 mmol), and (S)-Siphos-PE (8 mg, 0.016 mmol). This procedure afforded 61 mg (74%) of the title compound as a yellow brown solid and as a 5:1 mixture of diastereomers as determined by <sup>1</sup>H NMR analysis: [ $\alpha$ ]<sub>D</sub><sup>23</sup> -65.1 (c 2.8, CH<sub>2</sub>Cl<sub>2</sub>). Mp = 132–137 °C. Data are for the major isomer. <sup>1</sup>H NMR (700 MHz, CDCl<sub>3</sub>)  $\delta$  7.36 (d, *J* = 8.4 Hz, 2 H), 7.25 (d, *J* = 9.1 Hz, 2 H), 7.18 (t, *J* = 8.4 Hz, 1 H), 6.74 (dd, *J* = 2.1, 8.4 Hz, 1 H), 6.57 (d, *J* = 7.0 Hz, 1 H), 6.50 (s, 1 H), 5.77–5.71 (m, 1 H), 5.04 (dd, *J* = 1.4, 16.8 Hz, 1 H), 5.01 (dd, *J* = 1.4, 9.8 Hz, 1 H), 4.14 (dt, *J* = 4.2, 11.2 Hz, 1 H), 4.03 (dt, *J* = 2.1, 8.4 Hz, 1 H), 3.77 (s, 3 H), 3.78–3.73 (m, 1 H), 2.91 (dd, *J* = 3.5, 13.3 Hz, 1 H), 2.80 (dd, *J* = 5.6, 13.3 Hz, 1 H), 2.54 (dd, *J* = 11.2, 14.0 Hz, 1 H), 2.10–2.04 (m, 2 H), 2.03–1.99 (m, 1 H), 1.96–1.91 (m, 1 H), 1.85 (dd, *J* = 6.3, 12.6 Hz, 1 H), 1.65–1.56 (m, 2 H); <sup>13</sup>C NMR (175 MHz, CDCl<sub>3</sub>)  $\delta$  159.7, 153.6, 140.7, 139.2, 135.6, 131.4, 129.6, 129.3, 129.0, 121.4, 117.0, 115.3, 111.3, 59.6, 57.5, 55.2, 52.7, 39.7, 37.6, 30.8, 30.3, 27.8; IR (film) 1642 cm<sup>-1</sup>. MS (ESI) 411.1841 (411.1834 calcd for C<sub>24</sub>H<sub>27</sub>ClN<sub>2</sub>O<sub>2</sub>, M + H<sup>+</sup>). The enantiopurity was determined to be 87:13 er by chiral HPLC analysis (chiralcel ADH, 25 cm x 4.6 mm, 5% IPA/Hexanes, 0.75 mL/min,  $\lambda$  248 nm, RT= 27.2 and 30.6 min).

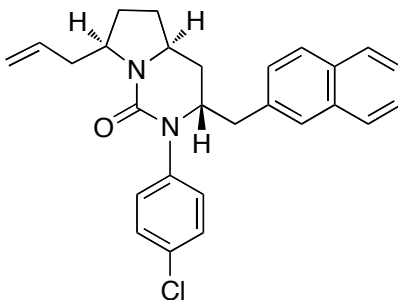

**(-)-(3S,4aS,7R)-7-Allyl-2-(4-chlorophenyl)-3-(naphthalen-2-ylmethyl)hexahydropyrrolo[1,2-c]pyrimidin-1(2H)-one (8q).** The general procedure was employed for the coupling of **7c** (61 mg, 0.2 mmol) and 2-bromonaphthalene (62 mg, 0.3 mmol), using a catalyst composed of Pd<sub>2</sub>dba<sub>3</sub> (3.7 mg, 0.004 mmol), and (S)-Siphos-PE (8 mg, 0.016 mmol). This procedure afforded



66 mg (77%) of the title compound as a white solid and as a 7:1 mixture of diastereomers as determined by  $^1\text{H}$  NMR analysis:  $[\alpha]^{23}_{\text{D}} -77.9$  (c 4.6,  $\text{CH}_2\text{Cl}_2$ ). Data are for the major isomer. Mp = 63–65 °C.  $^1\text{H}$  NMR (700 MHz,  $\text{CDCl}_3$ )  $\delta$  7.80 (d,  $J = 7.7$  Hz, 1 H), 7.75 (t,  $J = 7.7$  Hz, 2 H), 7.47–7.44 (m, 3 H), 7.38 (d,  $J = 9.1$  Hz, 2 H), 7.31 (d,  $J = 8.4$  Hz, 2 H), 7.07 (dd,  $J = 0.7, 8.4$  Hz, 1 H), 5.78–5.72 (m, 1 H), 5.04 (d,  $J = 16.8$  Hz, 1 H), 5.02 (d,  $J = 9.8$  Hz, 1 H), 4.25 (dt,  $J = 4.2, 11.2$  Hz, 1 H), 4.06 (dt,  $J = 2.1, 9.8$  Hz, 1 H), 3.84 (ddt,  $J = 2.1, 4.9, 11.2$  Hz, 1 H), 3.11 (dd,  $J = 3.5, 14.0$  Hz, 1 H), 2.81 (dd,  $J = 5.6, 13.3$  Hz, 1 H), 2.74 (dd,  $J = 11.9, 14.0$  Hz, 1 H), 2.11–2.05 (m, 2 H), 2.04–1.94 (m, 2 H), 1.86 (dd,  $J = 7.0, 12.6$  Hz, 1 H), 1.65–1.56 (m, 2 H);  $^{13}\text{C}$  NMR (175 MHz,  $\text{CDCl}_3$ )  $\delta$  153.6, 140.8, 135.6, 135.1, 133.4, 132.2, 131.4, 130.4, 129.4, 129.1, 128.4, 127.7, 127.3, 127.1, 126.3, 125.7, 117.0, 59.6, 57.5, 52.7, 37.6, 30.8, 31.0, 30.2, 27.8; IR (film) 1646  $\text{cm}^{-1}$ . MS (ESI) 431.1886 (431.1885 calcd for  $\text{C}_{27}\text{H}_{27}\text{ClN}_2\text{O}$ ,  $\text{M} + \text{H}^+$ ). The enantiopurity was determined to be 88:12 er by chiral HPLC analysis (chiralcel ADH, 25 cm x 4.6 mm, 5% IPA/Hexanes, 0.75 mL/min,  $\lambda$  215 nm, RT= 24.4 and 28.2 min).

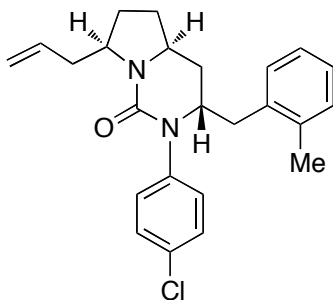

**(-)-(3S,4aS,7R)-7-Allyl-2-(4-chlorophenyl)-3-(2-methylbenzyl)hexahydropyrrolo[1,2-c]pyrimidin-1(2H)-one (8r).** The general procedure was employed for the coupling of **7c** (61 mg, 0.2 mmol) and 2-bromotoluene (36  $\mu\text{L}$ , 0.3 mmol), using a catalyst composed of  $\text{Pd}_2\text{dba}_3$  (3.7 mg, 0.004 mmol), and (*S*)-Siphos-PE (8 mg, 0.016 mmol). This procedure afforded 65 mg (82%) of the title compound as a pale brown oil and as a 5:1 mixture of diastereomers as determined by  $^1\text{H}$  NMR analysis:  $[\alpha]^{23}_{\text{D}} -30.1$  (c 5.7,  $\text{CH}_2\text{Cl}_2$ ). Data are for the major isomer.  $^1\text{H}$  NMR (700 MHz,  $\text{CDCl}_3$ )  $\delta$  7.36 (d,  $J = 9.1$  Hz, 2 H), 7.26 (d,  $J = 8.4$  Hz, 2 H), 7.11–7.08 (m, 3 H), 6.93–6.92 (m, 1 H), 5.78–5.71 (m, 1 H), 5.04 (dd,  $J = 1.4, 17.5$  Hz, 1 H), 5.01 (dd,  $J = 1.4, 10.5$  Hz, 1 H), 4.09 (dt,  $J = 4.2, 12.6$  Hz, 1 H), 4.04 (dt,  $J = 2.8, 9.1$  Hz, 1 H), 3.86 (ddt,  $J = 2.8, 5.6, 11.2$  Hz, 1 H), 2.93 (dd,  $J = 3.5, 14.0$  Hz, 1 H), 2.80 (dd,  $J = 5.6, 12.6$  Hz, 1 H), 2.62 (dd,  $J = 11.2, 14.0$  Hz, 1 H), 2.11–2.02 (m, 3 H), 2.01 (s, 3 H), 1.99–1.94 (m, 1 H), 1.87 (dd,  $J = 6.3, 12.6$  Hz, 1 H), 1.65 (ddd,  $J = 6.3, 11.2, 17.5$  Hz, 1 H), 1.58 (dt,  $J = 5.6, 12.6$  Hz, 1 H);  $^{13}\text{C}$  NMR (175 MHz,  $\text{CDCl}_3$ )  $\delta$  153.6, 140.7, 136.3, 135.7, 135.6, 131.5, 130.6, 130.3, 129.6, 129.0, 126.8, 126.0, 117.0, 58.4, 57.5, 52.9, 37.7, 36.8, 30.8, 30.1, 27.8, 19.2; IR (film) 1642  $\text{cm}^{-1}$ . MS (ESI)

395.1885 (395.1885 calcd for  $C_{24}H_{27}ClN_2O$ ,  $M + H^+$ ). The enantiopurity was determined to be 71:29 er by chiral HPLC analysis (chiralcel ADH, 25 cm x 4.6 mm, 5% IPA/Hexanes, 0.75 mL/min,  $\lambda$  215 nm, RT= 20.1 and 24.3 min).

### Deprotection of Bicyclic Urea Product 8c

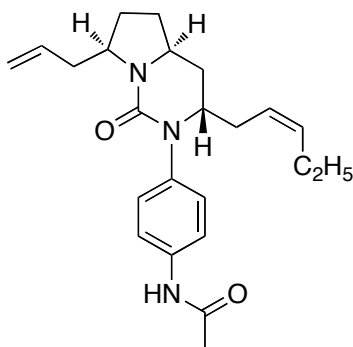

**(-)-(Z,3S,4aS,7R)-N-{4-[7-Allyl-1-oxo-3-(pent-2-en-1-yl)hexahydropyrrolo[1,2-c]pyrimidin-2(1H)-yl]phenyl}acetamide (S3).** A flame-dried screwtop-flask was cooled under vacuum and charged with  $Pd_2(dba)_3$  (5.2 mg, 0.006 mmol), 2-di-*tert*-butylphosphino-3,4,5,6-tetramethyl-2',4',6'-triisopropyl-1,1'-biphenyl (13.7 mg, 0.03 mmol),  $K_3PO_4$  (182 mg, 0.86 mmol) and acetamide (50.8 mg, 0.86 mmol). The flask was evacuated and backfilled with  $N_2$ , and then a solution of **8c** (206 mg, 0.57 mmol) in *tert*-butanol (3 mL) was added via syringe. The flask was sealed, heated to 110 °C and stirred overnight (14 h). The mixture was cooled to room temperature and the mixture was filtered through a plug of celite, eluted with EtOAc (10 mL), and concentrated *in vacuo*. The crude material was purified by flash chromatography on silica gel to afford 191 mg (88%) of the title compound as a foamy brown solid: mp = 38–42 °C.  $[\alpha]_D^{23}$  -25.2 (*c* 5.3,  $CH_2Cl_2$ ).  $^1H$  NMR (700 MHz,  $CDCl_3$ )  $\delta$  8.93 (s, 1 H), 7.21 (d,  $J$  = 8.4 Hz, 2 H), 6.98 (d,  $J$  = 8.4 Hz, 2 H), 5.77–5.72 (m, 1 H), 5.49–5.40 (m, 1 H), 5.07–5.03 (m, 3 H), 4.03 (dt,  $J$  = 2.8, 9.1 Hz, 1 H), 3.77 (dt,  $J$  = 4.2, 10.5 Hz, 1 H), 3.67 (ddt,  $J$  = 2.8, 4.9, 8.4 Hz, 1 H), 2.80 (dd,  $J$  = 4.9, 12.6 Hz, 1 H), 2.25–2.08 (m, 4 H), 2.05 (s, 3 H) 2.02–1.98 (m, 1 H), 1.95–1.85 (m, 4 H), 1.70–1.64 (m, 2 H), 0.88 (t,  $J$  = 7.7 Hz, 3 H);  $^{13}C$  NMR (175 MHz,  $CDCl_3$ )  $\delta$  168.8, 154.5, 137.3, 136.6, 135.5, 134.8, 128.3, 124.0, 121.3, 117.1, 58.5, 57.3, 52.8, 37.8, 31.2, 31.0, 30.8, 27.7, 24.0, 20.8, 14.1; IR (film) 3263, 1687, 1624  $cm^{-1}$ . MS (ESI) 382.2493 (382.2489 calcd for  $C_{23}H_{31}N_3O_2$ ,  $M + H^+$ ).

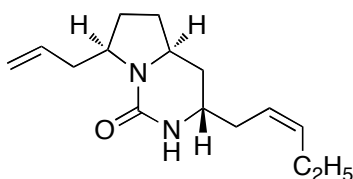

**(-)-(Z,3S,4aS,7R)-7-Allyl-3-(pent-2-en-1-yl)hexahydropyrrolo[1,2-c]pyrimidin-1(2H)-one (9).**

A Schlenk tube was charged with a stirbar, **S3** (39 mg, 0.1 mmol) and CH<sub>3</sub>CN (1 mL). A solution of ceric ammonium nitrate (164 mg, 0.3 mmol) in H<sub>2</sub>O (1 mL) was added to the reaction flask and the mixture was stirred at rt for 5 min. The mixture was then heated at 50 °C for 15 min before being cooled to rt, at which time EtOAc (5 mL) was added. The mixture was transferred to a separatory funnel and the layers were separated. The organic layer was washed with saturated aqueous Na<sub>2</sub>SO<sub>3</sub> (5 mL), saturated aqueous NaHCO<sub>3</sub> (5 mL), and brine (5 mL). The organic layer was dried over anhydrous sodium sulfate, filtered, and concentrated *in vacuo*. The crude material was purified by flash chromatography (2% MeOH in CH<sub>2</sub>Cl<sub>2</sub>) on silica gel to afford 19 mg (77%) of the title compound as a yellow brown solid:  $[\alpha]_D^{23} -63.2$  (c 0.5, CH<sub>2</sub>Cl<sub>2</sub>). <sup>1</sup>H NMR (500 MHz, CDCl<sub>3</sub>) δ 5.80–5.72 (m, 1 H), 5.57–5.51 (m, 1 H), 5.30–5.25 (m, 1 H), 5.06–5.02 (m, 2 H), 4.73 (s, 1 H), 4.00 (dt, *J* = 3.0, 8.5 Hz, 1 H), 3.49 (ddt, *J* = 3.0, 5.5, 11.5 Hz, 1 H), 3.46–3.41 (m, 1 H), 2.72 (d, *J* = 14.5 Hz, 1 H), 2.26–2.20 (m, 1 H), 2.13–1.93 (m, 6 H), 1.88–1.77 (m, 2 H), 1.61–1.52 (m, 2 H), 0.96 (t, *J* = 7.5 Hz, 3 H); <sup>13</sup>C NMR (175 MHz, CDCl<sub>3</sub>) δ 155.1, 135.6, 135.2, 124.0, 117.0, 56.2, 52.9, 50.0, 38.1, 35.7, 32.3, 30.7, 27.4, 20.8, 14.1; IR (film) 3207, 1652 cm<sup>-1</sup>. MS (ESI) 249.1963 (249.1961 calcd for C<sub>15</sub>H<sub>24</sub>N<sub>2</sub>O, M + H<sup>+</sup>).

**Conversion of Bicyclic Urea Product 8c to Tricyclic Guanidine 12**

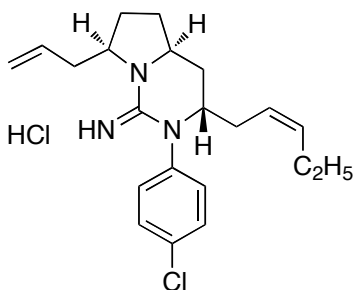

**(-)-(Z,3S,4aS,7R)-7-Allyl-2-(4-chlorophenyl)-3-(pent-2-en-1-yl)hexahydropyrrolo[1,2-c]pyrimidin-1(2H)-imine hydrochloride (10).**

A flame-dried flask was cooled under a stream of N<sub>2</sub> and charged with **8c** (177 mg, 0.49 mmol) and toluene (5 mL). Freshly distilled POCl<sub>3</sub> (2.5 mL, 27 mmol) was added and the mixture was stirred at rt until the starting material had been consumed as judged by ESI<sup>+</sup> MS analysis (ca. 3 hr). The reaction mixture was cooled to rt and concentrated *in vacuo*. The crude product was dissolved in acetonitrile (5 mL) and a solution of

ammonia (20 mL, 2 M in ethanol) was added. The mixture was stirred at rt until the starting material had been consumed as judged by ESI<sup>+</sup> MS analysis (ca. 1 hr). The reaction mixture was concentrated and dissolved in methylene chloride (5 mL). Water (5 mL) was added and the mixture was transferred to a separatory funnel. The layers were separated and the organic layer was washed with saturated aqueous NaCl (3 x 10 mL). The combined aqueous layers were extracted with methylene chloride (3 x 10 mL). The combined organics layers were dried over anhydrous sodium sulfate, filtered, and concentrated *in vacuo*. The crude material was purified by flash chromatography on silica gel to afford 146 mg (75%) of the title compound as a pale white-yellow foam:  $[\alpha]_D^{23} -45.5$  (c 1.1, CH<sub>2</sub>Cl<sub>2</sub>). <sup>1</sup>H NMR (700 MHz, CDCl<sub>3</sub>) δ 7.48 (d, *J* = 7.7 Hz, 1 H), 7.40 (d, *J* = 7.7 Hz, 1 H), 7.29 (d, *J* = 7.0 Hz, 1 H), 7.14 (d, *J* = 8.4 Hz, 1 H), 5.96–5.90 (m, 1 H), 5.45 (dt, *J* = 7.0, 10.5 Hz, 1 H), 5.00–4.93 (m, 4 H), 3.75–3.72 (m, 1 H), 3.62–3.58 (m, 1 H), 2.67 (d, *J* = 13.3 Hz, 1 H), 2.25 (dd, *J* = 2.1, 14.0 Hz, 1 H), 2.18–2.16 (m, 1 H) 2.12–2.06 (m, 3 H), 2.03–1.93 (m, 2 H), 1.81–1.68 (m, 4 H), 0.82 (t, *J* = 7.7 Hz, 3 H); <sup>13</sup>C NMR (175 MHz, CDCl<sub>3</sub>) δ 151.3, 136.6, 136.1, 135.8, 134.5, 131.5, 131.4, 130.8, 128.9, 121.7, 118.3, 59.5, 59.1, 53.1, 36.2, 30.8, 30.4, 29.6, 28.1, 20.8, 13.9; IR (film) 3457, 3275, 1636 cm<sup>-1</sup>. MS (ESI) 358.2048 (358.2045 calcd for C<sub>21</sub>H<sub>29</sub>ClN<sub>3</sub>, M<sup>+</sup>).

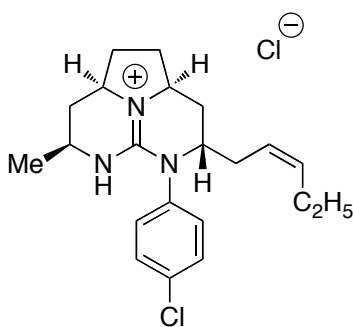

**(-)-(Z,2aS,4S,7S,8aR)-5-(4-Chlorophenyl)-7-methyl-4-(pent-2-en-1-yl)-1,2,2a,3,4,5,6,7,8,8a-decahydro-2a<sup>1</sup>,5,6-triazaacenaphthylene-2a<sup>1</sup>-ium chloride (12).** A test tube was charged with **10** (39.4 mg, 0.1 mmol), PdCl<sub>2</sub> (3.5 mg, 0.02 mmol), and CuCl (14.8 mg, 0.15 mmol). The tube was capped with a rubber septum, was briefly flushed with oxygen and then an oxygen-filled balloon attached to a needle (via an adaptor) was connected to the tube through the septum. A solution of THF and H<sub>2</sub>O (7:1, 1.0 mL) was added to the test tube and the mixture was stirred at rt until the starting material had been consumed as judged by ESI<sup>+</sup> MS analysis (ca. 4 hr). Methanol (1 mL) and NaCNBH<sub>3</sub> (62.8 mg, 1.0 mmol) was added and the mixture was heated to 50 °C until the starting material had been consumed as judged by ESI<sup>+</sup> MS analysis (ca. 3 hr). The reaction mixture was cooled to rt and concentrated *in vacuo*. The crude product was dissolved in methylene chloride (20 mL), the mixture was transferred to a separatory funnel and

2 M HCl (10 mL) was added. The layers were separated and the organic layer was washed with NH<sub>4</sub>OH (10 mL) to potentially remove any excess copper. The layers were separated and the organic layer was washed with 2 M HCl (10 mL). The organics layer was dried over anhydrous sodium sulfate, filtered, and concentrated *in vacuo*. The crude material was purified by flash chromatography on silica gel to afford 31 mg (79%) of the title compound as a pale white-tan oil and as a 5:1 mixture of diastereomers as determined by <sup>1</sup>H NMR analysis: [ $\alpha$ ]<sub>D</sub><sup>23</sup> -38.1 (c 0.6, CH<sub>2</sub>Cl<sub>2</sub>). Data are for the major isomer. <sup>1</sup>H NMR (500 MHz, CDCl<sub>3</sub>)  $\delta$  7.56 (d, *J* = 7.5 Hz, 2 H), 7.34 (d, *J* = 8.5 Hz, 2 H), 5.57–5.52 (m, 1 H), 5.10–5.05 (m, 1 H), 4.64 (s, 1 H), 3.99–3.90 (m, 2 H), 3.77–3.73 (m, 1 H), 3.69–3.65 (m, 1 H), 2.46–2.32 (m, 5 H), 2.28 (dt, *J* = 3.5, 13.0 Hz, 1 H), 1.99–1.93 (m, 3 H), 1.88–1.80 (m, 2 H), 1.51–1.44 (m, 1 H), 1.22 (d, *J* = 6.5 Hz, 3 H), 0.93 (t, *J* = 7.5 Hz, 3 H); <sup>13</sup>C NMR (175 MHz, CDCl<sub>3</sub>)  $\delta$  148.6, 136.6, 136.5, 135.2, 132.0–129.0 (br, 2 C), 121.9, 59.8, 57.7, 52.1, 47.4, 34.8, 30.0, 29.9, 29.6, 29.4, 20.9, 20.6, 14.0; IR (film) 3276, 1607 cm<sup>-1</sup>. MS (ESI) 358.2047 (358.2045 calcd for C<sub>21</sub>H<sub>29</sub>ClN<sub>3</sub>, M<sup>+</sup>).

#### Conversion of Bicyclic Urea Product 8c to 9-*epi*-Batzelladine K 16

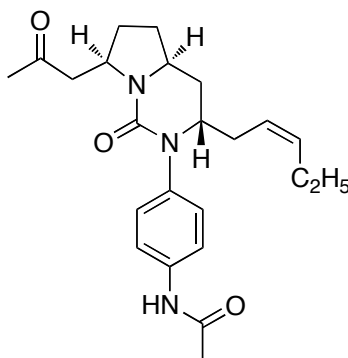

**(-)-(Z,3S,4aS,7R)-N-{4-[1-Oxo-7-(2-oxopropyl)-3-(pent-2-en-1-yl)hexahydropyrrolo[1,2-c]pyrimidin-2(1H)-yl]phenyl}acetamide (13)**. A test tube was charged with **S3** (300 mg, 0.79 mmol), PdCl<sub>2</sub> (28 mg, 0.16 mmol), and CuCl (117 mg, 1.18 mmol). The tube was capped with a rubber septum, was briefly flushed with oxygen and then an oxygen-filled balloon attached to a needle (via an adaptor) was connected to the tube through the septum. A solution of DMF and H<sub>2</sub>O (7:1, 8.0 mL) was added to the test tube and the mixture was stirred at rt until the starting material had been consumed as judged by ESI<sup>+</sup> MS analysis (ca. 4 hr). EtOAc (20 mL) and brine (20 mL) was added and the mixture was transferred to a separatory funnel. The layers were separated and the organic layer was washed with NH<sub>4</sub>OH (5 mL) to potentially remove any excess copper. The combined aqueous layers were then extracted with EtOAc (20 mL). The organics layer was dried over anhydrous sodium sulfate, filtered, and concentrated *in vacuo*.

The crude material was purified by flash chromatography on silica gel to afford 230 mg (74%) of the title compound as a pale yellow-pink solid: mp = 68–72 °C.  $[\alpha]_D^{23}$  –38.8 (c 0.8, CH<sub>2</sub>Cl<sub>2</sub>). <sup>1</sup>H NMR (700 MHz, CDCl<sub>3</sub>) δ 8.66 (s, 1 H), 7.25 (d, *J* = 8.4 Hz, 2 H), 7.01 (d, *J* = 9.1 Hz, 2 H), 5.44–5.41 (m, 1 H), 5.06–5.03 (m, 1 H), 4.37–4.34 (m, 1 H), 3.80–3.77 (m, 1 H), 3.66 (ddd, *J* = 2.8, 4.9, 11.2 Hz, 1 H), 3.44 (dd, *J* = 2.8, 9.8 Hz, 1 H), 2.31 (dd, *J* = 9.8, 16.8 Hz, 1 H), 2.26–2.13 (m, 3 H), 2.10 (s, 3 H), 2.06 (s, 3 H), 2.09–2.03 (m, 2 H), 1.91–1.86 (m, 2 H), 1.77 (dd, *J* = 7.0, 13.3 Hz, 1 H), 1.65–1.58 (m, 2 H), 0.88 (t, *J* = 7.0 Hz, 3 H); <sup>13</sup>C NMR (175 MHz, CDCl<sub>3</sub>) δ 207.5, 168.7, 154.2, 137.2, 136.7, 134.9, 128.3, 123.8, 121.1, 58.5, 53.7, 52.8, 47.6, 31.1, 30.8, 30.2, 29.4, 24.0, 20.8, 14.0 (one carbon signal is absent due to incidental equivalence); IR (film) 3261, 1711, 1687, 1621 cm<sup>-1</sup>. MS (ESI) 398.2439 (398.2438 calcd for C<sub>23</sub>H<sub>31</sub>N<sub>3</sub>O<sub>3</sub>, M + H<sup>+</sup>).

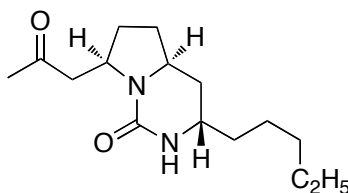

**(–)-(3S,4aS,7R)-7-(2-Oxopropyl)-3-pentylhexahydropyrrolo[1,2-c]pyrimidin-1(2H)-one (14).**

A flame-dried flask was cooled under vacuum and charged with **13** (100 mg, 0.25 mmol) and Pd/C (10 mg). The flask was capped with a rubber septum, was briefly flushed with hydrogen and then a hydrogen-filled balloon attached to a needle (via an adaptor) was connected to the flask through the septum. Methanol (2.5 mL) was added to the flask and the mixture was stirred at rt until the starting material had been consumed as judged by ESI<sup>+</sup> MS analysis (ca. 45 min). The crude product was then filtered through a plug of celite to remove the Pd/C and washed with methanol (5 mL). The crude material was concentrated *in vacuo* and carried on to the next step without further purification. The crude product was dissolved in CH<sub>3</sub>CN (10 mL) and transferred to a round-bottom flask charged with a stirbar. A solution of ceric ammonium nitrate (123 mg, 0.75 mmol) in H<sub>2</sub>O (30 mL) was added to the reaction flask and the mixture was stirred at rt for 5 min. The mixture was then heated at 50 °C for 4 hr before being cooled to rt, at which time EtOAc (25 mL) was added. The mixture was transferred to a separatory funnel and the layers were separated. The organic layer was washed with saturated aqueous Na<sub>2</sub>SO<sub>3</sub> (15 mL), saturated aqueous NaHCO<sub>3</sub> (15 mL), and brine (15 mL). The organic layer was dried over anhydrous sodium sulfate, filtered, and concentrated *in vacuo*. The crude material was purified by flash chromatography on silica gel to afford 34 mg (51%) of the title compound as a white solid: mp = 84–88 °C.  $[\alpha]_D^{23}$  –11.7 (c 2.5, CH<sub>2</sub>Cl<sub>2</sub>). <sup>1</sup>H NMR (700 MHz, CDCl<sub>3</sub>) δ 4.79 (s, 1 H), 4.30–4.28 (m, 1 H), 3.48–3.45 (m, 1 H), 3.43–3.39 (m, 2 H), 2.29 (dd, *J* = 9.8, 16.8 Hz, 1 H),

2.10 (s, 3 H), 2.03–1.98 (m, 2 H), 1.95–1.94 (m, 1 H), 1.72 (dd,  $J = 7.7, 12.6$  Hz, 1 H), 1.54–1.46 (m, 3 H), 1.38–1.25 (m, 7 H), 0.88 (t,  $J = 7.0$  Hz, 3 H);  $^{13}\text{C}$  NMR (175 MHz,  $\text{CDCl}_3$ )  $\delta$  207.7, 155.0, 52.8, 52.8, 50.0, 47.6, 37.8, 32.9, 31.6, 30.6, 30.3, 29.0, 25.5, 22.6, 14.0; IR (film) 3207, 1709, 1649  $\text{cm}^{-1}$ . MS (ESI) 267.2065 (267.2067 calcd for  $\text{C}_{15}\text{H}_{26}\text{N}_2\text{O}_2$ ,  $\text{M} + \text{H}^+$ ).

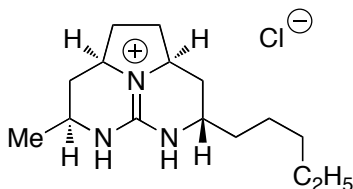

**(-)-9-epi-Batzelladine K (16).** A flame-dried flask was cooled under vacuum and charged with **14** (25 mg, 0.09 mmol) and dichloromethane (0.9 mL). 2,6-di-*tert*-butylpyridine (203  $\mu\text{L}$ , 0.94 mmol) and MeOTf (103  $\mu\text{L}$ , 0.94 mmol) were added and the mixture was stirred at rt until the starting material had been consumed as judged by ESI<sup>+</sup> MS analysis (ca. 1 hr). The solvent was then removed in a hood by blowing a constant stream of  $\text{N}_2$  over the stirring mixture. The solution was then poured in diethyl ether (20 ml) and washed with 1 M NaOH (10 mL) and brine (10 mL). The organic layer was dried over anhydrous sodium sulfate, filtered, and concentrated *in vacuo*. The crude material was used without further purification. The crude *O*-methylisourea was dissolved in methanol (2 mL) and transferred to a thick walled glass vial at which time ammonium chloride (10.1mg, 0.19 mmol) was added to this solution. Anhydrous ammonia was bubbled through this solution for ~15 min before the reaction vessel was sealed and heated to 60 °C overnight (14 hr). The reaction was cooled to rt and concentrated *in vacuo*. The crude guanidine product **15** was used without further purification. Crude product **15** was dissolved in methanol (3 mL),  $\text{NaCNBH}_3$  (59 mg, 0.94 mmol) was added and the mixture was heated to 50 °C until the starting material had been consumed as judged by ESI<sup>+</sup> MS analysis (ca. 12 hr). The reaction mixture was cooled to rt and concentrated *in vacuo*. The crude product was dissolved in methylene chloride (20 mL), the mixture was transferred to a separatory funnel and washed with 2 M HCl (2 x 10 mL) and brine (1 x 10 mL). The organic layer was dried over anhydrous sodium sulfate, filtered, and concentrated *in vacuo*. The crude material was determined to be a 3:1 mixture of diastereomers by  $^1\text{H}$  NMR analysis. The crude material was purified by flash chromatography on silica gel to afford 13 mg (48%) of the title compound as a pale yellow oil. The following data is for the pure isolated major diastereomer.  $[\alpha]_{\text{D}}^{23} -43.8$  ( $c$  0.5,  $\text{CH}_2\text{Cl}_2$ ).  $^1\text{H}$  NMR (700 MHz,  $\text{CDCl}_3$ )  $\delta$  3.80–3.73 (m, 2 H), 3.58–3.53 (m, 1 H), 3.52–3.49 (m, 1 H), 2.26–2.21 (m, 3 H), 2.19 (dd,  $J = 4.2, 13.3$  Hz, 1 H), 1.73–1.64 (m, 2 H), 1.60–1.56 (m, 2 H), 1.52–1.47 (m, 1 H), 1.44–1.27 (m, 7 H), 1.27 (d,  $J = 6.3$  Hz, 3 H), 0.93 (t,  $J = 7.0$  Hz, 3 H);

$^{13}\text{C}$  NMR (175 MHz,  $\text{CDCl}_3$ )  $\delta$  149.4, 56.3, 51.6, 48.4, 45.8, 36.2, 35.5, 31.5, 31.2, 30.5, 30.2, 25.5, 22.4, 20.5, 14.0;  $^1\text{H}$  NMR (700 MHz,  $\text{CD}_3\text{OD}$ )  $\delta$  7.56 (d,  $J = 7.5$  Hz, 2 H), 7.34 (d,  $J = 8.5$  Hz, 2 H), 5.57–5.52 (m, 1 H), 5.10–5.05 (m, 1 H), 4.64 (s, 1 H), 3.99–3.90 (m, 2 H), 3.77–3.73 (m, 1 H), 3.69–3.65 (m, 1 H), 2.46–2.32 (m, 5 H), 2.28 (dt,  $J = 3.5, 13.0$  Hz, 1 H), 1.99–1.93 (m, 3 H), 1.88–1.80 (m, 2 H), 1.51–1.44 (m, 1 H), 1.22 (d,  $J = 6.5$  Hz, 3 H), 0.93 (t,  $J = 7.5$  Hz, 3 H);  $^{13}\text{C}$  NMR (175 MHz,  $\text{CD}_3\text{OD}$ )  $\delta$  150.4, 57.5, 53.5, 50.2, 47.3, 36.8, 36.1, 32.7, 31.9, 31.3, 30.7, 26.8, 23.6, 20.8, 14.3; IR (film) 3284, 3202, 1637  $\text{cm}^{-1}$ . MS (ESI) 250.2278 (250.2278 calcd for  $\text{C}_{15}\text{H}_{28}\text{N}_3$ ,  $\text{M}^+$ ).

### Assignment of Stereochemistry

The relative stereochemistry of compound **8k** was assigned on the basis of observed  $^1\text{H}$  NMR nOe experiments. Significant nOe relationships are shown below. The stereochemistry of all other bicyclic urea products was assigned based on analogy to **8k**.

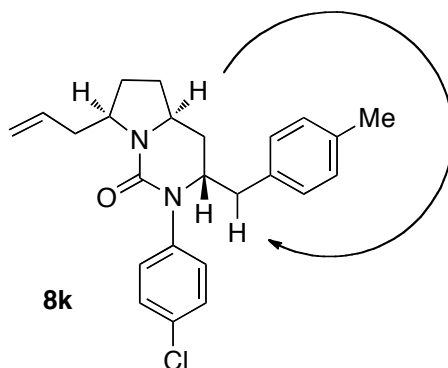

The relative stereochemistry of compounds **12** and **16** were assigned on the basis of observed  $^1\text{H}$  NMR nOe experiments. Significant nOe relationships are shown below.

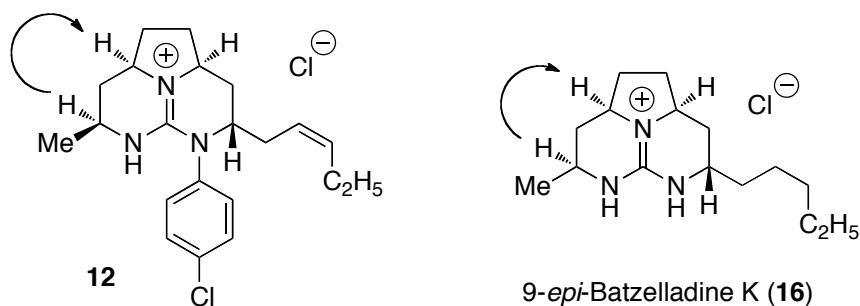

The absolute stereochemistry of the urea products was assigned via the synthesis of compound **ent-8c** from pent-4-enal via the route illustrated below in Scheme S1. The optical rotation of product **ent-8c** prepared via this route was opposite that of the product **8c** generated in the Pd-catalyzed carboamination reaction between **7c** and Z-bromobutene. In addition, analysis of



product **ent-8c** by chiral HPLC indicated that **ent-8c** was the enantiomer of product **8c** formed in the catalytic reaction.

### Scheme S1

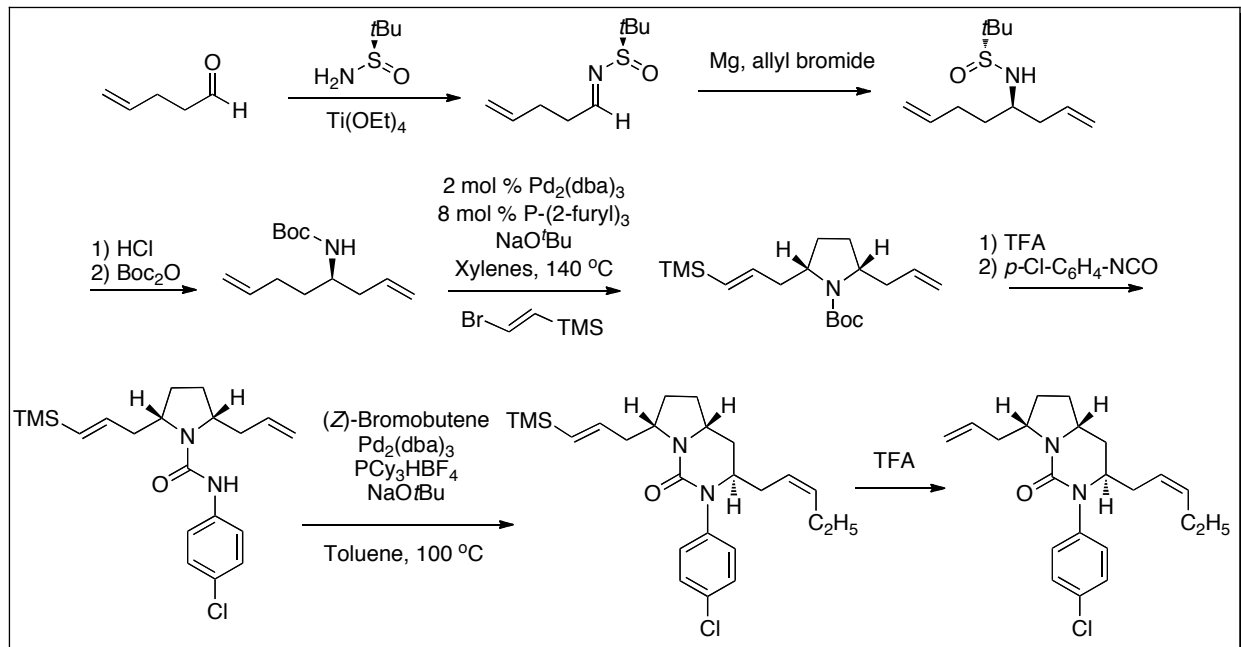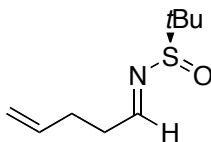

**(-)-(R<sub>S</sub>)-2-Methyl-N-(pent-4-en-1-ylidene)propane-2-sulfonamide (S4).** This compound was prepared according to the procedure reported by Ellman.<sup>[4]</sup> A flame-dried flask was cooled under a stream of N<sub>2</sub> and charged with pent-4-enal (1.38 mL, 14 mmol) and THF (40 mL). Titanium ethoxide (4.2 mL, 20 mmol) was added and the reaction mixture was stirred at rt for 5 min. (*R*)-*tert*-butanesulfonamide (1.21 g, 10 mmol) was added in one portion and the mixture was stirred overnight (ca. 14 h) at rt. The reaction mixture was poured into brine (40 mL) and stirred for 10 min. Ethyl acetate (20 mL) was added, the mixture was filtered through celite and the celite was washed with ethyl acetate (50 mL). The mixture was transferred to a separatory funnel, brine (20 mL) was added, and the layers were separated. The aqueous phase was extracted with ethyl acetate (2 x 30 mL). The combined organic layers were dried over anhydrous sodium sulfate, filtered, and concentrated *in vacuo*. The crude material was purified by flash chromatography on silica gel to afford 1.38 g (74%) of the title compound as a colorless oil. Spectroscopic properties are identical to those previously reported.<sup>[5]</sup> <sup>1</sup>H NMR (500 MHz, CDCl<sub>3</sub>)

$\delta$  8.08 (t,  $J$  = 4.5 Hz, 1 H), 5.84 (ddt,  $J$  = 4.5, 10.0, 17.0 Hz, 1 H), 5.08 (dd,  $J$  = 1.5, 17.0 Hz, 1 H), 5.02 (dd,  $J$  = 1.5, 10.0 Hz, 1 H), 2.63 (td,  $J$  = 4.0, 7.5 Hz, 2 H), 2.40 (q,  $J$  = 7.0 Hz, 2 H), 1.19 (s, 9 H).

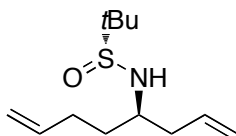

**( $R_S$ , 4 $R$ )-2-Methyl- $N$ -(octa-1,7-dien-4-yl)propane-2-sulfinamide (**S5**).** A flame-dried flask was cooled under a stream of  $N_2$  and charged with freshly ground magnesium turnings (720 mg, 4 equiv). The magnesium was suspended in ether (14.8 mL, 1 M), cooled to 0 °C in an ice/water bath and allyl bromide (1.28 mL, 14.8 mmol) was added dropwise. After addition, the ice bath was removed, and the reaction mixture was stirred at rt for 30 min. Stirring was stopped and the solution was filtered through glass wool prior to addition to **S4**. A flame-dried flask was cooled under a stream of  $N_2$  and charged with **S4** (1.38 g, 7.4 mmol) and THF (37 mL, 0.2 M). The sulfinyl imine solution was cooled to 0 °C in an ice/water bath before the filtered Grignard reagent solution was added dropwise. The reaction mixture was stirred at 0 °C until the starting material had been completely consumed as judged by TLC analysis (1 h). Water was then added dropwise until precipitation of magnesium salts occurred and the resulting solution was decanted into a separate flask. The solution was dried over anhydrous sodium sulfate, filtered, and concentrated *in vacuo*. Analysis of the crude product by  $^1H$  NMR indicated that a 10:1 mixture of diastereomers had formed. The crude material was purified by flash chromatography on silica gel to afford 1.02 g (60%) of the title compound as a 10:1 mixture of diastereomers as a clear colorless oil. Data are for the major isomer.  $^1H$  NMR (500 MHz,  $CDCl_3$ )  $\delta$  5.83–5.74 (m, 2 H), 5.18–4.97 (m, 4 H), 3.36–3.32 (m, 1 H), 3.21 (d,  $J$  = 6.5 Hz, 1 H), 2.45–2.40 (m, 1 H), 2.37–2.32 (m, 1 H), 2.18–2.08 (m, 2 H), 1.62–1.58 (m, 2 H), 1.21 (s, 9 H).

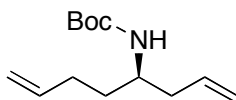

**( $R$ )-tert-Butyl octa-1,7-dien-4-ylcarbamate (**S1**).** A flame-dried flask was cooled under a stream of  $N_2$  and charged with **S5** (1.02 g, 4.4 mmol) and methanol (22 mL). A solution of anhydrous hydrochloric acid (4.4 mL, 17.7 mmol, 4 M in dioxane) was added and the mixture was stirred at rt for 1 h, at which time TLC analysis indicated that the starting material had been

completely consumed. The reaction mixture was diluted with water (10 mL) and CH<sub>2</sub>Cl<sub>2</sub> (10 mL), basified with NH<sub>4</sub>OH to pH > 12, and transferred to a separatory funnel. The layers were separated and the aqueous layer was extracted with CH<sub>2</sub>Cl<sub>2</sub> (3 x 5 mL). The combined organic layers were dried over anhydrous sodium sulfate, filtered, and concentrated *in vacuo*. The crude product was dissolved in THF (44 mL, 0.1 M), solid di-*tert*-butyldicarbonate (1.2 g, 5.3 mmol) was added and the reaction mixture was stirred at rt for 3 h. 1 M NaOH (5 mL) was added and the resulting biphasic mixture was stirred for 1 h at rt. The mixture was transferred to a separatory funnel, the layers were separated and the aqueous layer was extracted with ethyl acetate (3 x 20 mL). The combined organic layers were dried over anhydrous sodium sulfate, filtered, and concentrated *in vacuo*. The crude material was purified by flash chromatography on silica gel to afford 941 mg (94%) of the title compound as a clear colorless oil. The spectroscopic properties of this compound were identical to that of compound ( $\pm$ )-**S1** described above.

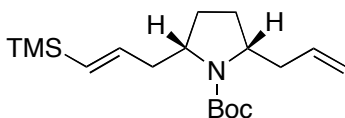

**(*E,2R,5S*)-*tert*-Butyl 2-allyl-5-[3-(trimethylsilyl)allyl]pyrrolidine-1-carboxylate (**S2**)**. A flame-dried Schlenk flask was cooled under a stream of N<sub>2</sub> and charged with Pd<sub>2</sub>(dba)<sub>3</sub> (77 mg, 0.084 mmol), tri(2-furyl)phosphine (77 mg, 0.33 mmol) and NaOtBu (802 mg, 8.4 mmol). The flask was purged with N<sub>2</sub>, then a solution of (**R**)-**S1** (941 mg, 4.2 mmol) in freshly distilled xylenes (21 mL) was added via syringe and the resulting mixture was stirred at rt for 2 min. (*E*)-(2-bromovinyl)trimethylsilane (1.28 mL, 8.4 mmol) was added and the flask was heated to 140 °C and stirred for 3 h. The mixture was cooled to room temperature and saturated aqueous NH<sub>4</sub>Cl (10 mL) and ethyl acetate (10 mL) were added. The layers were separated, the organic layer was filtered through a plug of silica gel, and the silica gel was washed with ethyl acetate (20 mL). The filtrate was dried over anhydrous sodium sulfate, filtered, and concentrated *in vacuo*. The crude material was purified by flash chromatography on silica gel to afford 647 g (48%) of the title compound as a dark brown oil. The spectroscopic properties of this compound were identical to that of compound ( $\pm$ )-**S2** described above.

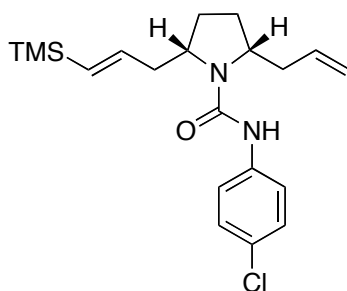

**(E,2R,5S)-2-Allyl-N-(4-chlorophenyl)-5-[3-(trimethylsilyl)allyl]pyrrolidine-1-carboxamide**

**(S6)**. A round-bottom flask equipped with a stirbar was charged with **(E,2R,5S)-S2** (647 mg, 2.0 mmol) and dichloromethane (20 mL, 0.1 M). Trifluoroacetic acid (2.0 mL, 1.0 M) was added to the flask and the mixture was stirred for 20 min at rt. The solution was diluted with water, basified with  $\text{NH}_4\text{OH}$  to  $\text{pH} > 12$ , and transferred to a separatory funnel. The layers were separated and the aqueous layer was extracted with  $\text{CH}_2\text{Cl}_2$  (3 x 5 mL). The combined organic layers were dried over anhydrous sodium sulfate, filtered, and concentrated *in vacuo*. The crude product was dissolved in dichloromethane (20 mL, 0.1 M) and 4-chlorophenyl isocyanate (369 mg, 1.2 equiv) was added. The reaction mixture was stirred at rt for 1 h until starting material had been completely consumed as judged by TLC analysis. The crude reaction mixture was concentrated *in vacuo*, and purified by flash chromatography on silica gel to afford 244 mg (32%) of the title compound as a orange brown oil.  $^1\text{H}$  NMR (500 MHz,  $\text{CDCl}_3$ )  $\delta$  7.31 (d,  $J = 9.0$  Hz, 2 H), 7.22 (d,  $J = 9.0$  Hz, 2 H), 6.41 (s, 1 H), 6.04 (dt,  $J = 7.0, 18.5$  Hz, 1 H), 5.93–5.84 (m, 1 H), 5.82 (d,  $J = 18.5$  Hz, 1 H), 5.22–5.17 (m, 2 H), 4.02–3.95 (m, 2 H), 2.61–2.52 (m, 2 H), 2.35 (dt,  $J = 7.0, 13.5$  Hz, 1 H), 2.24 (dt,  $J = 7.5, 14.0$  Hz, 1 H), 2.02–1.96 (m, 2 H), 1.80–1.74 (m, 2 H), 0.05 (s, 9 H).

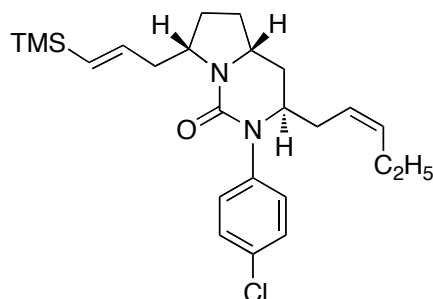

**(E,Z,3R,4aR,7S)-2-(4-Chlorophenyl)-3-(pent-2-en-1-yl)-7-[3-**

**(trimethylsilyl)allyl]hexahydropyrrolo[1,2-c]pyrimidin-1(2H)-one (S7)**. A flame-dried Schlenk tube was cooled under vacuum and charged with  $\text{Pd}_2(\text{dba})_3$  (3.1 mg, 0.003 mmol),  $\text{PCy}_3\cdot\text{HBF}_4$  (5.0 mg, 0.014 mmol) and  $\text{NaOtBu}$  (25 mg, 0.26 mmol). The flask was evacuated and purged with  $\text{N}_2$ . A solution of **S6** (65 mg, 0.17 mmol) in toluene (0.85 mL) was added via syringe and

the resulting mixture was stirred at rt for 2 min. (Z)-1-bromobut-1-ene (130  $\mu$ L, 0.26 mmol, 2.0 M solution in toluene) was added and the tube was heated to 100  $^{\circ}$ C and stirred until the starting material was completely consumed as judged by TLC analysis (1 h). The mixture was cooled to room temperature and saturated aqueous  $\text{NH}_4\text{Cl}$  (1 mL) and ethyl acetate (1 mL) were added. The layers were separated, the organic layer was filtered through a plug of silica gel, and the silica gel was washed with ethyl acetate (1 mL). The filtrate was dried over anhydrous sodium sulfate, filtered, and concentrated *in vacuo*. The crude material was purified by flash chromatography on silica gel to afford 53 mg (71%) of the title compound as a yellow oil.  $^1\text{H}$  NMR (500 MHz,  $\text{CDCl}_3$ )  $\delta$  7.31 (d,  $J$  = 9.0 Hz, 2 H), 7.19 (d,  $J$  = 9.0 Hz, 2 H), 5.94 (ddd,  $J$  = 6.0, 7.5, 18.5 Hz, 1 H), 5.68 (d,  $J$  = 18.5 Hz, 1 H), 5.47–5.42 (m, 1 H), 5.12–5.07 (m, 1 H), 4.03 (dt,  $J$  = 2.5, 8.5 Hz, 1 H), 3.90 (dt,  $J$  = 4.5, 9.5 Hz, 1 H), 3.66 (ddt,  $J$  = 2.5, 5.0, 11.5 Hz, 1 H), 2.73 (dd,  $J$  = 5.5, 12.5 Hz, 1 H), 2.27–2.16 (m, 4 H), 2.01–1.89 (m, 4 H), 1.84–1.81 (m, 1 H), 1.69–1.61 (m, 2 H), 0.90 (t,  $J$  = 7.5 Hz, 3 H), 0.03 (s, 9 H).

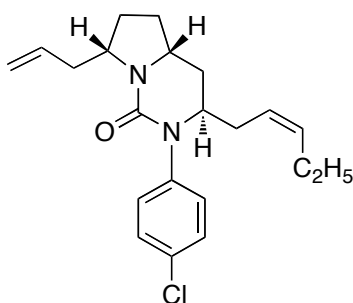

**(+)-(Z,3R,4aR,7S)-7-Allyl-2-(4-chlorophenyl)-3-(pent-2-en-1-yl)hexahydropyrrolo[1,2-c]pyrimidin-1(2H)-one (*ent*-8c).** A Schlenk tube was charged with **S7** (53 mg, 0.12 mmol) and  $\text{CH}_2\text{Cl}_2$  (1.2 mL). TFA (0.6 mL) was added and the reaction mixture was stirred overnight at 40  $^{\circ}$ C. The reaction mixture was then cooled to rt, diluted with water (1 mL), and basified with  $\text{NH}_4\text{OH}$  to pH > 12. The reaction mixture was transferred to a separatory funnel and the layers were separated. The organic layer was dried over anhydrous sodium sulfate, filtered, and concentrated *in vacuo*. The crude material was purified by flash chromatography on silica gel. This procedure afforded 29 mg (67%) of the title compound as a yellow oil:  $[\alpha]_D^{23} +17.7$  (c 2.9,  $\text{CH}_2\text{Cl}_2$ ). The spectroscopic properties of this compound were identical to that of compound **8c**. The enantiopurity was determined to be 10:90 er by chiral HPLC analysis (chiralcel ADH, 25 cm x 4.6 mm, 5% IPA/Hexanes, 0.75 mL/min,  $\lambda$  190 nm, RT= 13.4 and 17.8 min).

## References

- [1] H. Harada, R. K. Thalji, R. G. Bergman, J. A. Ellman, *J. Org. Chem.* **2008**, *73*, 6772–6779.
- [2] S. Hanessian, A. Tehim, P. Chen, *J. Org. Chem.* **1993**, *58*, 7768–7781.
- [3] S. J. Veenstra, P. Schmid, *Tetrahedron Lett.* **1997**, *38*, 997–1000.
- [4] G. Liu, D. A. Cogan, T. D. Owens, T. P. Tang, J. A. Ellman, *J. Org. Chem.* **1999**, *64*, 1278–1284.
- [5] N. R. Babij, J. P. Wolfe, *Angew. Chem.* **2012**, *124*, 4204–4206; *Angew. Chem. Int. Ed.* **2012**, *51*, 4128–4130.

Sample Name:  
Data Collected on:  
Sn.Chem.LSA.UMich.edu-inova500  
Archive directory:  
Sample directory:  
FidFile: NRB-4-1-1H  
Pulse Sequence: PROTON (s2pul)  
Solvent: cdcl3  
Data collected on: Sep 26 2012

Agilent Technologies

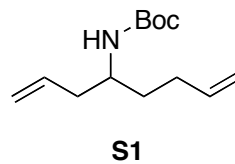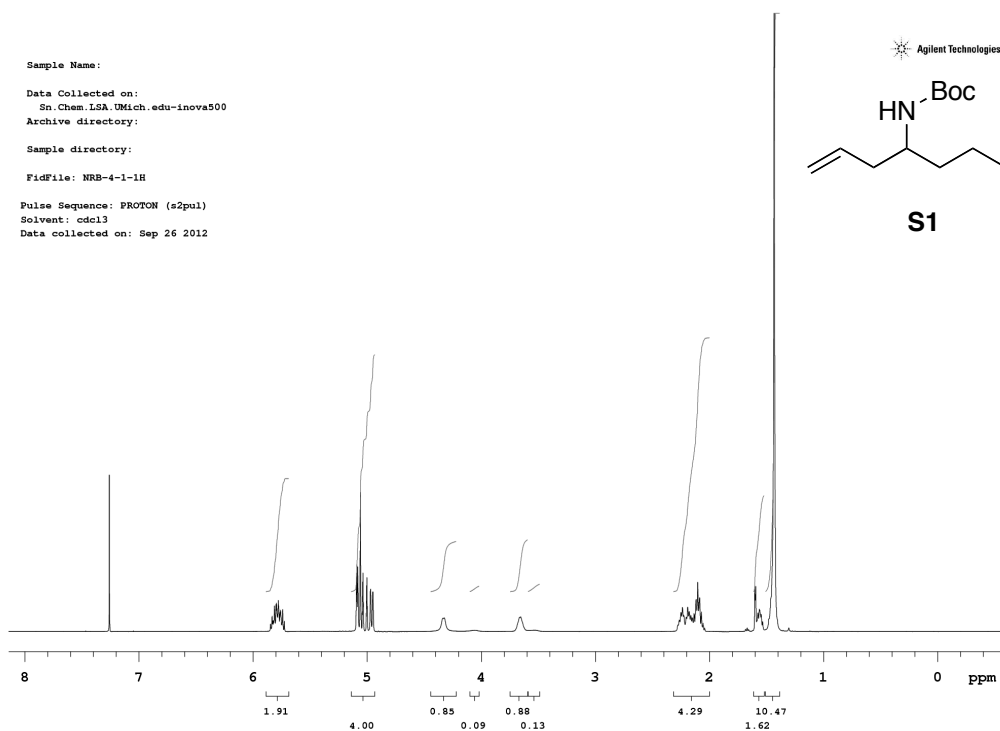

Sample Name:  
Data Collected on:  
Yb-vnmrs700  
Archive directory:  
Sample directory:  
FidFile: NRB-4-1-13C  
Pulse Sequence: CARBON (s2pul)  
Solvent: cdcl3  
Data collected on: Sep 27 2012

Agilent Technologies

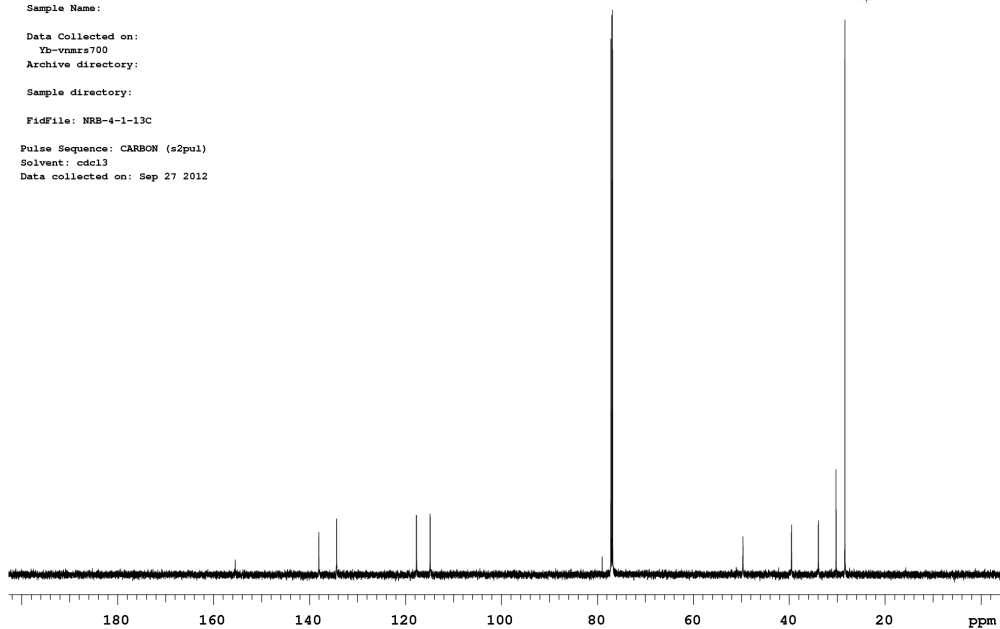

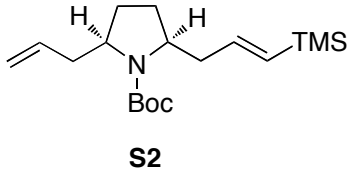

Sample Name:  
 Data Collected on:  
 Sn.Chem.LSA.Umich.edu-inova900  
 Archive directory:  
 Sample directory:  
 FidFile: NRB-4-88-1H  
 Pulse Sequence: PROTON (s2pul)  
 Solvent: cdcl3  
 Data collected on: Sep 22 2012

Agilent Technologies

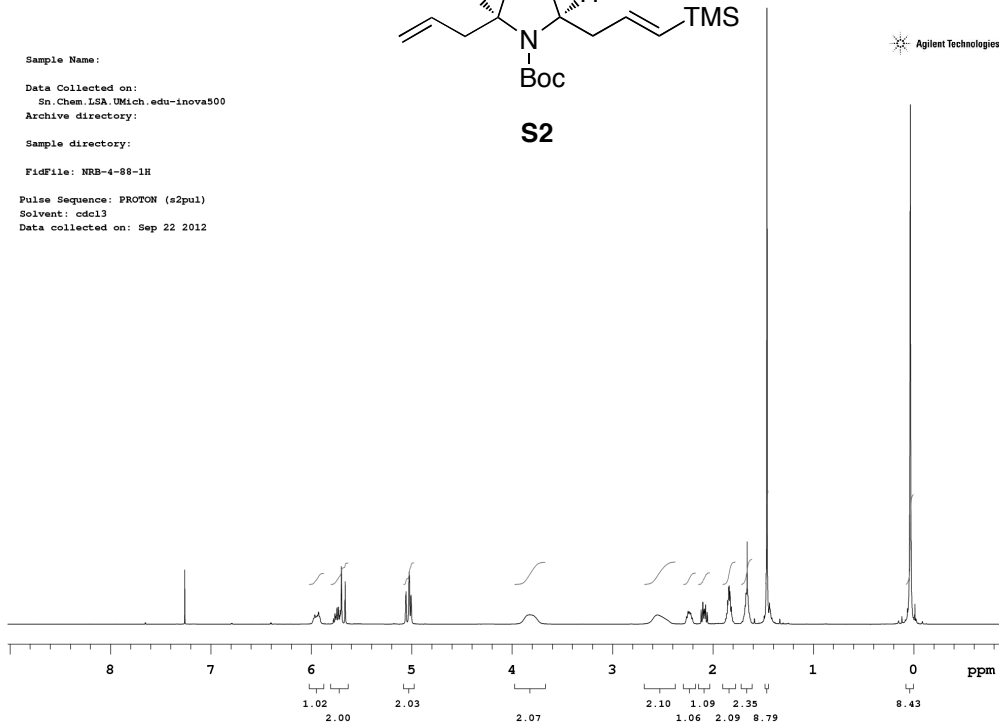

Sample Name:  
 Data Collected on:  
 Sn.Chem.LSA.Umich.edu-inova500  
 Archive directory:  
 Sample directory:  
 FidFile: NRB-4-88-13C  
 Pulse Sequence: CARBON (s2pul)  
 Solvent: cdcl3  
 Data collected on: Sep 22 2012

Agilent Technologies

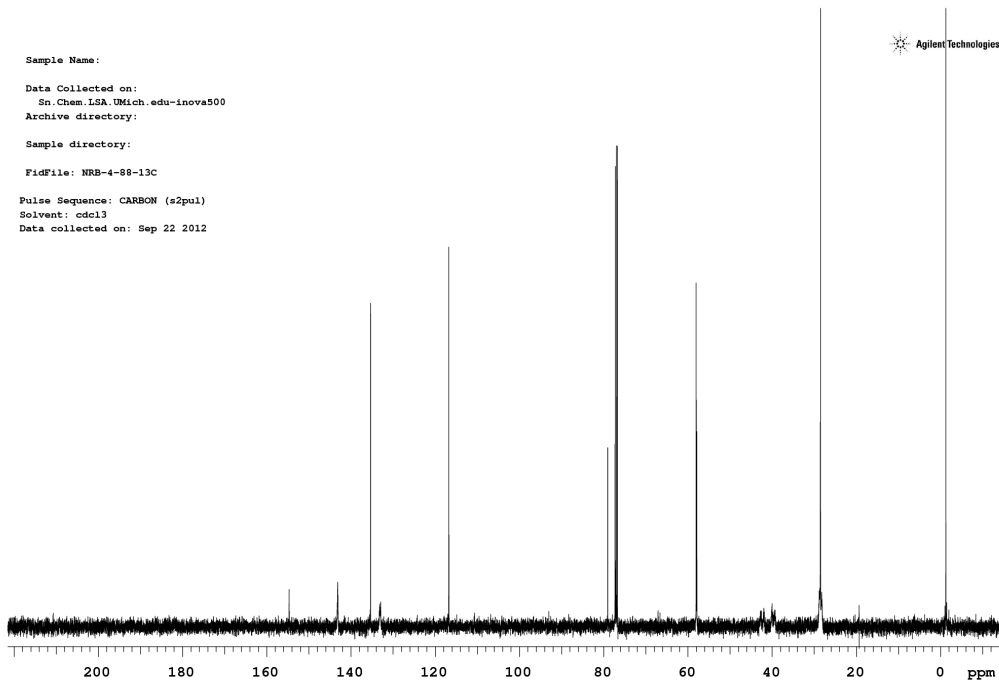



Sample Name:  
Data Collected on:  
Yb-vnars700  
Archive directory:  
Sample directory:  
FidFile: NRB-4-100-A-1H  
Pulse Sequence: PROTON (s2pu1)  
Solvent: cdcl3  
Data collected on: Oct 16 2012

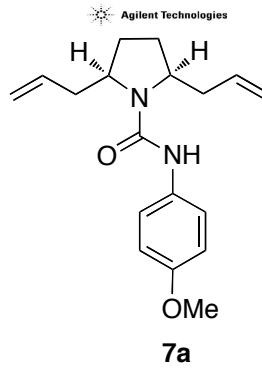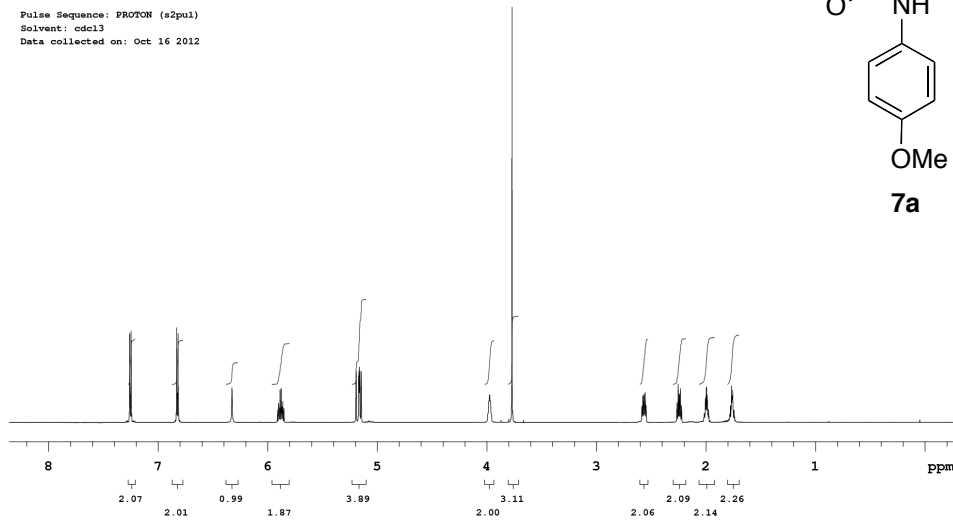

Sample Name:  
Data Collected on:  
Yb-vnars700  
Archive directory:  
Sample directory:  
FidFile: NRB-4-100-A-13C  
Pulse Sequence: CARBON (s2pu1)  
Solvent: cdcl3  
Data collected on: Oct 16 2012

Agilent Technologies

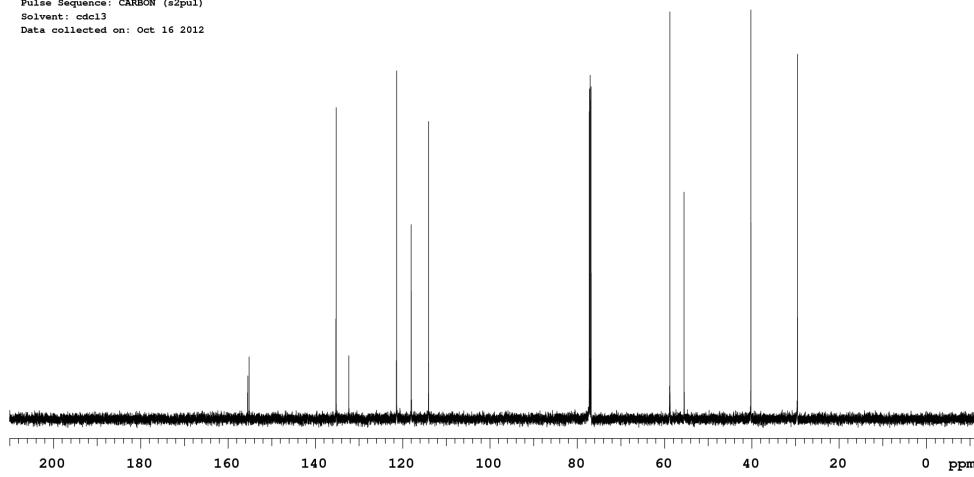

Sample Name:  
 Data Collected on:  
 Yb-vnmrs700  
 Archive directory:  
 Sample directory:  
 FidFile: NRB-4-100-B-1H  
 Pulse Sequence: PROTON (s2pu1)  
 Solvent: cdcl3  
 Data collected on: Oct 16 2012

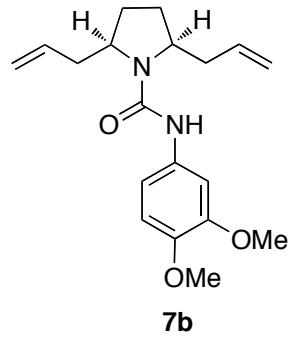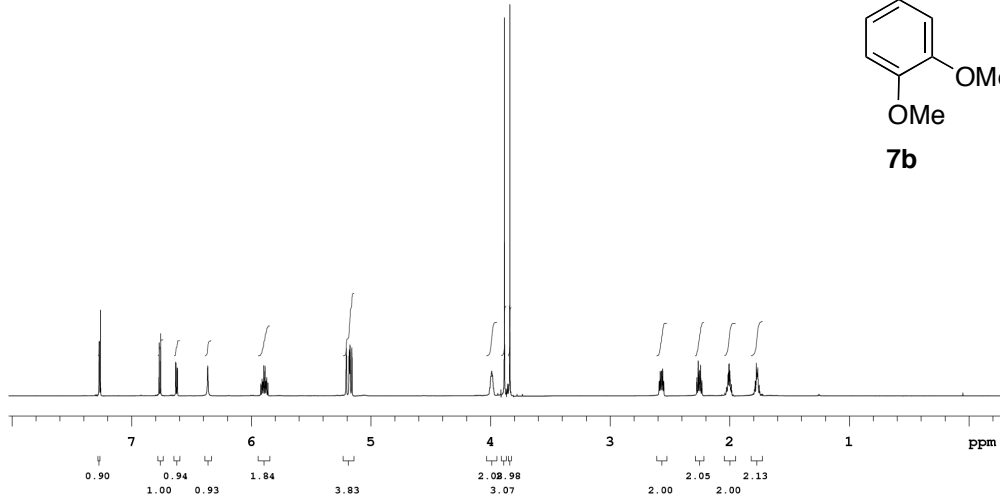

Sample Name:  
 Data Collected on:  
 Yb-vnmrs700  
 Archive directory:  
 Sample directory:  
 FidFile: NRB-4-100-B-13C  
 Pulse Sequence: CARBON (s2pu1)  
 Solvent: cdcl3  
 Data collected on: Oct 16 2012

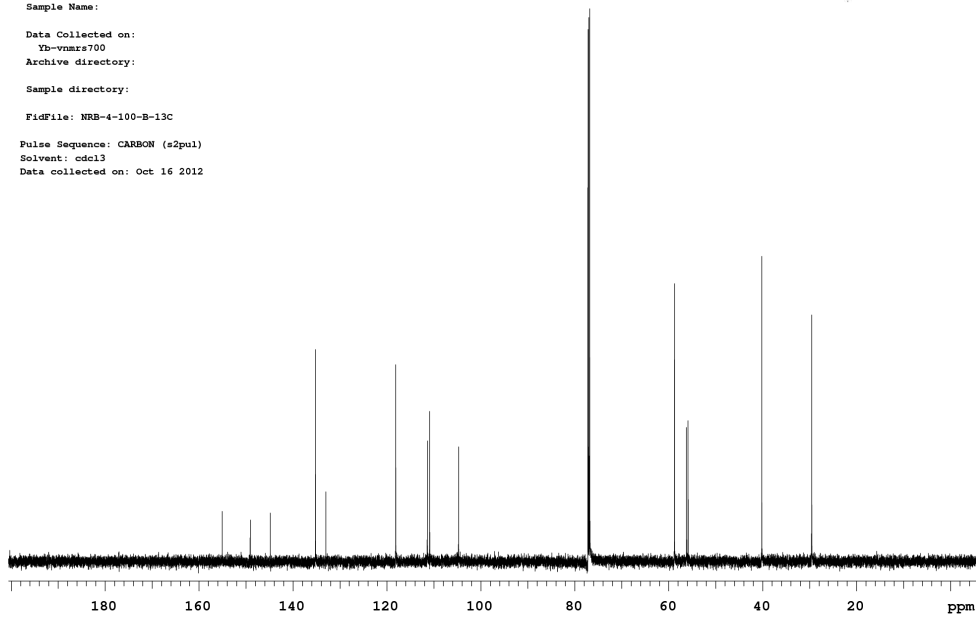

Sample Name:  
Data Collected on:  
Yb-vnmrs700  
Archive directory:  
Sample directory:  
FidFile: NRB-4-135-sm  
Pulse Sequence: PROTON (s2pul)  
Solvent: cdcl3  
Data collected on: Dec 21 2012

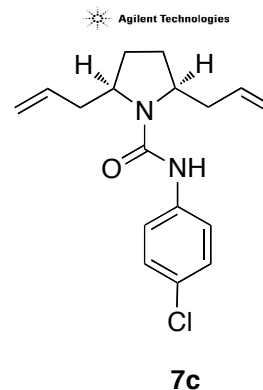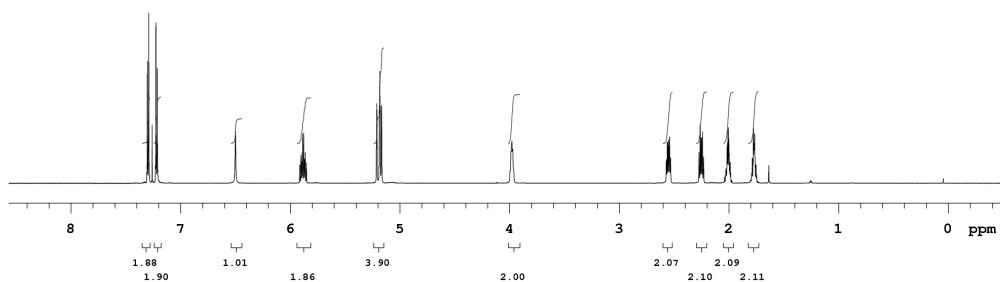

Sample Name:  
Data Collected on:  
Sn Chem 15A UMich.edu-inova500  
Archive directory:  
Sample directory:  
FidFile: NRB-4-79-sm-13C  
Pulse Sequence: CARBON (s2pul)  
Solvent: cdcl3  
Data collected on: Sep 12 2012

Agilent Technologies

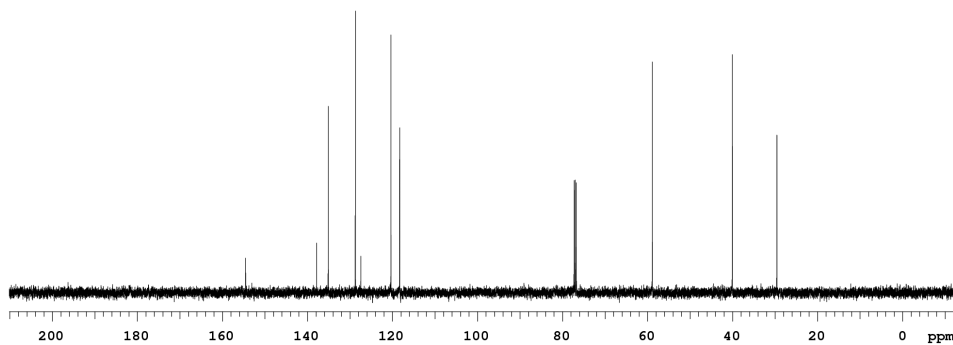

Sample Name:  
Data Collected on:  
Yb-vnmrs700  
Archive directory:  
Sample directory:  
FidFile: NRB-4-100-C  
Pulse Sequence: PROTON (s2pul)  
Solvent: cdcl3  
Data collected on: Oct 16 2012

Agilent Technologies

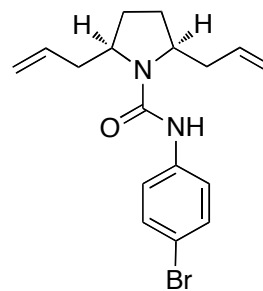

7d

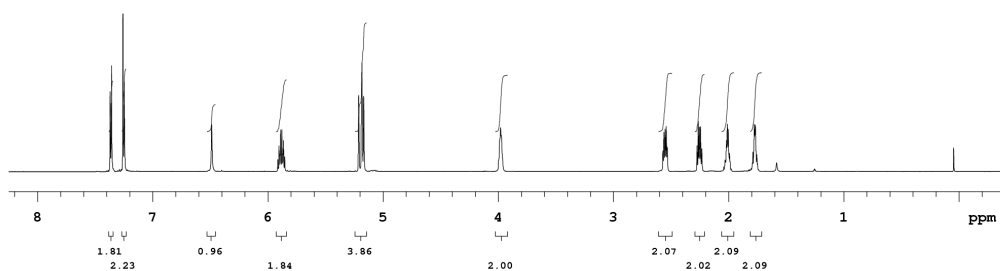

Sample Name:  
Data Collected on:  
Yb-vnmrs700  
Archive directory:  
Sample directory:  
FidFile: NRB-4-100-C-13C  
Pulse Sequence: CARBON (s2pul)  
Solvent: cdcl3  
Data collected on: Oct 16 2012

Agilent Technologies

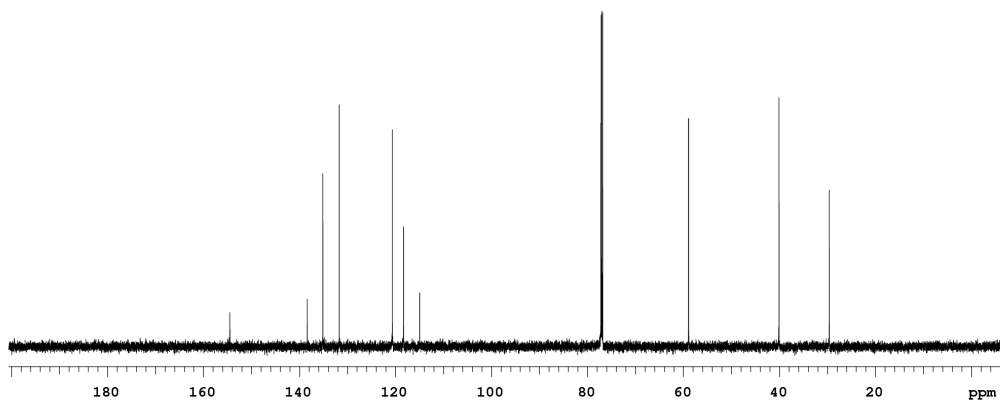

Sample Name:  
Data Collected on:  
Yb-vnmrs700  
Archive directory:  
Sample directory:  
FidFile: NRB-4-100-D-1H  
Pulse Sequence: PROTON (s2pul)  
Solvent: cdcl3  
Data collected on: Oct 16 2012

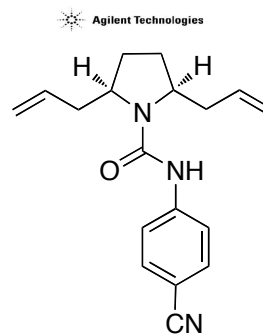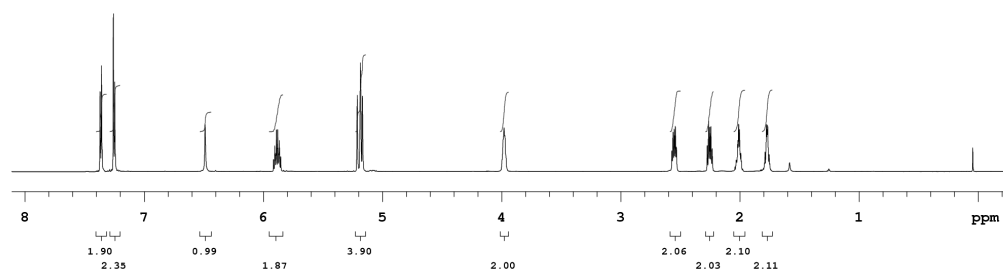

Sample Name:  
Data Collected on:  
Yb-vnmrs700  
Archive directory:  
Sample directory:  
FidFile: NRB-4-100-D-13C  
Pulse Sequence: CARBON (s2pul)  
Solvent: cdcl3  
Data collected on: Oct 16 2012

Agilent Technologies

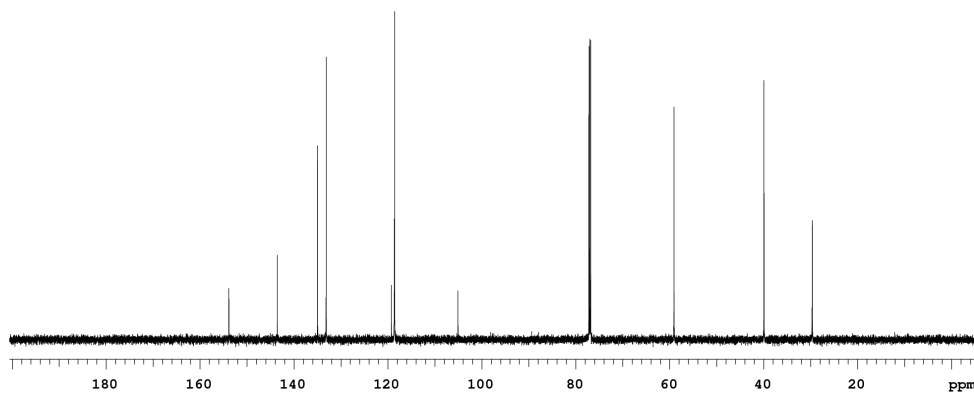

Sample Name:  
Data Collected on:  
Yb-vnmrs700  
Archive directory:  
Sample directory:  
FidFile: NRB-4-100-E-1H  
Pulse Sequence: PROTON (s2pul)  
Solvent: cdcl3  
Data collected on: Oct 16 2012

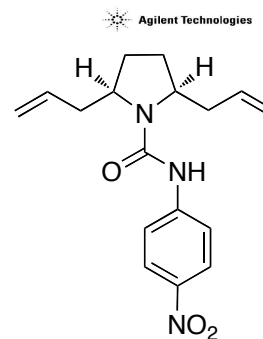

7f

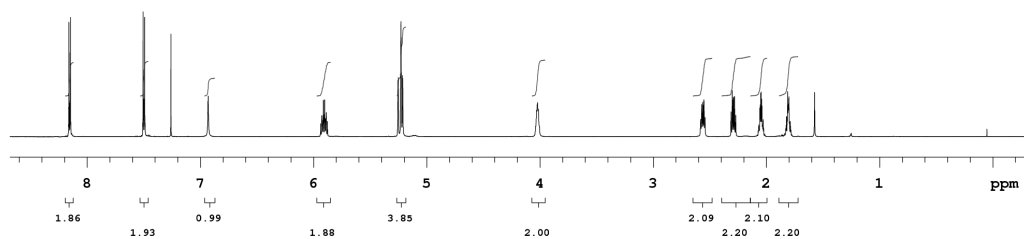

Sample Name:  
Data Collected on:  
Yb-vnmrs700  
Archive directory:  
Sample directory:  
FidFile: NRB-4-100-E-13C  
Pulse Sequence: CARBON (s2pul)  
Solvent: cdcl3  
Data collected on: Oct 16 2012

Agilent Technologies

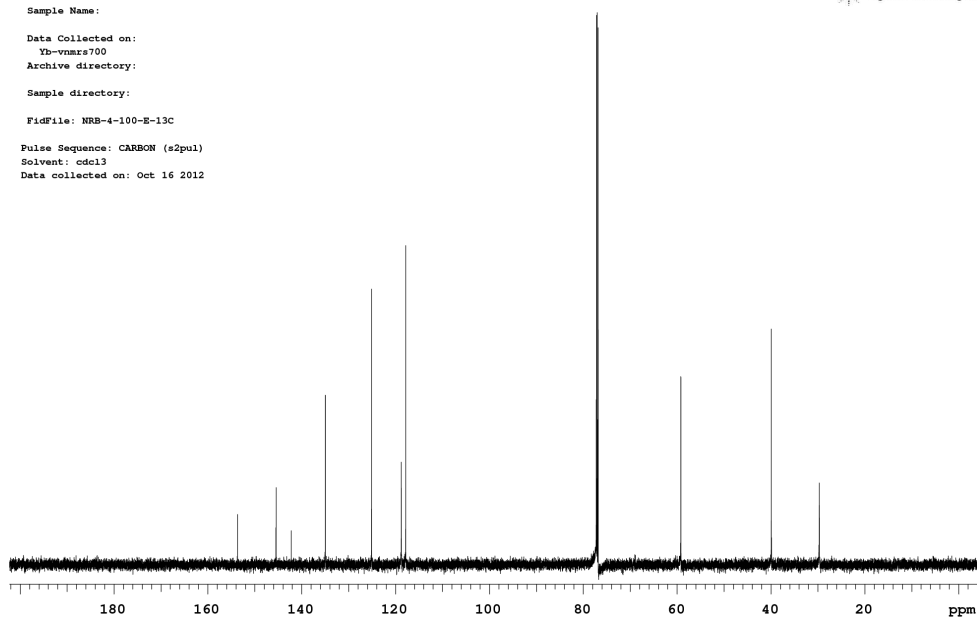

Sample Name:  
 Data Collected on:  
 Yb-vnmrs700  
 Archive directory:  
 Sample directory:  
 FidFile: NRB-4-22-X-1H  
 Pulse Sequence: PROTON (s2pul)  
 Solvent: cdcl3  
 Data collected on: Oct 18 2012

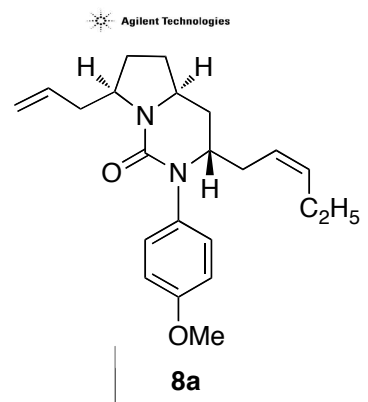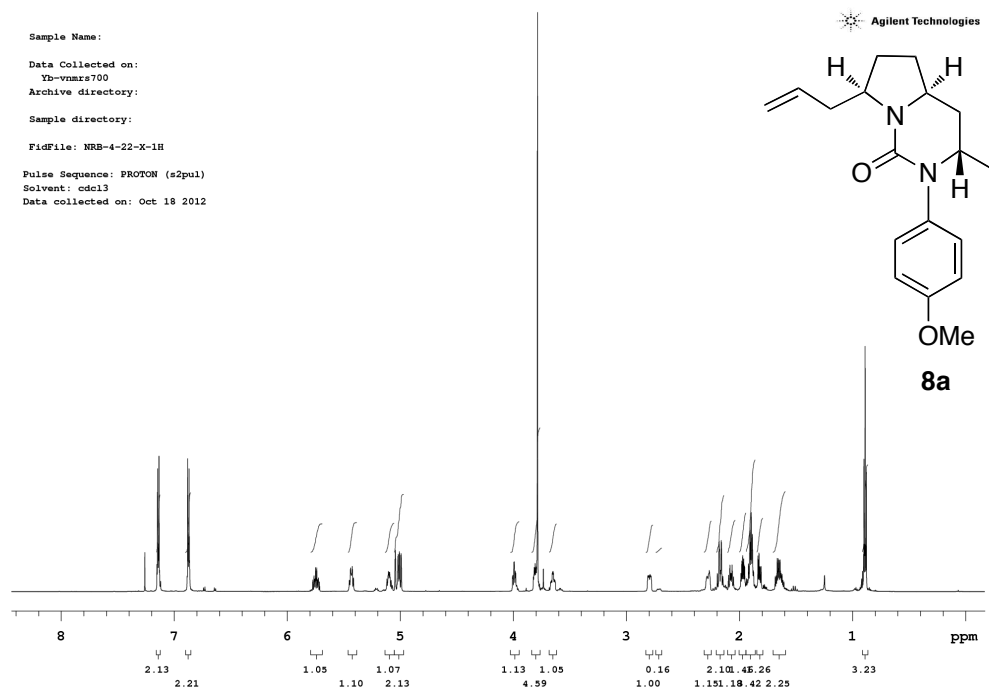

Sample Name:  
 Data Collected on:  
 Yb-vnmrs700  
 Archive directory:  
 Sample directory:  
 FidFile: NRB-4-22-X-13C  
 Pulse Sequence: CARBON (s2pul)  
 Solvent: cdcl3  
 Data collected on: Oct 18 2012

Agilent Technologies

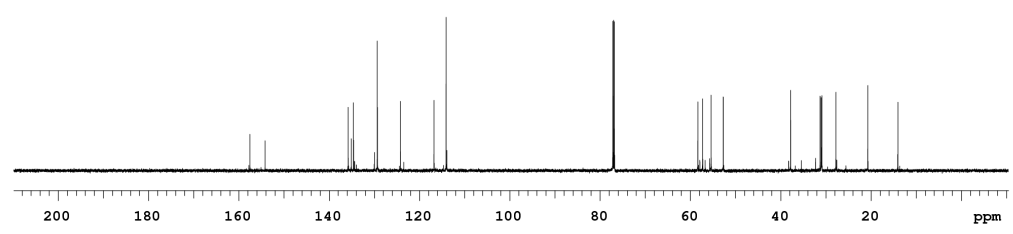

## ==== Shimadzu LCsolution Analysis Report ====

C:\LabSolutions\Data\BABI\IRACEMIC-NRB-4-11-PMP-Z-BUTENE-100-ADH-2.5%IPA-0.75ml\_min.lcd  
 Acquired by : Admin  
 Sample Name : RACEMIC-NRB-4-11-PMP-Z-BUTENE-100-ADH-2.5%IPA-0.75ml\_min  
 Sample ID : <SAMPLE>  
 Tray# : 1  
 Vial # : 1  
 Injection Volume : 1 uL  
 Data File Name : RACEMIC-NRB-4-11-PMP-Z-BUTENE-100-ADH-2.5%IPA-0.75ml\_min.lcd  
 Method File Name : Cyclic Urea Method.lcm  
 Batch File Name :  
 Report File Name : Default.lcr  
 Data Acquired : 10/24/2012 1:59:11 PM  
 Data Processed : 10/24/2012 2:54:56 PM

### <Chromatogram>

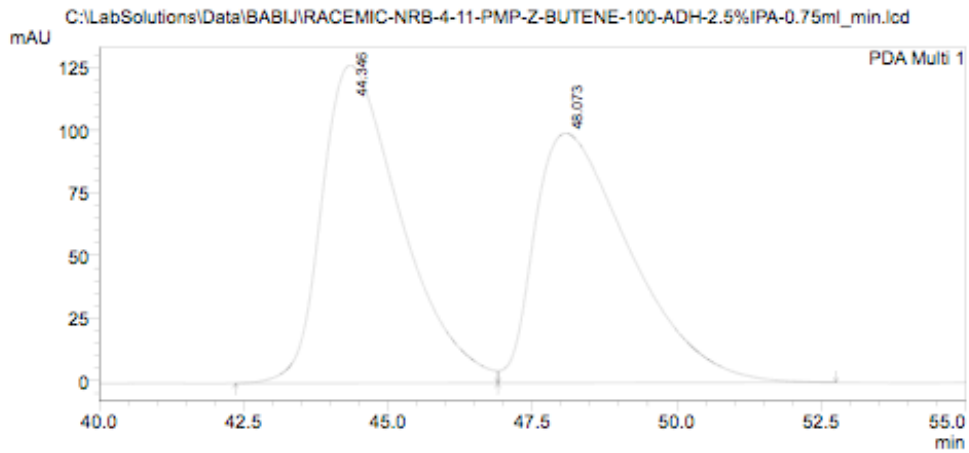

PeakTable

| Peak# | Ret. Time | Area     | Height | Area %  |
|-------|-----------|----------|--------|---------|
| 1     | 44.346    | 12121126 | 126849 | 51.297  |
| 2     | 48.073    | 11508366 | 99562  | 48.703  |
| Total |           | 23629492 | 226411 | 100.000 |

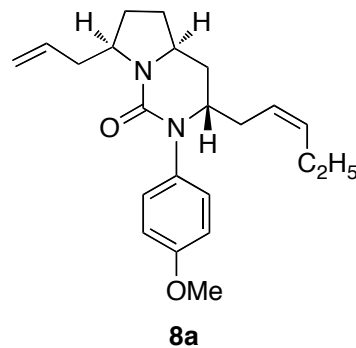



## ==== Shimadzu LCsolution Analysis Report ====

C:\LabSolutions\Data\BABI\CHIRAL-NRB-4-11-PMP-Z-BUTENE-90-SSIPHOSPE-ADH-2.5%IPA-0.75ml\_min.lcd  
 Acquired by : Admin  
 Sample Name : CHIRAL-NRB-4-11-PMP-Z-BUTENE-90-SSIPHOSP-ADH-2.5%IPA-0.75ml\_min  
 Sample ID : <SAMPLE>  
 Tray# : 1  
 Vial # : 1  
 Injection Volume : 1 uL  
 Data File Name : CHIRAL-NRB-4-11-PMP-Z-BUTENE-90-SSIPHOSPE-ADH-2.5%IPA-0.75ml\_min.lcd  
 Method File Name : Cyclic Urea Method.lcm  
 Batch File Name :  
 Report File Name : Default.lcr  
 Data Acquired : 5/2/2012 6:06:42 PM  
 Data Processed : 5/2/2012 7:02:07 PM

### <Chromatogram>

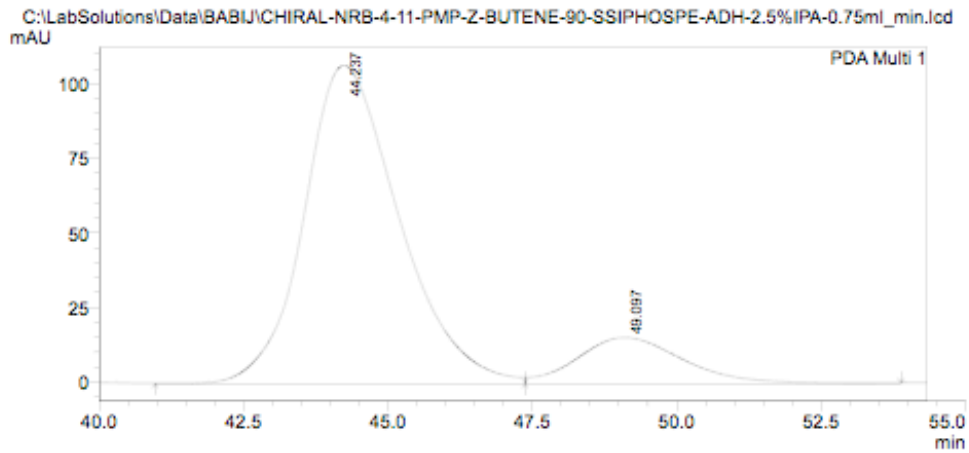

PeakTable

| Peak# | Ret. Time | Area     | Height | Area %  |
|-------|-----------|----------|--------|---------|
| 1     | 44.237    | 12187752 | 106584 | 86.224  |
| 2     | 49.097    | 1947258  | 15346  | 13.776  |
| Total |           | 14135011 | 121931 | 100.000 |

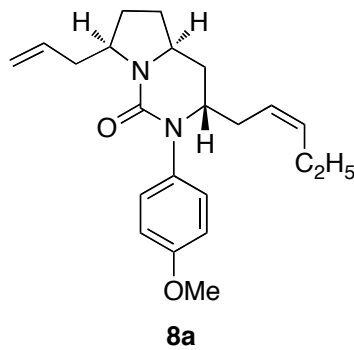

Sample Name:  
 Data Collected on:  
 Yb-vnmrs700  
 Archive directory:  
 Sample directory:  
 FidFile: NRB-4-101-X-1H  
 Pulse Sequence: PROTON (s2pu1)  
 Solvent: cdcl3  
 Data collected on: Oct 18 2012

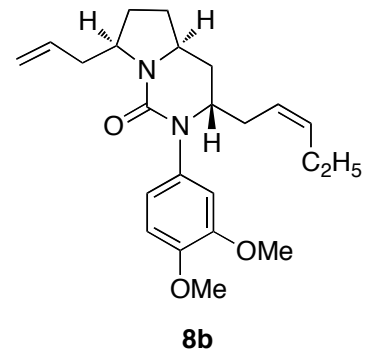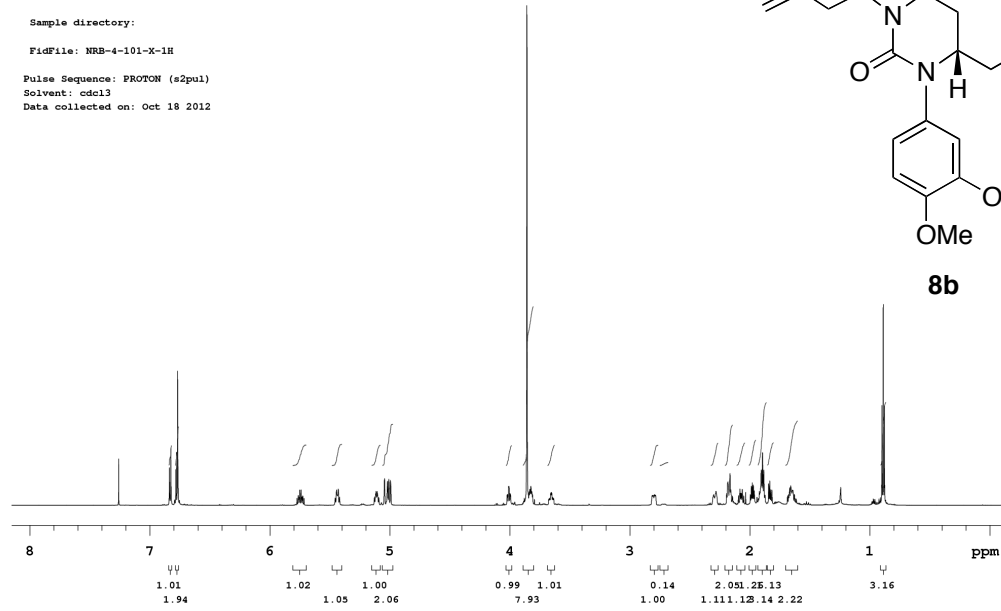

Sample Name:  
 Data Collected on:  
 Yb-vnmrs700  
 Archive directory:  
 Sample directory:  
 FidFile: NRB-4-101-X-13C  
 Pulse Sequence: CARBON (s2pu1)  
 Solvent: cdcl3  
 Data collected on: Oct 18 2012

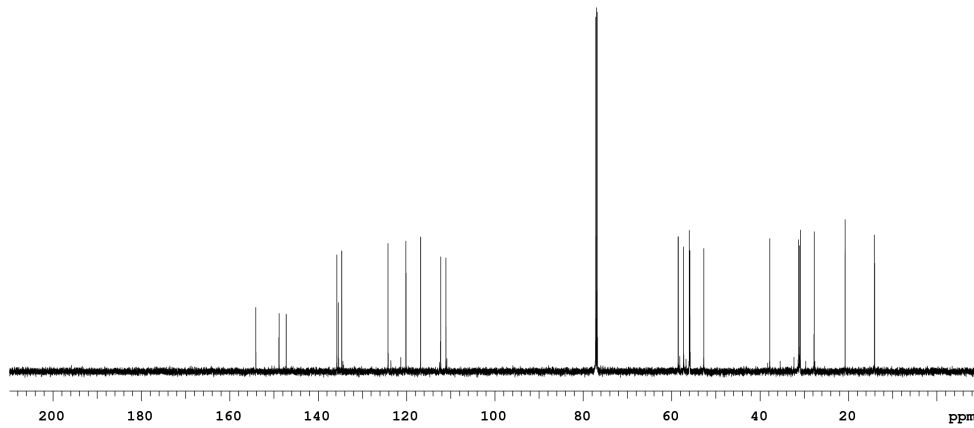

## ==== Shimadzu LCsolution Analysis Report ====

C:\LabSolutions\Data\BABI\RACEMIC-NRB-4-101-34PMP-Z-BUTENE-100-PCY3-ADH-5%IPA-0.75ml.lcd  
 Acquired by : Admin  
 Sample Name : RACEMIC-NRB-4-101-3,4PMP-Z-Butene-100C-ADH-5%IPA-0.75ml\_min  
 Sample ID : <SAMPLE>  
 Tray# : 1  
 Vial # : 1  
 Injection Volume : 1 uL  
 Data File Name : RACEMIC-NRB-4-101-34PMP-Z-BUTENE-100-PCY3-ADH-5%IPA-0.75ml.lcd  
 Method File Name : Cyclic Urea Method.lcm  
 Batch File Name :  
 Report File Name : Default.lcr  
 Data Acquired : 10/17/2012 3:45:42 PM  
 Data Processed : 10/17/2012 4:18:20 PM

### <Chromatogram>

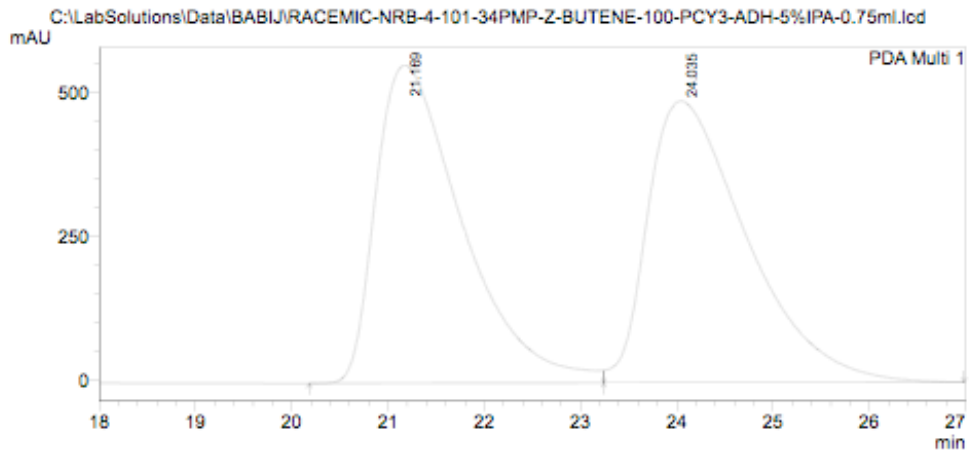

PeakTable

| Peak# | Ret. Time | Area     | Height  | Area %  |
|-------|-----------|----------|---------|---------|
| 1     | 21.169    | 34368966 | 550494  | 49.582  |
| 2     | 24.035    | 34947914 | 487647  | 50.418  |
| Total |           | 69316880 | 1038141 | 100.000 |

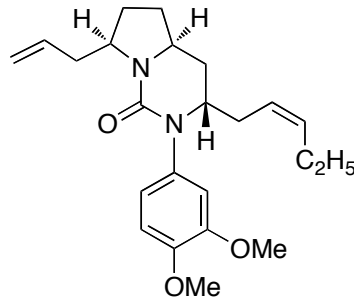

## ==== Shimadzu LCsolution Analysis Report ====

C:\LabSolutions\Data\BABIJ\CHIRAL-NRB-4-101-34PMP-Z-BUTENE-100-NaOtBu-SSIPHOSPE-5%IPA-0.75ml\_min.lcd  
 Acquired by : Admin  
 Sample Name : CHIRAL-NRB-4-101-34PMP-Z-BUTENE-100-NaOtBu-SSIPHOSPE-5%IPA-0.75  
 Sample ID : <SAMPLE>  
 Tray# : 1  
 Vial # : 1  
 Injection Volume : 1 uL  
 Data File Name : CHIRAL-NRB-4-101-34PMP-Z-BUTENE-100-NaOtBu-SSIPHOSPE-5%IPA-0.75ml\_min.lcd  
 Method File Name : Cyclic Urea Method.lcm  
 Batch File Name :  
 Report File Name : Default.lcr  
 Data Acquired : 10/17/2012 9:55:54 PM  
 Data Processed : 10/17/2012 10:28:13 PM

### <Chromatogram>

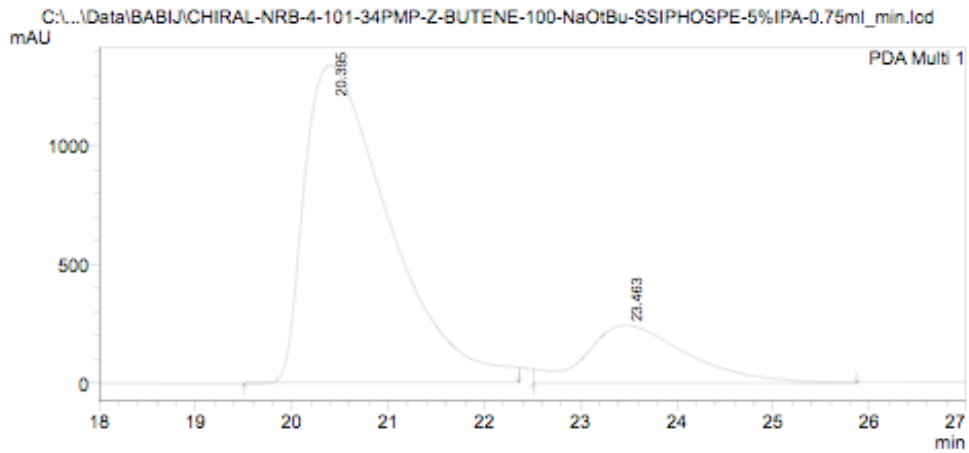

PeakTable

| Peak# | Ret. Time | Area      | Height  | Area %  | Height % |
|-------|-----------|-----------|---------|---------|----------|
| 1     | 20.395    | 81981175  | 1343363 | 81.873  | 84.618   |
| 2     | 23.463    | 18150993  | 244195  | 18.127  | 15.382   |
| Total |           | 100132168 | 1587557 | 100.000 | 100.000  |

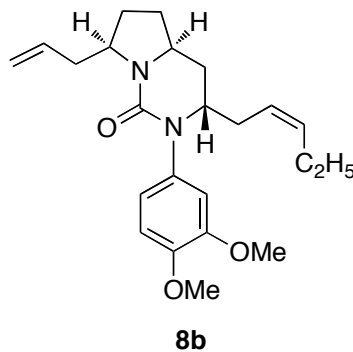

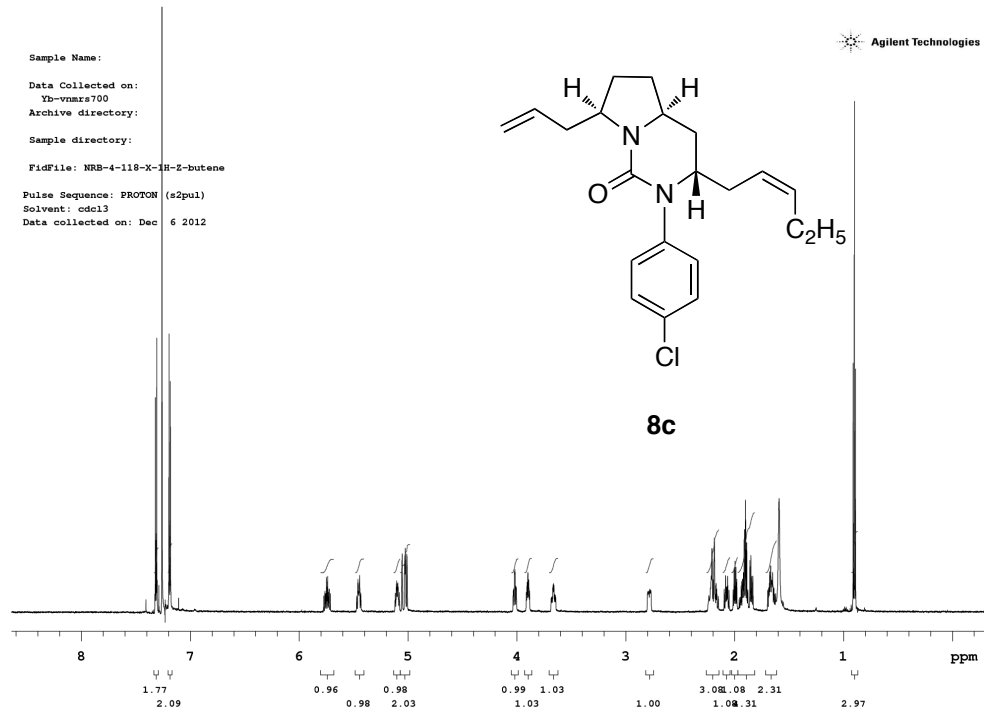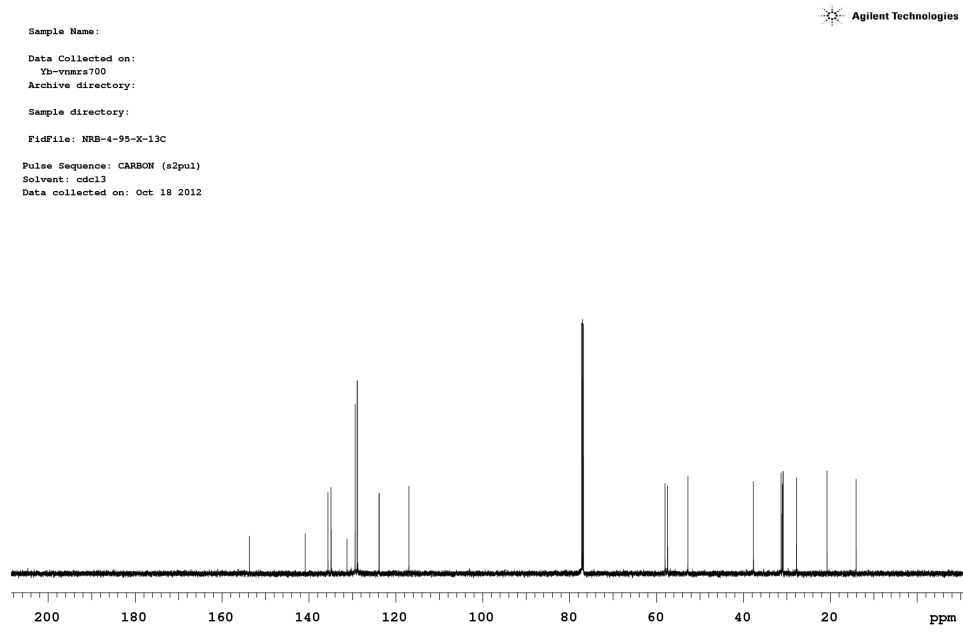

### ==== Shimadzu LCsolution Analysis Report ====

C:\LabSolutions\Data\BABI\RACEMIC-NRB-4-95-pCl-Z-BUTENE-100-PCY3-5%IPA-0.75ml\_min.lcd  
 Acquired by : Admin  
 Sample Name : RACEMIC-NRB-4-95-pCl-Z-BUTENE-100-PCY3-5%IPA-0.75ml\_min  
 Sample ID : <SAMPLE>  
 Tray# : 1  
 Vial # : 1  
 Injection Volume : 1 uL  
 Data File Name : RACEMIC-NRB-4-95-pCl-Z-BUTENE-100-PCY3-5%IPA-0.75ml\_min.lcd  
 Method File Name : Cyclic Urea Method.lcm  
 Batch File Name :  
 Report File Name : Default.lcr  
 Data Acquired : 10/10/2012 3:40:20 PM  
 Data Processed : 10/10/2012 4:01:04 PM

#### <Chromatogram>

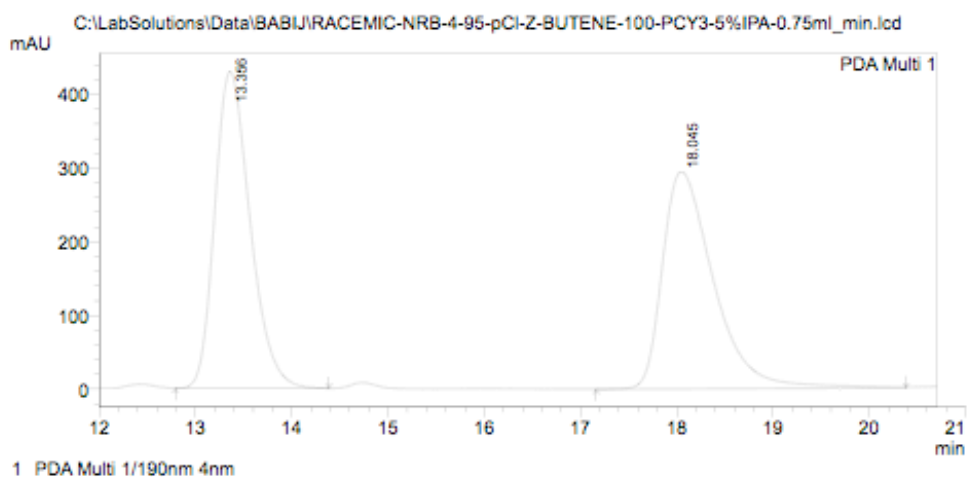

PDA Ch1 190nm 4nm

| Peak# | Ret. Time | Area     | Height | Area %  |
|-------|-----------|----------|--------|---------|
| 1     | 13.356    | 10978832 | 430437 | 50.161  |
| 2     | 18.045    | 10908139 | 295015 | 49.839  |
| Total |           | 21886971 | 725452 | 100.000 |

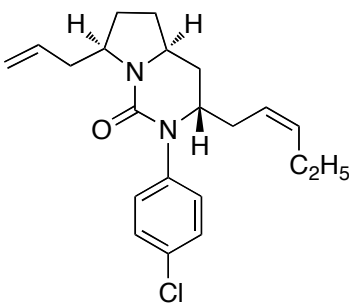

**8c**

## ==== Shimadzu LCsolution Analysis Report ====

C:\LabSolutions\Data\BABI\CHIRAL-NRB-4-118-pCl-Z-BUTENE-100-NaOtBu-SSIPHOSPE-5%IPA-0.75ml\_min.lcd  
 Acquired by : Admin  
 Sample Name : CHIRAL-NRB-4-118-pCl-Z-BUTENE-100-NaOtBu-SSIPHOSPE-5%IPA-0.75ml  
 Sample ID : <SAMPLE>  
 Tray# : 1  
 Vial # : 1  
 Injection Volume : 1 uL  
 Data File Name : CHIRAL-NRB-4-118-pCl-Z-BUTENE-100-NaOtBu-SSIPHOSPE-5%IPA-0.75ml\_min.lcd  
 Method File Name : Cyclic Urea Method.lcm  
 Batch File Name :  
 Report File Name : Default.lcr  
 Data Acquired : 11/30/2012 12:32:03 PM  
 Data Processed : 11/30/2012 1:30:42 PM

### <Chromatogram>

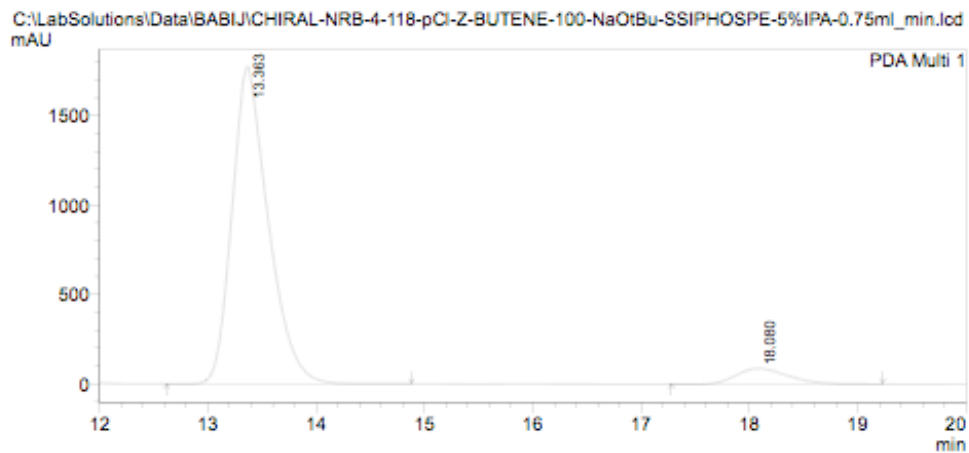

PeakTable

| Peak# | Ret. Time | Area     | Height  | Area %  |
|-------|-----------|----------|---------|---------|
| 1     | 13.363    | 40981053 | 1771633 | 94.402  |
| 2     | 18.080    | 2430175  | 83915   | 5.598   |
| Total |           | 43411228 | 1855548 | 100.000 |

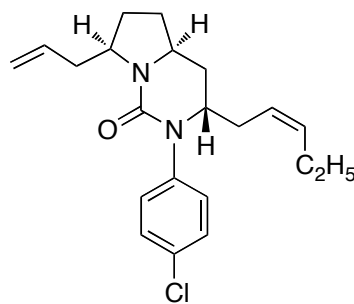

**8c**

### ==== Shimadzu LCsolution Analysis Report ====

C:\LabSolutions\Data\BABIJIELLMAN-NRB-4-133-2-pCl-Zbutene--5%IPA-0.75ml\_min.lcd  
 Acquired by : Admin  
 Sample Name : ELLMAN-NRB-4-133-2-pCl-Zbutene--5%IPA-0.75ml\_min  
 Sample ID : <SAMPLE>  
 Tray# : 1  
 Vial # : 1  
 Injection Volume : 1 uL  
 Data File Name : ELLMAN-NRB-4-133-2-pCl-Zbutene--5%IPA-0.75ml\_min.lcd  
 Method File Name : Cyclic Urea Method.lcm  
 Batch File Name :  
 Report File Name : Default.lcr  
 Data Acquired : 12/18/2012 11:59:32 AM  
 Data Processed : 12/18/2012 12:39:48 PM

#### <Chromatogram>

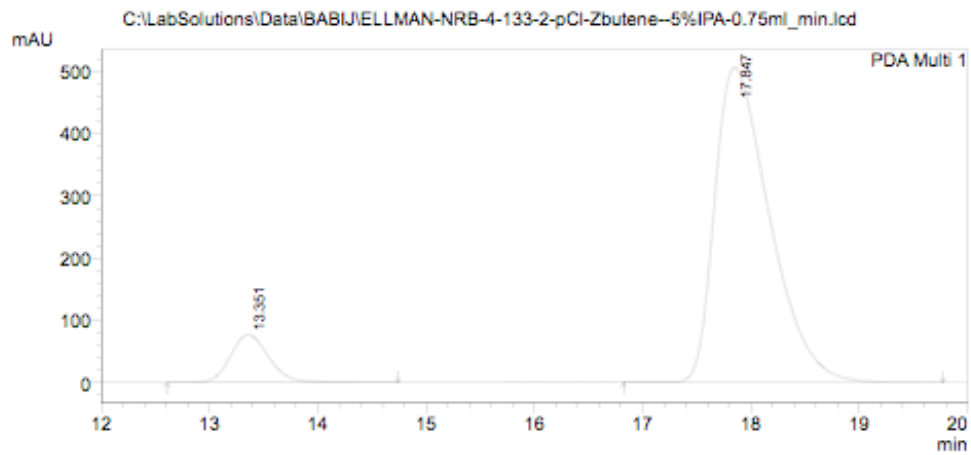

PeakTable

| Peak# | Ret. Time | Area     | Height | Area %  |
|-------|-----------|----------|--------|---------|
| 1     | 13.351    | 1900239  | 77384  | 9.636   |
| 2     | 17.847    | 17820385 | 506100 | 90.364  |
| Total |           | 19720624 | 583483 | 100.000 |

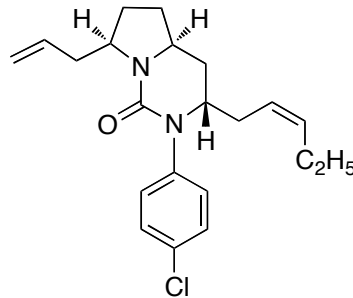

**ent-8c**



Sample Name:  
 Data Collected on:  
 Yb-vmars700  
 Archive directory:  
 Sample directory:  
 FidFile: PROTON  
 Pulse Sequence: PROTON (s2pul)  
 Solvent: cdcl3  
 Data collected on: Oct 20 2012

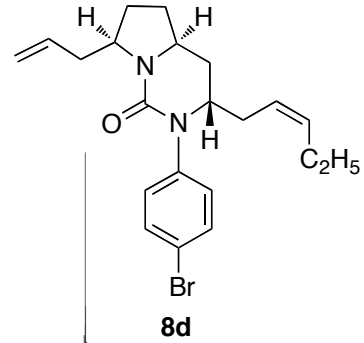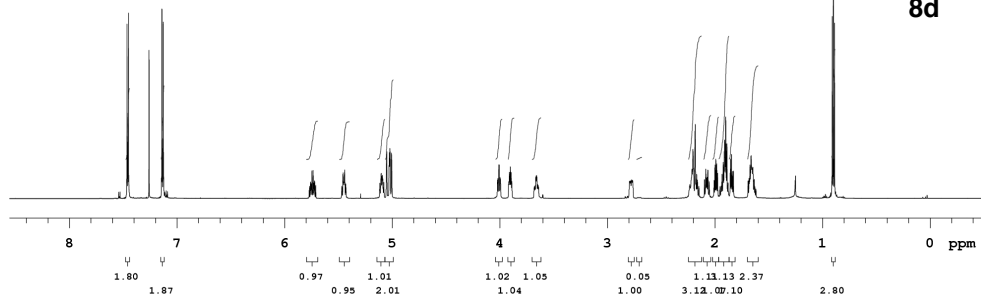

Sample Name:  
 Data Collected on:  
 Yb-vmars700  
 Archive directory:  
 Sample directory:  
 FidFile: NRB-4-103-13C  
 Pulse Sequence: CARBON (s2pul)  
 Solvent: cdcl3  
 Data collected on: Oct 20 2012

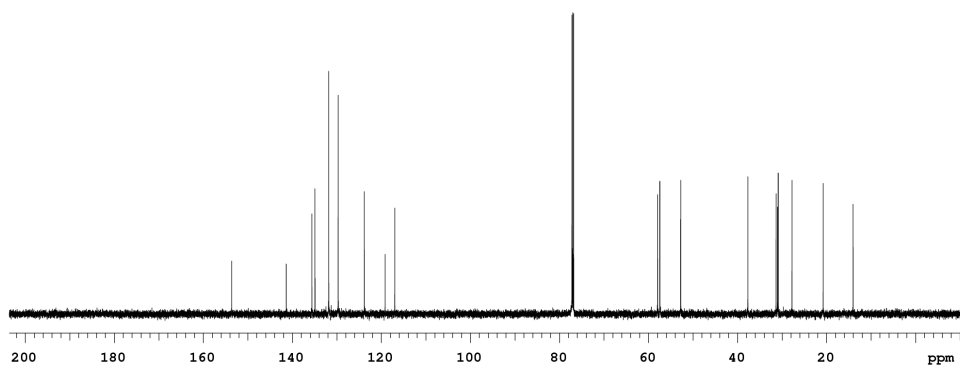

## ==== Shimadzu LCsolution Analysis Report ====

C:\LabSolutions\Data\BABIJRACEMIC-NRB-4-74-pBr-Z-BUTENE-100-PCY3-5%IPA-0.75ml\_min.lcd  
 Acquired by : Admin  
 Sample Name : RACEMIC-NRB-4-74-pBr-Z-BUTENE-100-PCY3-5%IPA-0.75ml\_min  
 Sample ID : <SAMPLE>  
 Tray# : 1  
 Vial # : 1  
 Injection Volume : 1 uL  
 Data File Name : RACEMIC-NRB-4-74-pBr-Z-BUTENE-100-PCY3-5%IPA-0.75ml\_min.lcd  
 Method File Name : Cyclic Urea Method.lcm  
 Batch File Name :  
 Report File Name : Default.lcr  
 Data Acquired : 8/28/2012 6:58:36 PM  
 Data Processed : 8/28/2012 7:25:17 PM

### <Chromatogram>

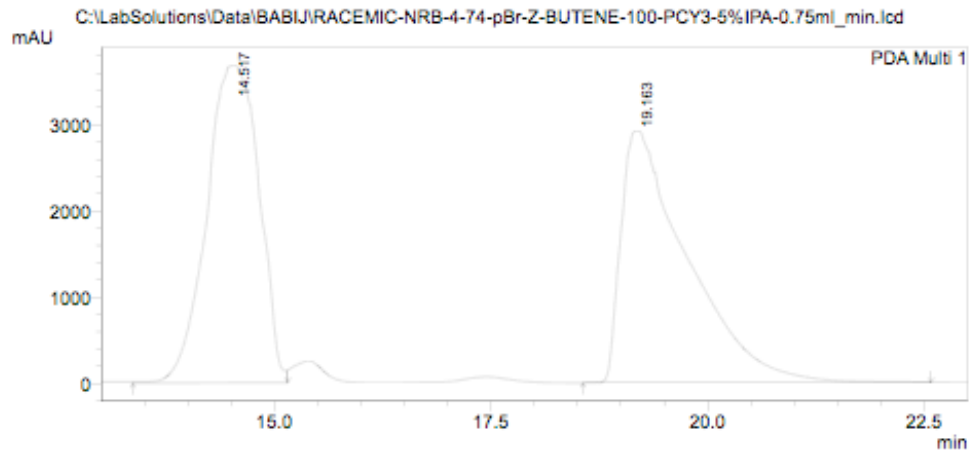

PeakTable

| Peak# | Ret. Time | Area      | Height  | Area %  |
|-------|-----------|-----------|---------|---------|
| 1     | 14.517    | 154799302 | 3681642 | 49.793  |
| 2     | 19.163    | 156088664 | 2926638 | 50.207  |
| Total |           | 310887966 | 6608280 | 100.000 |

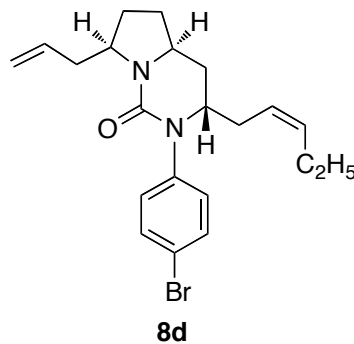

### ==== Shimadzu LCsolution Analysis Report ====

C:\LabSolutions\Data\BABI\CHIURAL-NRB-4-74-pBr-Z-BUTENE-100-SIPHOSPE-5%IPA-0.75ml\_min.lcd  
 Acquired by : Admin  
 Sample Name : CHIURAL-NRB-4-74-pBr-Z-BUTENE-100-SIPHOSPE-5%IPA-0.75ml\_min  
 Sample ID : <SAMPLE>  
 Tray# : 1  
 Vial # : 1  
 Injection Volume : 1 uL  
 Data File Name : CHIURAL-NRB-4-74-pBr-Z-BUTENE-100-SIPHOSPE-5%IPA-0.75ml\_min.lcd  
 Method File Name : Cyclic Urea Method.lcm  
 Batch File Name :  
 Report File Name : Default.lcr  
 Data Acquired : 8/28/2012 7:28:02 PM  
 Data Processed : 10/19/2012 7:38:06 PM

#### <Chromatogram>

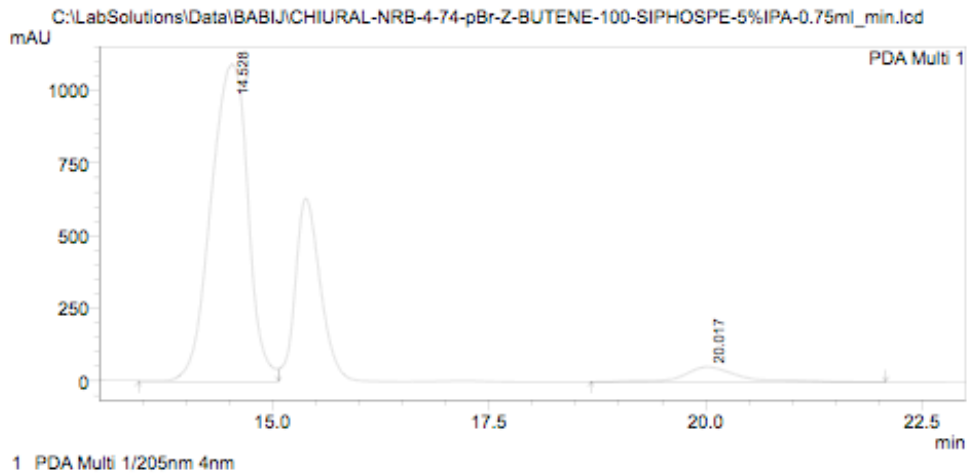

PeakTable

| Peak# | Ret. Time | Area     | Height  | Area %  |
|-------|-----------|----------|---------|---------|
| 1     | 14.528    | 32443013 | 1090281 | 94.464  |
| 2     | 20.017    | 1901139  | 49794   | 5.536   |
| Total |           | 34344152 | 1140076 | 100.000 |

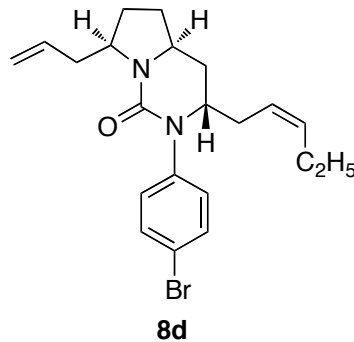

Sample Name:  
 Data Collected on:  
 Yb-vnms700  
 Archive directory:  
 Sample directory:  
 FidFile: NRB-4-102-X-1R  
 Pulse Sequence: PROTON (s2pul)  
 Solvent: cdcl3  
 Data collected on: Oct 19 2012

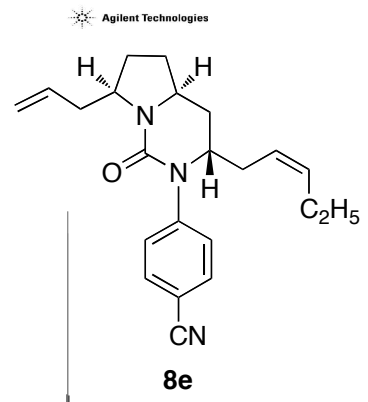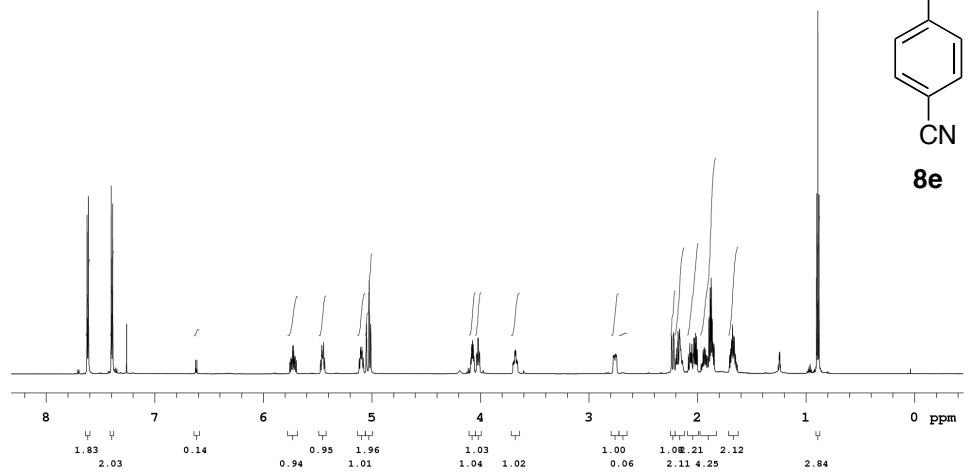

Sample Name:  
 Data Collected on:  
 Yb-vnms700  
 Archive directory:  
 Sample directory:  
 FidFile: NRB-4-102-13C  
 Pulse Sequence: CARBON (s2pul)  
 Solvent: cdcl3  
 Data collected on: Oct 18 2012

Agilent Technologies

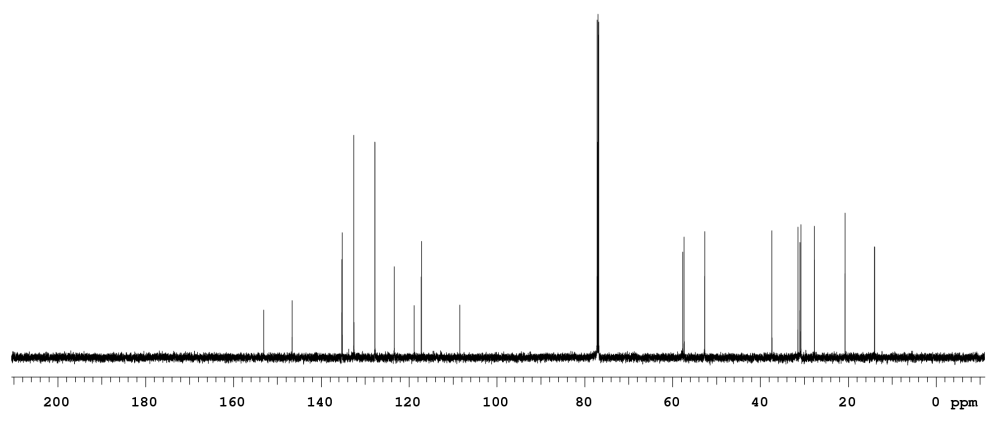

## ==== Shimadzu LCsolution Analysis Report ====

C:\LabSolutions\Data\BABI\RACEMIC-NRB-4-102-pCN-Z-BUTENE-100-PCY3-5%IPA-0.75ml\_min.lcd  
 Acquired by : Admin  
 Sample Name : RACEMIC-NRB-4-102-pCN-Z-BUTENE-100-PCY3-5%IPA-0.75ml\_min  
 Sample ID : <SAMPLE>  
 Tray# : 1  
 Vial # : 1  
 Injection Volume : 1 uL  
 Data File Name : RACEMIC-NRB-4-102-pCN-Z-BUTENE-100-PCY3-5%IPA-0.75ml\_min.lcd  
 Method File Name : Cyclic Urea Method.lcm  
 Batch File Name :  
 Report File Name : Default.lcr  
 Data Acquired : 10/17/2012 4:27:14 PM  
 Data Processed : 10/17/2012 5:22:38 PM

### <Chromatogram>

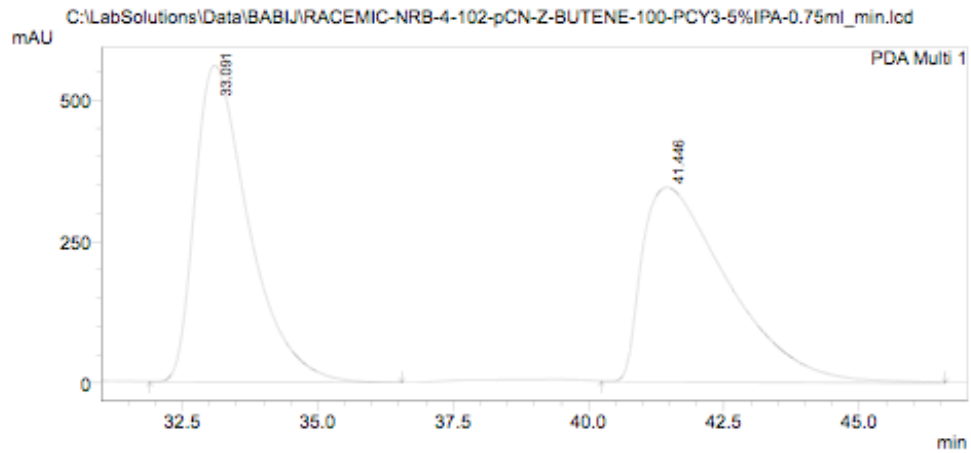

PeakTable

| Peak# | Ret. Time | Area     | Height | Area %  |
|-------|-----------|----------|--------|---------|
| 1     | 33.091    | 38677775 | 559423 | 50.478  |
| 2     | 41.446    | 37945343 | 343252 | 49.522  |
| Total |           | 76623118 | 902676 | 100.000 |

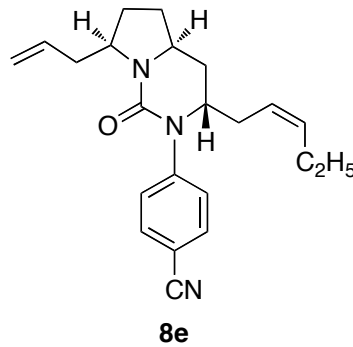

## ==== Shimadzu LCsolution Analysis Report ====

C:\LabSolutions\Data\BABI\CHIRAL-NRB-4-102-2-pCN-Z-BUTENE-100-NaOtBu-SSIPHOSPE-5%IPA-0.75ml\_min.lcd  
 Acquired by : Admin  
 Sample Name : CHIRAL-NRB-4-102-2-pCN-Z-BUTENE-100-NaOtBu-SSIPHOSPE-5%IPA-0.75  
 Sample ID : <SAMPLE>  
 Tray# : 1  
 Vial # : 1  
 Injection Volume : 1 uL  
 Data File Name : CHIRAL-NRB-4-102-2-pCN-Z-BUTENE-100-NaOtBu-SSIPHOSPE-5%IPA-0.75ml\_min.lcd  
 Method File Name : Cyclic Urea Method.lcm  
 Batch File Name :  
 Report File Name : Default.lcr  
 Data Acquired : 10/23/2012 6:10:26 PM  
 Data Processed : 10/23/2012 7:08:32 PM

### <Chromatogram>

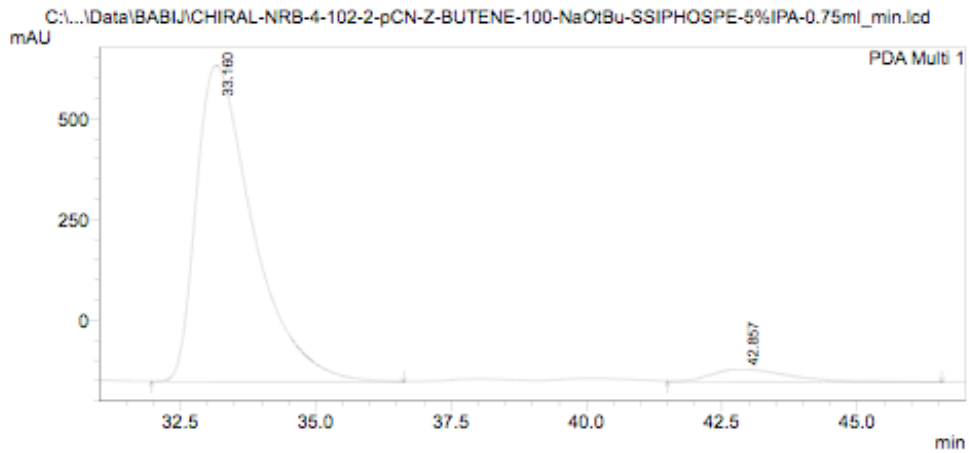

PeakTable

| Peak# | Ret. Time | Area     | Height | Area %  |
|-------|-----------|----------|--------|---------|
| 1     | 33.160    | 57259672 | 784638 | 94.609  |
| 2     | 42.857    | 3262654  | 31536  | 5.391   |
| Total |           | 60522326 | 816174 | 100.000 |

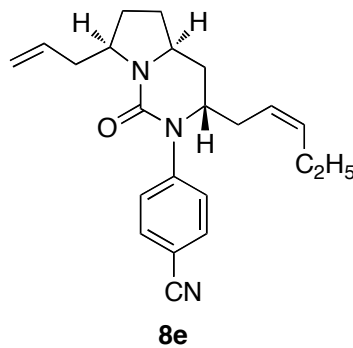

Sample Name:  
Data Collected on:  
Yb-vnmrs700  
Archive directory:  
Sample directory:  
FidFile: NRB-4-106-1H  
Pulse Sequence: PROTON (s2pul)  
Solvent: cdcl3  
Data collected on: Oct 31 2012

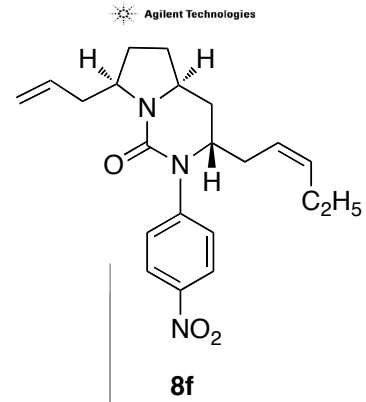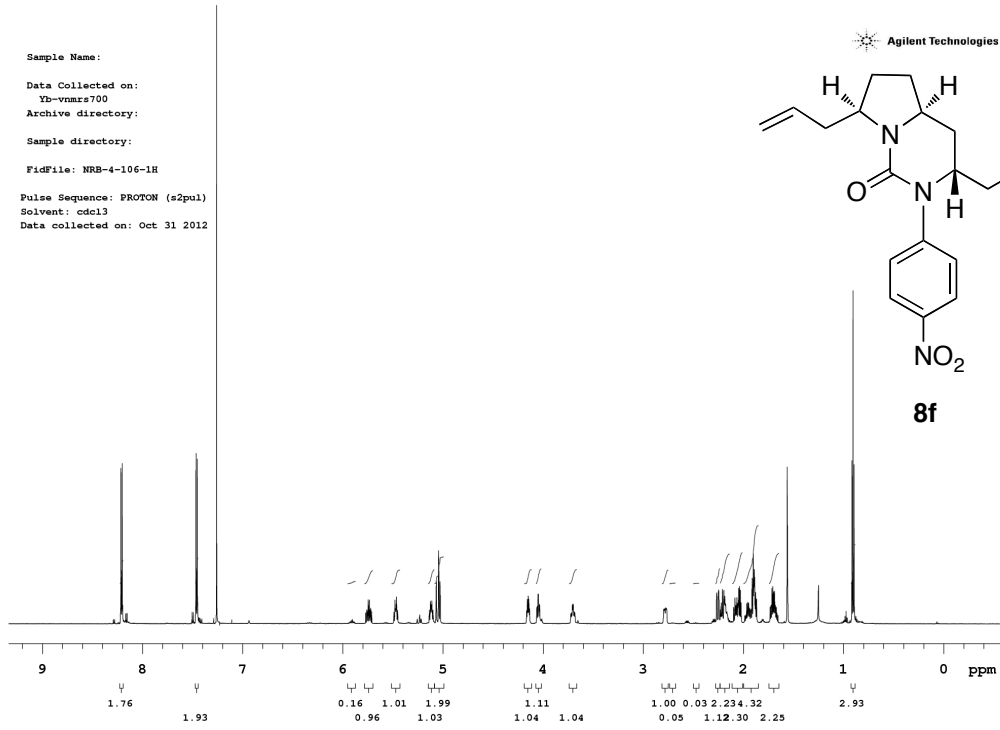

Sample Name:  
Data Collected on:  
Yb-vnmrs700  
Archive directory:  
Sample directory:  
FidFile: NRB-4-106-13C  
Pulse Sequence: CARBON (s2pul)  
Solvent: cdcl3  
Data collected on: Oct 30 2012

Agilent Technologies

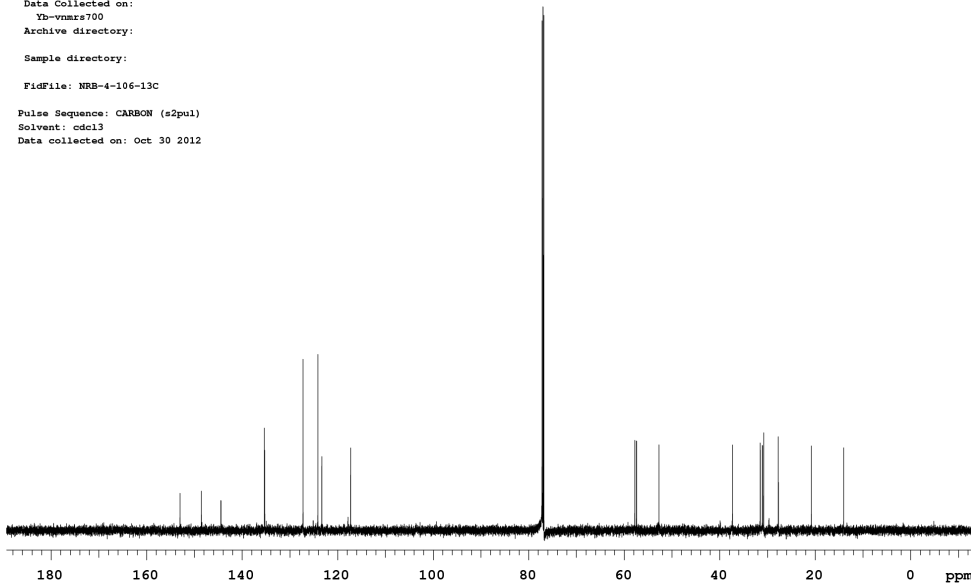

## ==== Shimadzu LCsolution Analysis Report ====

C:\LabSolutions\Data\BABI\IRACEMIC-NRB-4-106-2-pNO2-Z-BUTENE-120-SSIPHOSPE-5%IPA-1.5ml\_min.lcd  
 Acquired by : Admin  
 Sample Name : CHIRAL-NRB-4-106-2-pNO2-Z-BUTENE-120-SSIPHOSPE-5%IPA-1.5ml  
 Sample ID : <SAMPLE>  
 Tray# : 1  
 Vial # : 1  
 Injection Volume : 1 uL  
 Data File Name : RACEMIC-NRB-4-106-2-pNO2-Z-BUTENE-120-SSIPHOSPE-5%IPA-1.5ml\_min.lcd  
 Method File Name : Cyclic Urea Method.lcm  
 Batch File Name :  
 Report File Name : Default.lcr  
 Data Acquired : 10/30/2012 4:06:25 PM  
 Data Processed : 10/30/2012 4:40:18 PM

### <Chromatogram>

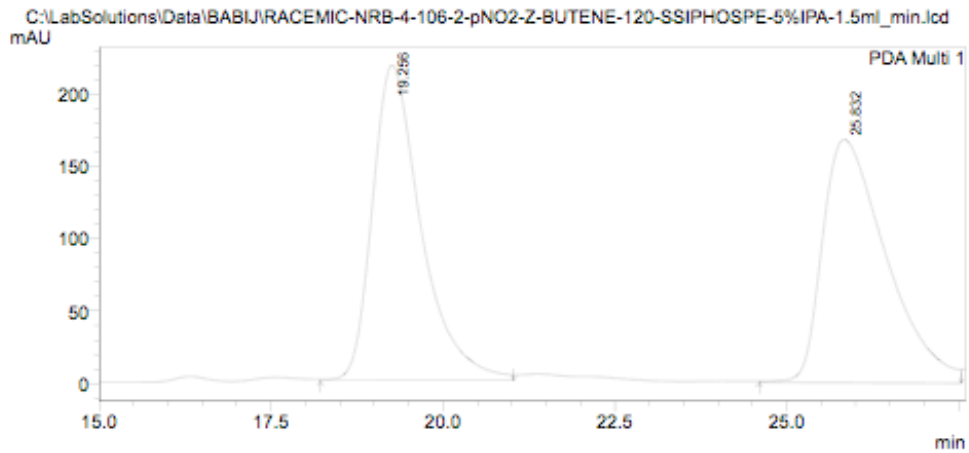

PeakTable

| PDA Ch1 310nm 4nm |           |          |        |         |
|-------------------|-----------|----------|--------|---------|
| Peak#             | Ret. Time | Area     | Height | Area %  |
| 1                 | 19.256    | 10775717 | 217860 | 49.820  |
| 2                 | 25.832    | 10853467 | 168010 | 50.180  |
| Total             |           | 21629184 | 385871 | 100.000 |

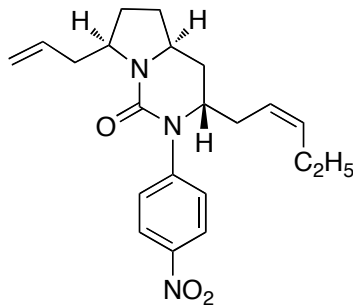

8f



## ==== Shimadzu LCsolution Analysis Report ====

C:\LabSolutions\Data\BABI\CHIRAL-NRB-4-106-pNO2-Z-BUTENE-120-NaOtBu-SSIPHOSPE-5%IPA-1.5ml\_min.lcd  
 Acquired by : Admin  
 Sample Name : CHIRAL-NRB-4-106-pNO2-Z-BUTENE-120-NaOtBu-SSIPHOSPE-5%IPA-1.5ml  
 Sample ID : <SAMPLE>  
 Tray# : 1  
 Vial # : 1  
 Injection Volume : 1 uL  
 Data File Name : CHIRAL-NRB-4-106-pNO2-Z-BUTENE-120-NaOtBu-SSIPHOSPE-5%IPA-1.5ml\_min.lcd  
 Method File Name : Cyclic Urea Method.lcm  
 Batch File Name :  
 Report File Name : Default.lcr  
 Data Acquired : 10/30/2012 2:49:31 PM  
 Data Processed : 10/30/2012 3:23:55 PM

### <Chromatogram>

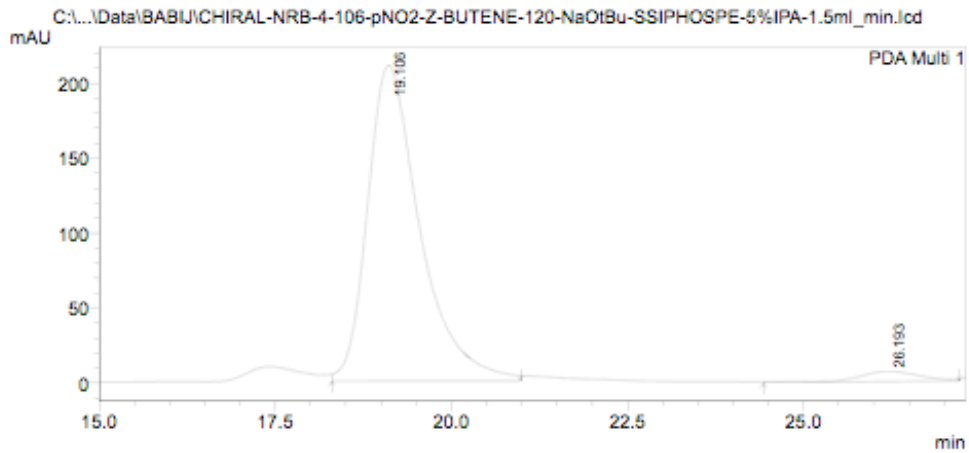

PeakTable

PDA Ch1 310nm 4nm

| Peak# | Ret. Time | Area     | Height | Area %  |
|-------|-----------|----------|--------|---------|
| 1     | 19.106    | 10898189 | 210578 | 96.308  |
| 2     | 26.193    | 417817   | 6715   | 3.692   |
| Total |           | 11316006 | 217293 | 100.000 |

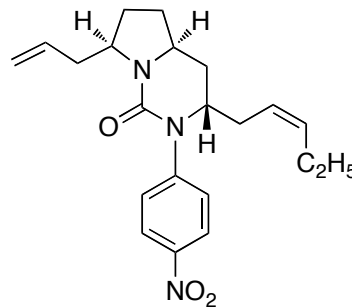

**8f**

Sample Name:  
Data Collected on:  
Sn.Chem.LSA.UMich.edu-inova500  
Archive directory:  
Sample directory:  
FidFile: NRB-4-140-X-1H-Ehexene  
Pulse Sequence: PROTON (s2pul)  
Solvent: cdcl3  
Data collected on: Jan 24 2013

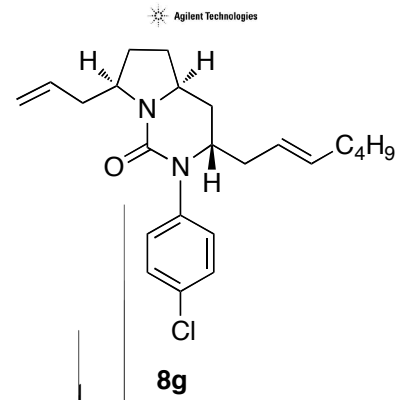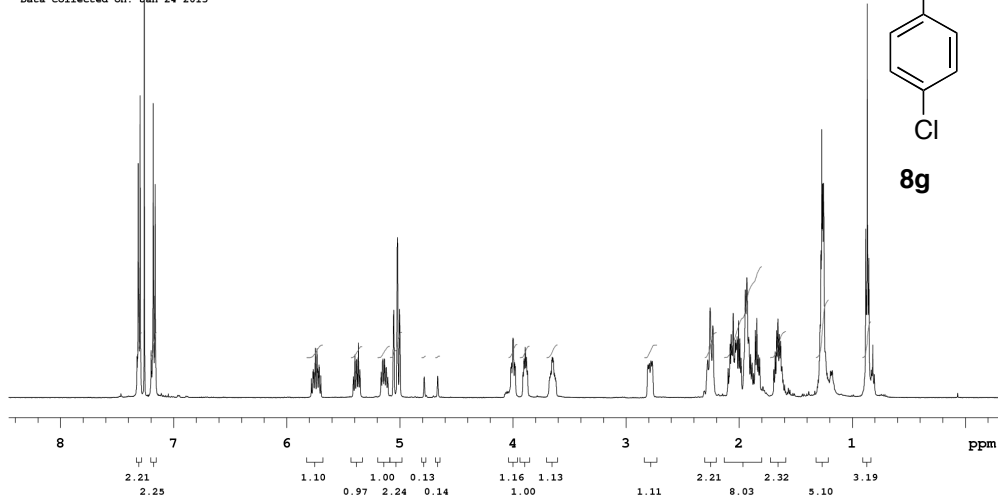

STANDARD PROTON PARAMETERS

Sample Name:  
Data Collected on:  
Te-vnmrs500  
Archive directory:  
Sample directory:  
FidFile: NRB-4-140-X-13C  
Pulse Sequence: CARBON (s2pul)  
Solvent: cdcl3  
Data collected on: Jan 6 2013

Agilent Technologies

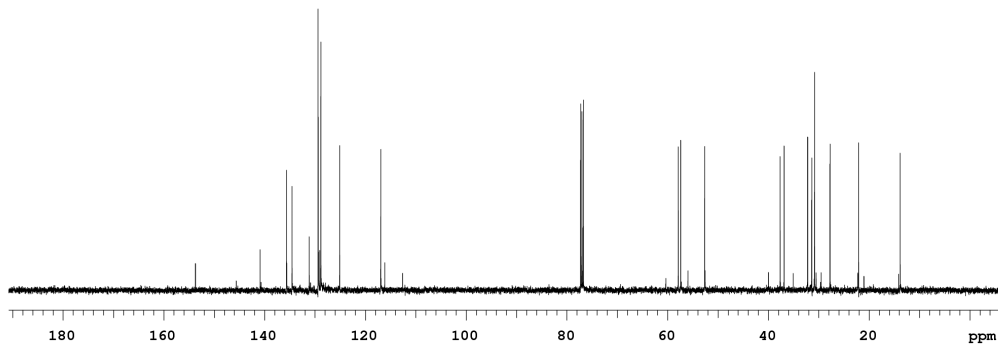

## ==== Shimadzu LCsolution Analysis Report ====

C:\LabSolutions\Data\BABI\IRACEMIC-NRB-4-140-pCl-Ehexene-100-NaOtBu-PCy3-1.5%IPA-1.5ml\_min.lcd  
 Acquired by : Admin  
 Sample Name : RACEMIC-NRB-4-140-pCl-Ehexene-100-NaOtBu-PCy3-1.5%IPA-1.5ml\_min  
 Sample ID : <SAMPLE>  
 Tray# : 1  
 Vial # : 1  
 Injection Volume : 1 uL  
 Data File Name : RACEMIC-NRB-4-140-pCl-Ehexene-100-NaOtBu-PCy3-1.5%IPA-1.5ml\_min.lcd  
 Method File Name : Cyclic Urea Method.lcm  
 Batch File Name :  
 Report File Name : Default.lcr  
 Data Acquired : 1/4/2013 4:14:52 PM  
 Data Processed : 1/4/2013 4:58:59 PM

### <Chromatogram>

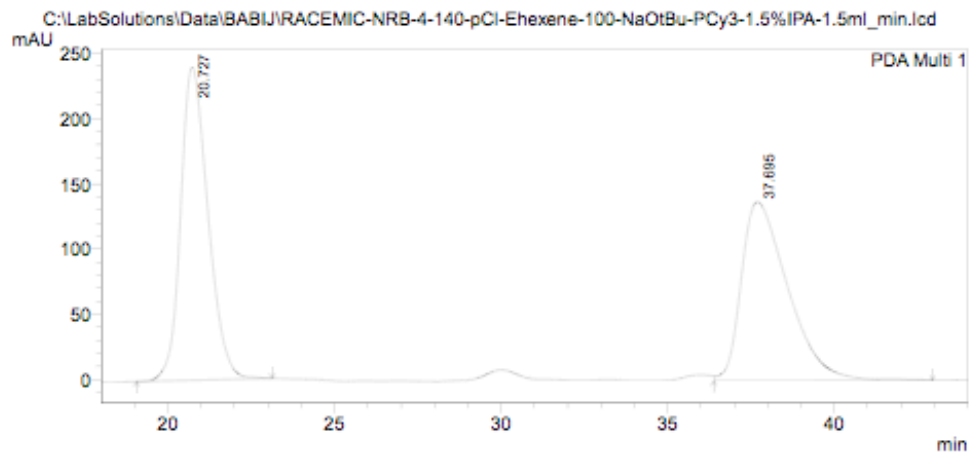

| PeakTable |           |          |        |         |
|-----------|-----------|----------|--------|---------|
| Peak#     | Ret. Time | Area     | Height | Area %  |
| 1         | 20.727    | 13698615 | 239789 | 50.749  |
| 2         | 37.695    | 13294427 | 136862 | 49.251  |
| Total     |           | 26993042 | 376651 | 100.000 |

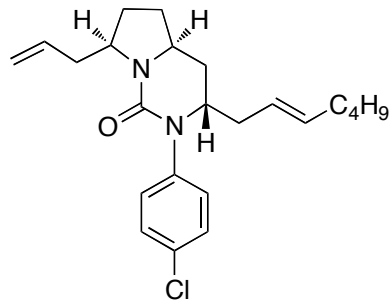

**8g**

## ==== Shimadzu LCsolution Analysis Report ====

C:\LabSolutions\Data\BABI\CHIRAL-NRB-4-140-X-2-pCl-Ehexene-100-NaOtBu-SSIPHOSPE-1.5%IPA-1.5ml\_min.lcd  
 Acquired by : Admin  
 Sample Name : CHIRAL-NRB-4-140-X-2-pCl-Ehexene-100-NaOtBu-SSIPHOSPE-1.5%IPA-1  
 Sample ID : <SAMPLE>  
 Tray# : 1  
 Vial # : 1  
 Injection Volume : 1 uL  
 Data File Name : CHIRAL-NRB-4-140-X-2-pCl-Ehexene-100-NaOtBu-SSIPHOSPE-1.5%IPA-1.5ml\_min.lcd  
 Method File Name : Cyclic Urea Method.lcm  
 Batch File Name :  
 Report File Name : Default.lcr  
 Data Acquired : 1/4/2013 4:59:58 PM  
 Data Processed : 1/4/2013 5:42:12 PM

### <Chromatogram>

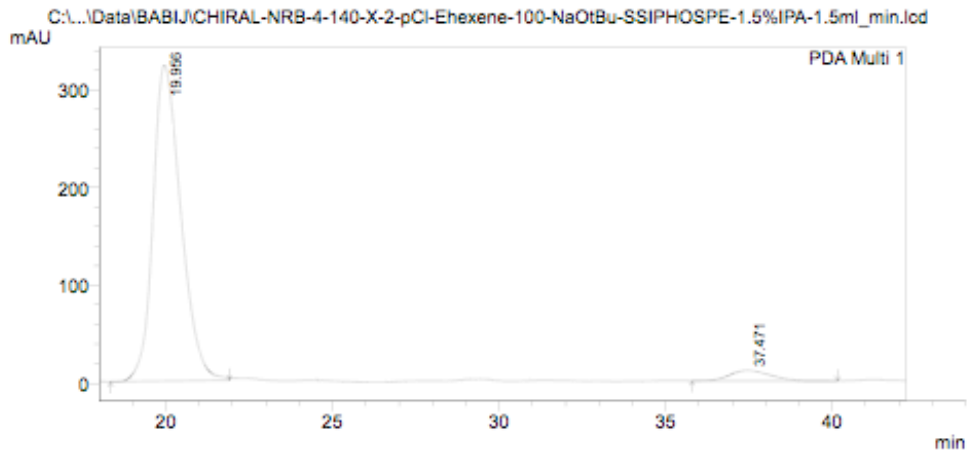

PeakTable

| Peak# | Ret. Time | Area     | Height | Area %  |
|-------|-----------|----------|--------|---------|
| 1     | 19.956    | 18822079 | 322958 | 95.508  |
| 2     | 37.471    | 885292   | 10642  | 4.492   |
| Total |           | 19707371 | 333600 | 100.000 |

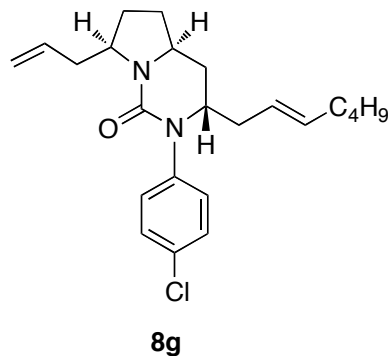

Sample Name:  
 Data Collected on:  
 Sn.Chem.LSA.UMich.edu-inova500  
 Archive directory:  
 Sample directory:  
 FidFile: NRB-4-141-X-Z-hexene-1H  
 Pulse Sequence: PROTON (s2pul)  
 Solvent: cdcl3  
 Data collected on: Jan 24 2013

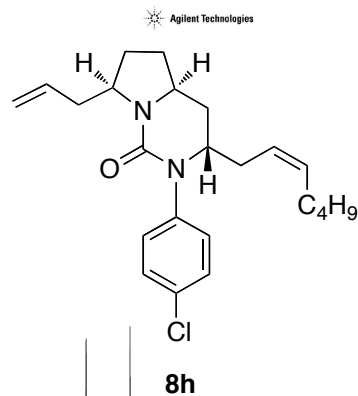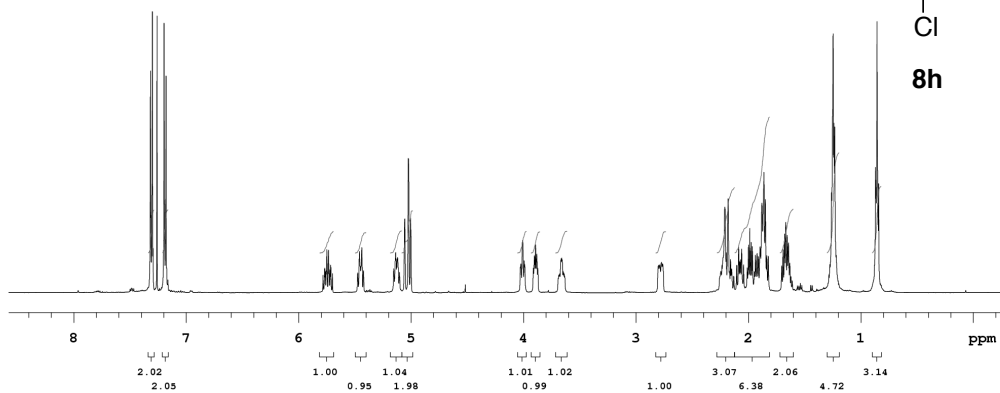

Sample Name:  
 Data Collected on:  
 Yb-vnmrs700  
 Archive directory:  
 Sample directory:  
 FidFile: NRB-4-141-X-13C  
 Pulse Sequence: CARBON (s2pul)  
 Solvent: cdcl3  
 Data collected on: Jan 8 2013



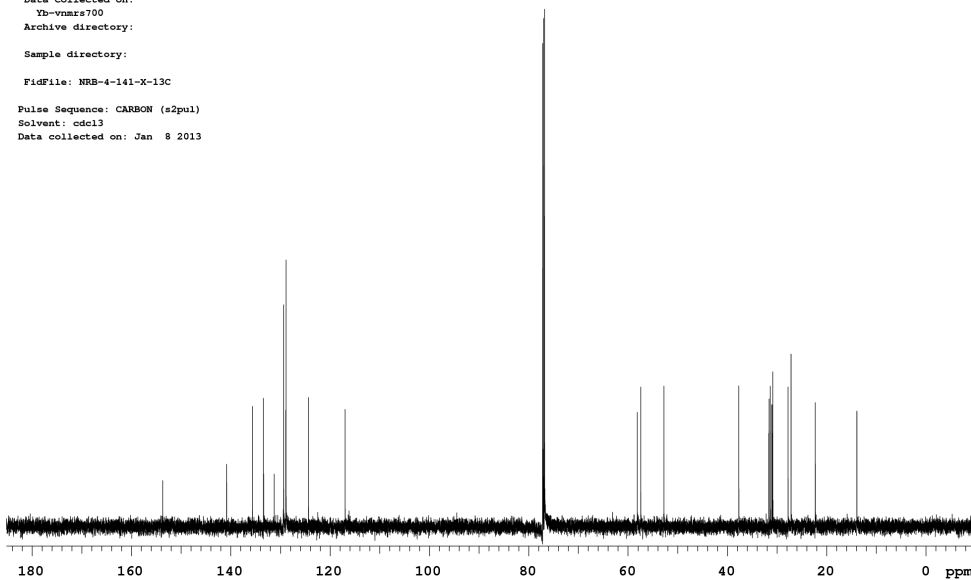

## ==== Shimadzu LCsolution Analysis Report ====

C:\LabSolutions\Data\BABI\RACEMIC-NRB-4-141-R-pCl-Zhexene-100-NaOtBu-PCy3-1.5%IPA-1.5ml\_min.lcd  
 Acquired by : Admin  
 Sample Name : RACEMIC-NRB-4-141-R-pCl-Zhexene-100-NaOtBu-PCy3-1.5%IPA-1.5ml\_m  
 Sample ID : <SAMPLE>  
 Tray# : 1  
 Vial # : 1  
 Injection Volume : 1 uL  
 Data File Name : RACEMIC-NRB-4-141-R-pCl-Zhexene-100-NaOtBu-PCy3-1.5%IPA-1.5ml\_min.lcd  
 Method File Name : Cyclic Urea Method.lcm  
 Batch File Name :  
 Report File Name : Default.lcr  
 Data Acquired : 1/8/2013 12:32:09 PM  
 Data Processed : 1/8/2013 1:30:14 PM

### <Chromatogram>

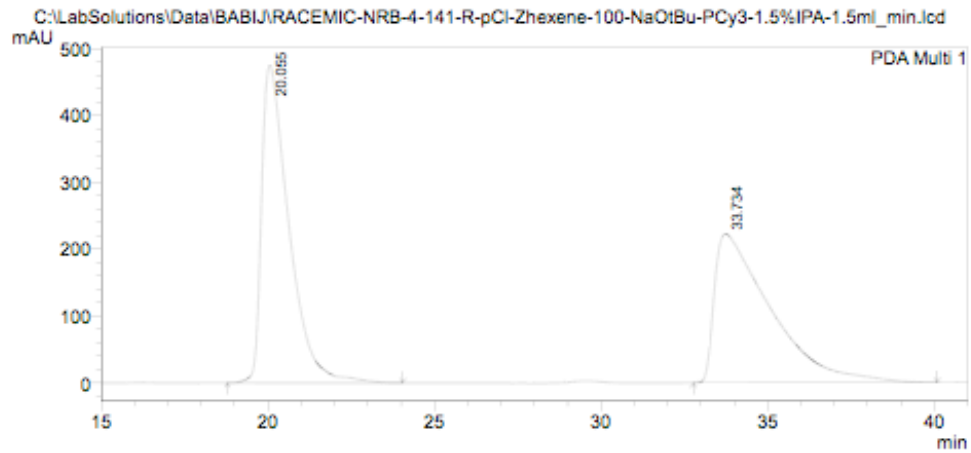

PeakTable

| Peak# | Ret. Time | Area     | Height | Area %  |
|-------|-----------|----------|--------|---------|
| 1     | 20.055    | 27108175 | 474557 | 50.964  |
| 2     | 33.734    | 26082514 | 222410 | 49.036  |
| Total |           | 53190689 | 696967 | 100.000 |

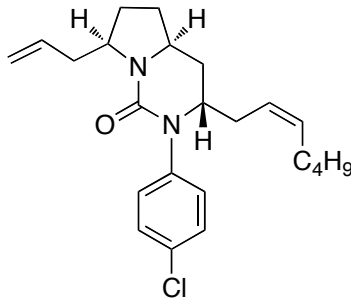

## ==== Shimadzu LCsolution Analysis Report ====

C:\LabSolutions\Data\BABI\CHIRAL-NRB-4-141-X-pCl-Zhexene-100-NaOtBu-SSIPHOSPE-1.5%IPA-1.5ml\_min.lcd  
 Acquired by : Admin  
 Sample Name : CHIRAL-NRB-4-141-X-pCl-Zhexene-100-NaOtBu-SSIPHOSPE-1.5%IPA-1.5  
 Sample ID : <SAMPLE>  
 Tray# : 1  
 Vial # : 1  
 Injection Volume : 1 uL  
 Data File Name : CHIRAL-NRB-4-141-X-pCl-Zhexene-100-NaOtBu-SSIPHOSPE-1.5%IPA-1.5ml\_min.lcd  
 Method File Name : Cyclic Urea Method.lcm  
 Batch File Name :  
 Report File Name : Default.lcr  
 Data Acquired : 1/7/2013 5:02:46 PM  
 Data Processed : 1/7/2013 5:47:55 PM

### <Chromatogram>

C:\LabSolutions\Data\BABI\CHIRAL-NRB-4-141-X-pCl-Zhexene-100-NaOtBu-SSIPHOSPE-1.5%IPA-1.5ml\_min.lcd  
 mAU

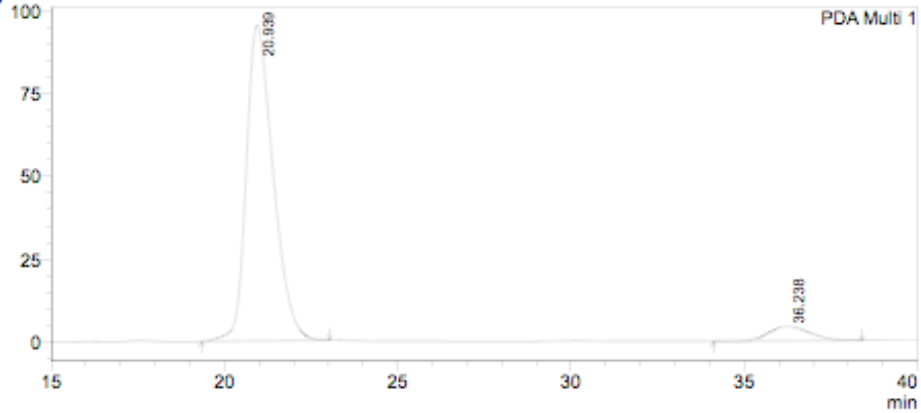

1 PDA Multi 1/254nm 4nm

PeakTable

| Peak# | Ret. Time | Area    | Height | Area %  |
|-------|-----------|---------|--------|---------|
| 1     | 20.939    | 5164727 | 95174  | 93.561  |
| 2     | 36.238    | 355461  | 4348   | 6.439   |
| Total |           | 5520188 | 99522  | 100.000 |

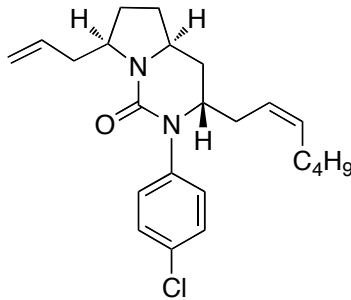

**8h**

Sample Name:  
Data Collected on:  
Yb-vnmrs700  
Archive directory:  
Sample directory:  
FidFile: NRB-4-134-X-1H  
Pulse Sequence: PROTON (s2pul)  
Solvent: cdcl3  
Data collected on: Dec 19 2012

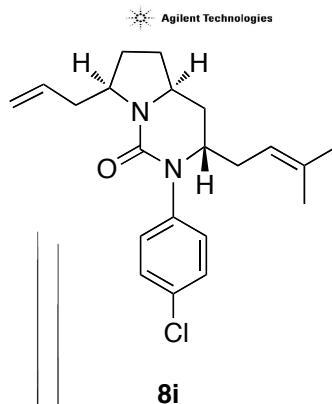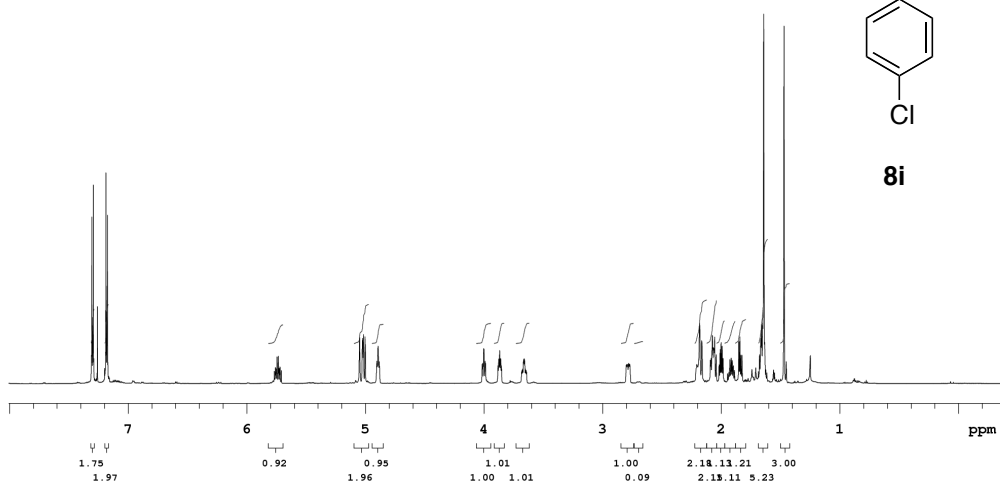

Sample Name:  
Data Collected on:  
Yb-vnmrs700  
Archive directory:  
Sample directory:  
FidFile: NRB-4-134-X-13C  
Pulse Sequence: CARBON (s2pul)  
Solvent: cdcl3  
Data collected on: Dec 19 2012

Agilent Technologies

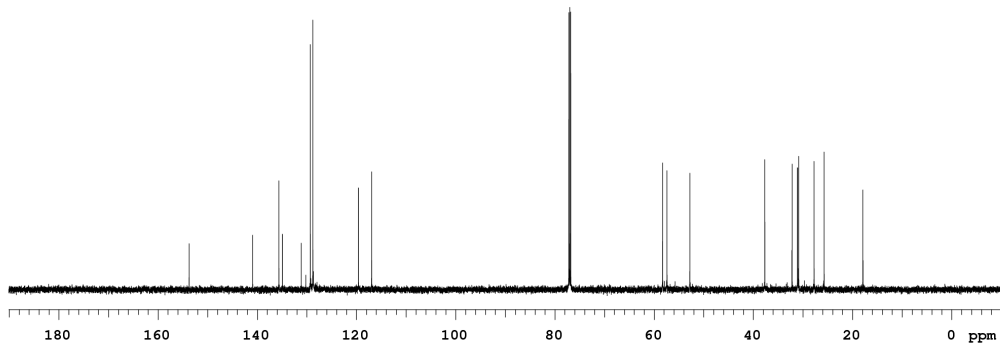



## ==== Shimadzu LCsolution Analysis Report ====

C:\...\Data\BABI\CHIRAL-NRB-4-123-pCl-1Br2MePropene-100-NaOtBu-SSIPHOSPE-5%IPA-0.75ml\_min.lcd  
 Acquired by : Admin  
 Sample Name : CHIRAL-NRB-4-123-pCl-1Br2MePropene-100-NaOtBu-SSIPHOSPE-5%IPA-0  
 Sample ID : <SAMPLE>  
 Tray# : 1  
 Vial # : 1  
 Injection Volume : 1 uL  
 Data File Name : CHIRAL-NRB-4-123-pCl-1Br2MePropene-100-NaOtBu-SSIPHOSPE-5%IPA-0.75ml\_min.lcd  
 Method File Name : Cyclic Urea Method.lcm  
 Batch File Name :  
 Report File Name : Default.lcr  
 Data Acquired : 12/11/2012 6:02:30 PM  
 Data Processed : 12/11/2012 6:43:19 PM

### <Chromatogram>

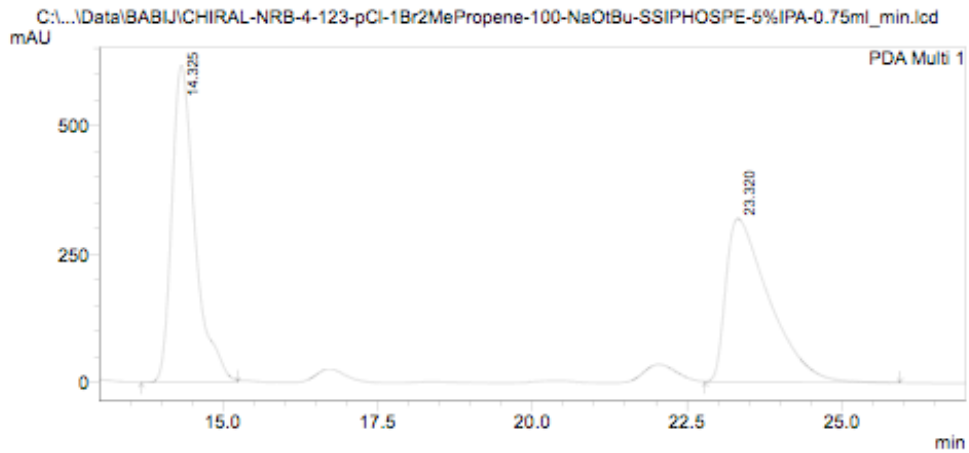

| PeakTable |           |          |        |         |
|-----------|-----------|----------|--------|---------|
| Peak#     | Ret. Time | Area     | Height | Area %  |
| 1         | 14.325    | 16086664 | 615989 | 50.923  |
| 2         | 23.320    | 15503816 | 317951 | 49.077  |
| Total     |           | 31590479 | 933941 | 100.000 |

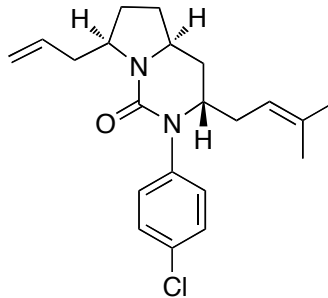

## ==== Shimadzu LCsolution Analysis Report ====

C:\...\Data\BABI\CHIRAL-NRB-4-134-X-pCl-1Br2MePropene-100-NaOtBu-SSIPHOSPE-5%IPA-0.75ml\_min.lcd  
 Acquired by : Admin  
 Sample Name : CHIRAL-NRB-4-134-X-pCl-1Br2MePropene-100-NaOtBu-SSIPHOSPE-5%IPA  
 Sample ID : <SAMPLE>  
 Tray# : 1  
 Vial # : 1  
 Injection Volume : 1 uL  
 Data File Name : CHIRAL-NRB-4-134-X-pCl-1Br2MePropene-100-NaOtBu-SSIPHOSPE-5%IPA-0.75ml\_min.lcd  
 Method File Name : Cyclic Urea Method.lcm  
 Batch File Name :  
 Report File Name : Default.lcr  
 Data Acquired : 12/19/2012 3:20:33 PM  
 Data Processed : 12/19/2012 3:51:53 PM

### <Chromatogram>

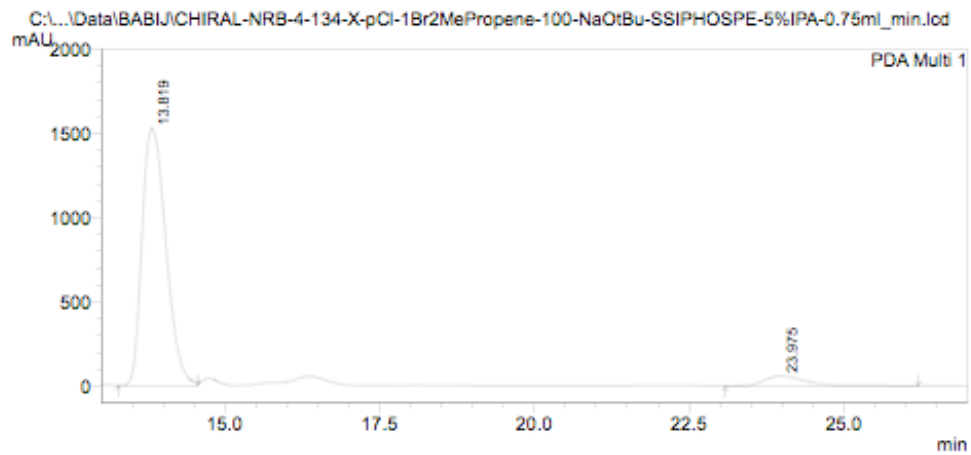

| PeakTable         |           |          |         |         |
|-------------------|-----------|----------|---------|---------|
| PDA Ch1 254nm 4nm |           |          |         |         |
| Peak#             | Ret. Time | Area     | Height  | Area %  |
| 1                 | 13.819    | 40943767 | 1527198 | 93.771  |
| 2                 | 23.975    | 2719612  | 58406   | 6.229   |
| Total             |           | 43663379 | 1585604 | 100.000 |

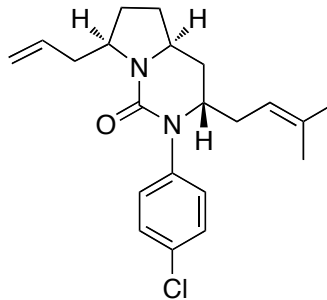

Sample Name:  
Data Collected on:  
Yb-vnmrs700  
Archive directory:  
Sample directory:  
FidFile: NRB-4-135-X-1H-2propene  
Pulse Sequence: PROTON (s2pul)  
Solvent: cdcl3  
Data collected on: Dec 21 2012

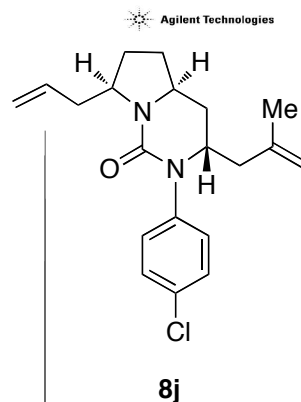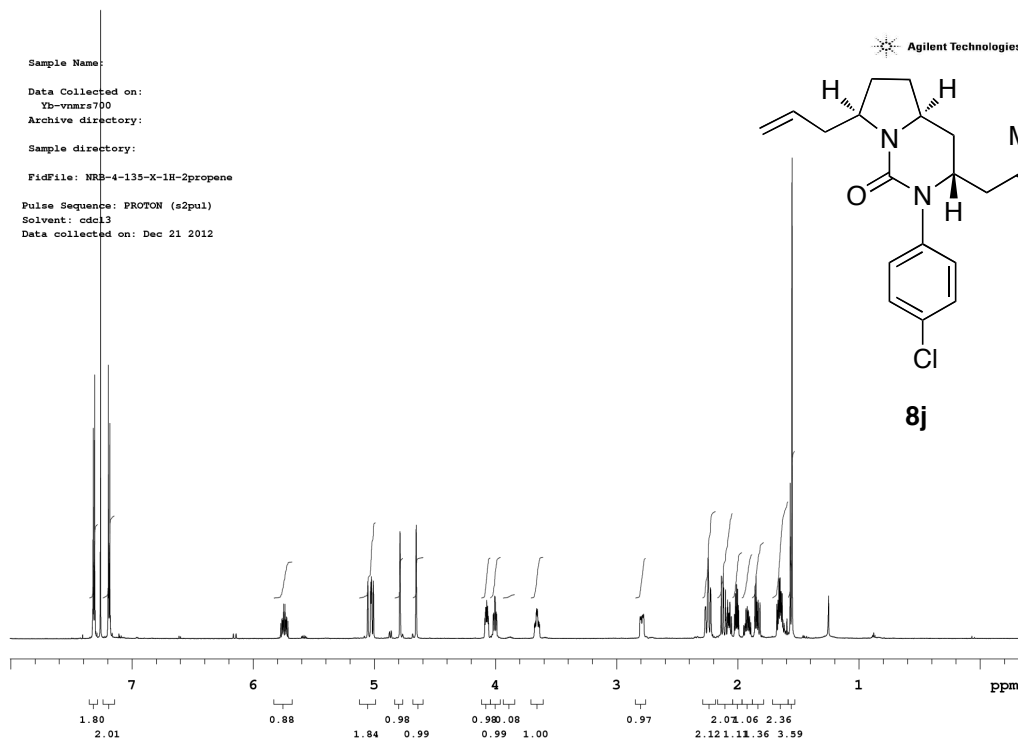

STANDARD PROTON PARAMETERS

Sample Name:  
Data Collected on:  
Te-vnmrs500  
Archive directory:  
Sample directory:  
FidFile: NRB-4-135-X-13C-2propene  
Pulse Sequence: CARBON (s2pul)  
Solvent: cdcl3  
Data collected on: Dec 21 2012

Agilent Technologies

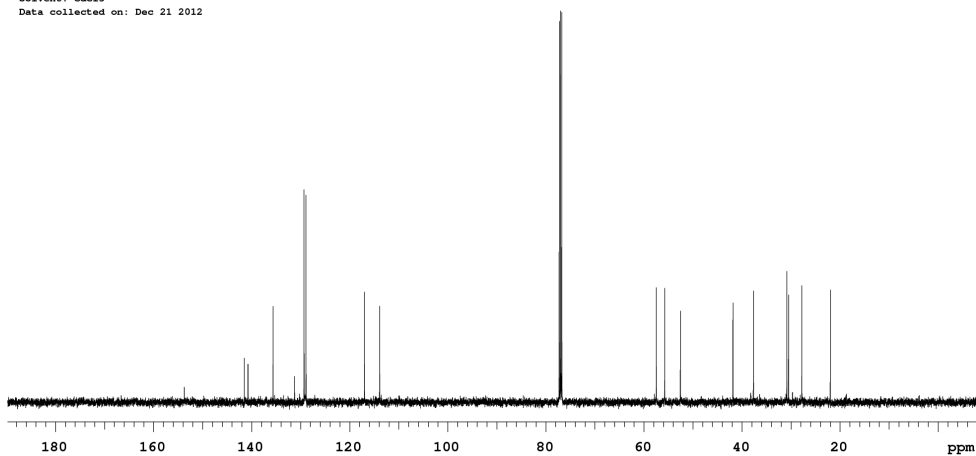

### ==== Shimadzu LCsolution Analysis Report ====

C:\LabSolutions\Data\BABI\RACEMIC-NRB-4-126-2-pCl-2Propene-100-PCY3-3%IPA-0.75ml\_min.lcd  
 Acquired by : Admin  
 Sample Name : RACEMIC-NRB-4-126-2-pCl-2Propene-100-PCY3-3%IPA-0.75ml\_min  
 Sample ID : <SAMPLE>  
 Tray# : 1  
 Vial # : 1  
 Injection Volume : 1 uL  
 Data File Name : RACEMIC-NRB-4-126-2-pCl-2Propene-100-PCY3-3%IPA-0.75ml\_min.lcd  
 Method File Name : Cyclic Urea Method.lcm  
 Batch File Name :  
 Report File Name : Default.lcr  
 Data Acquired : 12/20/2012 1:52:01 PM  
 Data Processed : 12/20/2012 2:31:47 PM

#### <Chromatogram>

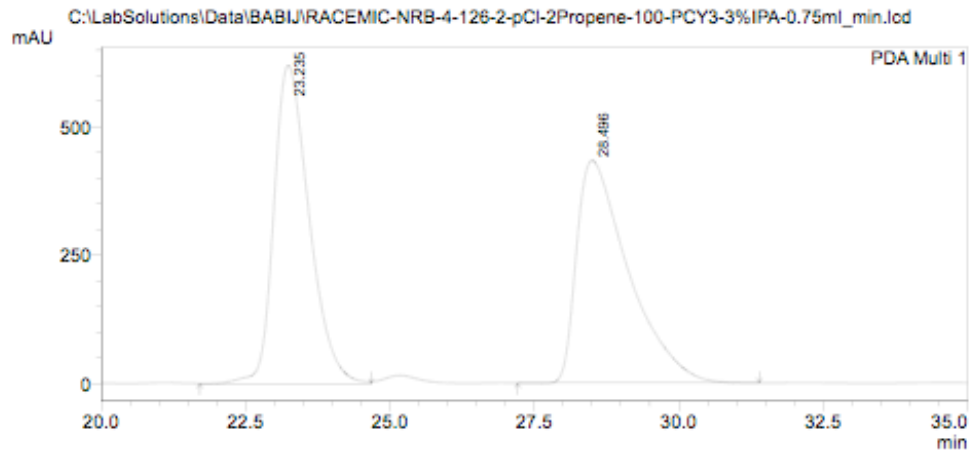

PeakTable

| Peak# | Ret. Time | Area     | Height  | Area %  |
|-------|-----------|----------|---------|---------|
| 1     | 23.235    | 26432880 | 621250  | 49.297  |
| 2     | 28.496    | 27186656 | 434267  | 50.703  |
| Total |           | 53619536 | 1055517 | 100.000 |

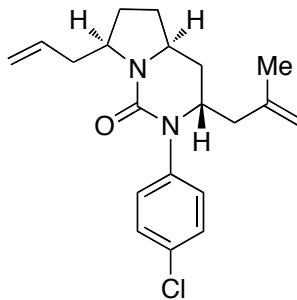

8j

## ==== Shimadzu LCsolution Analysis Report ====

C:\LabSolutions\Data\BABIJ\CHIRAL-NRB-4-135-2-pCl-2propene-100-NaOtBu-SSIPHOSPE-3%IPA-0.75ml\_min.lcd  
 Acquired by : Admin  
 Sample Name : CHIRAL-NRB-4-135-2-pCl-2prop-100-NaOtBu-SSIPHOSPE-3%IPA-0.75ml  
 Sample ID : <SAMPLE>  
 Tray# : 1  
 Vial # : 1  
 Injection Volume : 1 uL  
 Data File Name : CHIRAL-NRB-4-135-2-pCl-2propene-100-NaOtBu-SSIPHOSPE-3%IPA-0.75ml\_min.lcd  
 Method File Name : Cyclic Urea Method.lcm  
 Batch File Name :  
 Report File Name : Default.lcr  
 Data Acquired : 12/20/2012 5:22:09 PM  
 Data Processed : 12/20/2012 6:22:39 PM

### <Chromatogram>

C:\LabSolutions\Data\BABIJ\CHIRAL-NRB-4-135-2-pCl-2propene-100-NaOtBu-SSIPHOSPE-3%IPA-0.75ml\_min.lcd  
 mAU

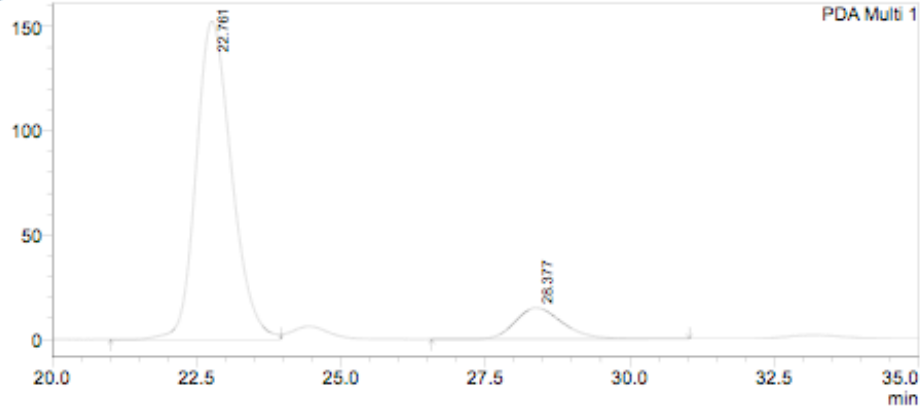

PeakTable

| PDA Ch1 254nm 4nm |           |         |        |         |
|-------------------|-----------|---------|--------|---------|
| Peak#             | Ret. Time | Area    | Height | Area %  |
| 1                 | 22.761    | 6535743 | 152637 | 88.459  |
| 2                 | 28.377    | 852687  | 14946  | 11.541  |
| Total             |           | 7388431 | 167583 | 100.000 |

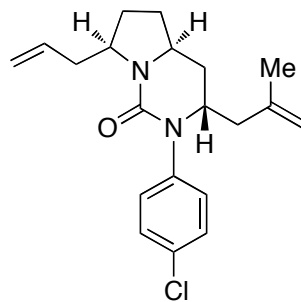

8j

Sample Name:  
Data Collected on:  
Yb-vnmrs700  
Archive directory:  
Sample directory:  
FidFile: NRB-4-105-X-A-1H-toly1  
Pulse Sequence: PROTON (s2pul)  
Solvent: cdcl3  
Data collected on: Oct 25 2012

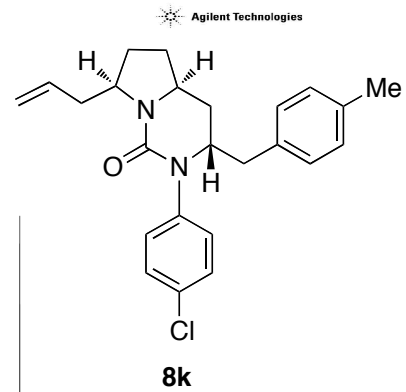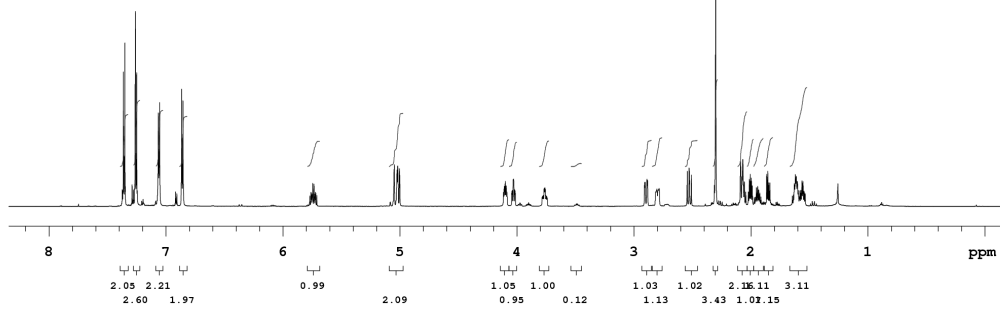

Sample Name:  
Data Collected on:  
Yb-vnmrs700  
Archive directory:  
Sample directory:  
FidFile: NRB-4-105-X-A-13C-toly1  
Pulse Sequence: CARBON (s2pul)  
Solvent: cdcl3  
Data collected on: Oct 25 2012

Agilent Technologies

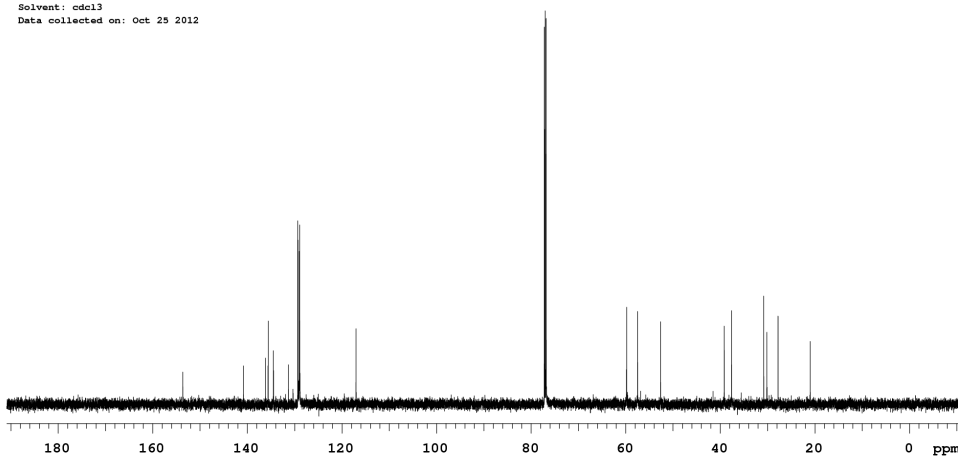

Sample Name:  
 Data Collected on:  
 Yb-vmars700  
 Archive directory:  
 Sample directory:  
 FidFile: NRB-4-120-COSY-4tol  
 Pulse Sequence: gCOSY  
 Solvent: cdcl3  
 Data collected on: Dec 10 2012  
 Operator: nbabij  
 Relax. delay 1.000 sec  
 Acq. time 0.150 sec  
 Width 11160.7 Hz  
 2D Width 11160.7 Hz  
 2 repetitions  
 128 increments  
 OBSERVE H1, 699.7567660 MHz  
 DATA PROCESSING  
 Sq. sine bell 0.075 sec  
 F1 DATA PROCESSING  
 Sq. sine bell 0.011 sec  
 FT size 4096 x 4096  
 Total time 5 min 40 sec

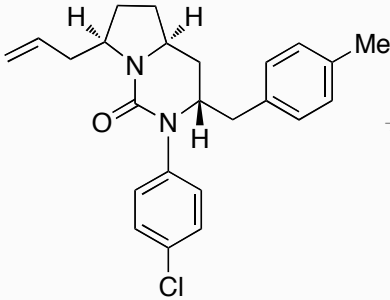

8k

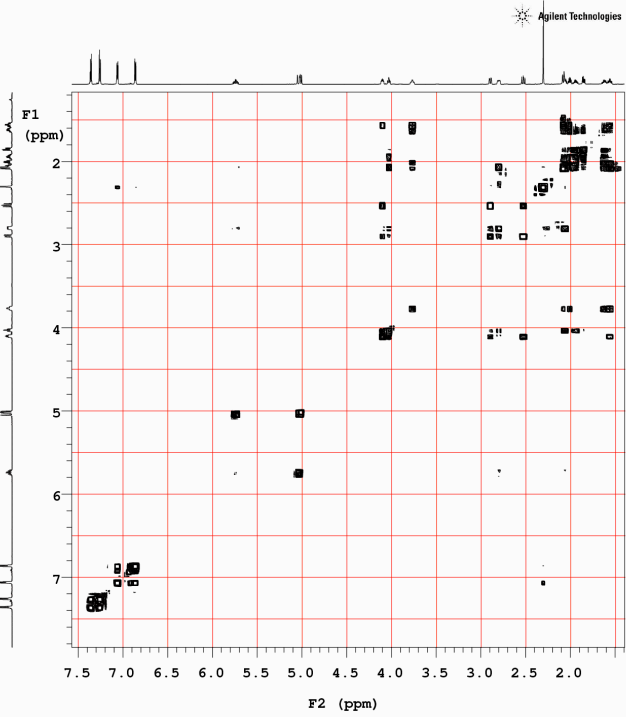

Sample Name:  
 Data Collected on:  
 Yb-vmars700  
 Archive directory:  
 Sample directory:  
 FidFile: NRB-4-120-NOESY-4tol  
 Pulse Sequence: NOESY  
 Solvent: cdcl3  
 Data collected on: Dec 10 2012  
 Operator: nbabij  
 Relax. delay 1.000 sec  
 Acq. time 0.150 sec  
 Width 5868.5 Hz  
 2D Width 5868.5 Hz  
 4 repetitions  
 2 x 128 increments  
 OBSERVE H1, 699.7567660 MHz  
 DATA PROCESSING  
 Gauss apodization 0.069 sec  
 F1 DATA PROCESSING  
 Gauss apodization 0.020 sec  
 FT size 2048 x 2048  
 Total time 24 min

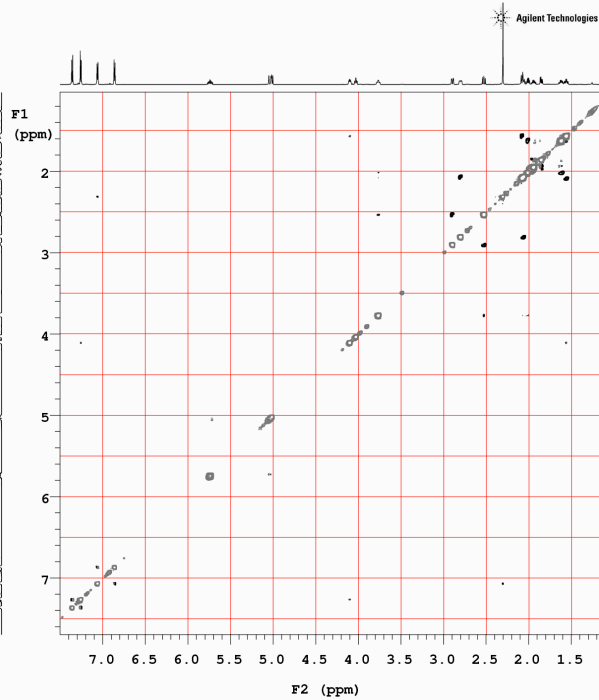

## ==== Shimadzu LCsolution Analysis Report ====

C:\LabSolutions\Data\BABI\IRACEMIC-NRB-4-55-pCl-TOLYL-100-PCY3-5%IPA-0.75ml\_min.lcd  
 Acquired by : Admin  
 Sample Name : RACEMIC-NRB-4-55-pCl-TOLYL-100-PCY3-5%IPA-0.75ml\_min  
 Sample ID : <SAMPLE>  
 Tray# : 1  
 Vial # : 1  
 Injection Volume : 1 uL  
 Data File Name : RACEMIC-NRB-4-55-pCl-TOLYL-100-PCY3-5%IPA-0.75ml\_min.lcd  
 Method File Name : Cyclic Urea Method.lcm  
 Batch File Name :  
 Report File Name : Default.lcr  
 Data Acquired : 8/8/2012 2:44:19 PM  
 Data Processed : 8/8/2012 3:10:15 PM

### <Chromatogram>

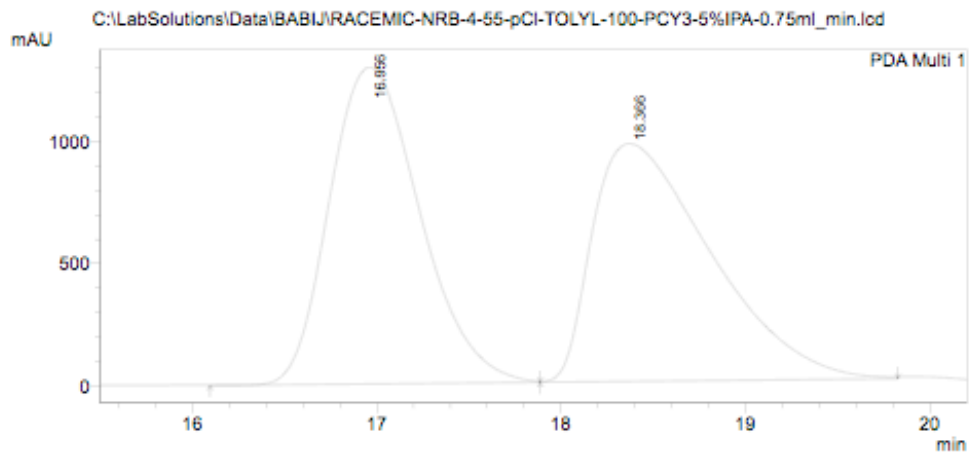

PeakTable

| Peak# | Ret. Time | Area     | Height  | Area %  |
|-------|-----------|----------|---------|---------|
| 1     | 16.956    | 44268953 | 1299090 | 50.371  |
| 2     | 18.366    | 43617224 | 974723  | 49.629  |
| Total |           | 87886176 | 2273813 | 100.000 |

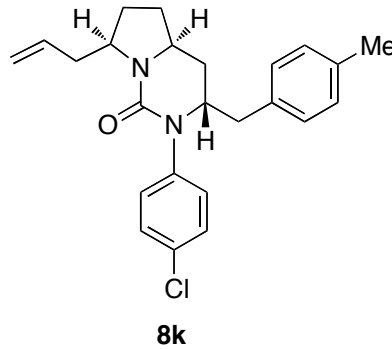



## ==== Shimadzu LCsolution Analysis Report ====

C:\LabSolutions\Data\BABU\CHIRAL-NRB-4-92-2-pCl-4-TOLYL-100-NAOtBU-SSIPHOSPE-5%IPA-0.75ml\_min.lcd  
 Acquired by : Admin  
 Sample Name : CHIRAL-NRB-4-92-2-pCl-TOLYL-100-NAOtBU-SSIPHOSPE-5%IPA-0.75ml\_m  
 Sample ID : <SAMPLE>  
 Tray# : 1  
 Vial # : 1  
 Injection Volume : 1 uL  
 Data File Name : CHIRAL-NRB-4-92-2-pCl-4-TOLYL-100-NAOtBU-SSIPHOSPE-5%IPA-0.75ml\_min.lcd  
 Method File Name : Cyclic Urea Method.lcm  
 Batch File Name :  
 Report File Name : Default.lcr  
 Data Acquired : 9/28/2012 4:49:24 PM  
 Data Processed : 9/28/2012 5:13:26 PM

### <Chromatogram>

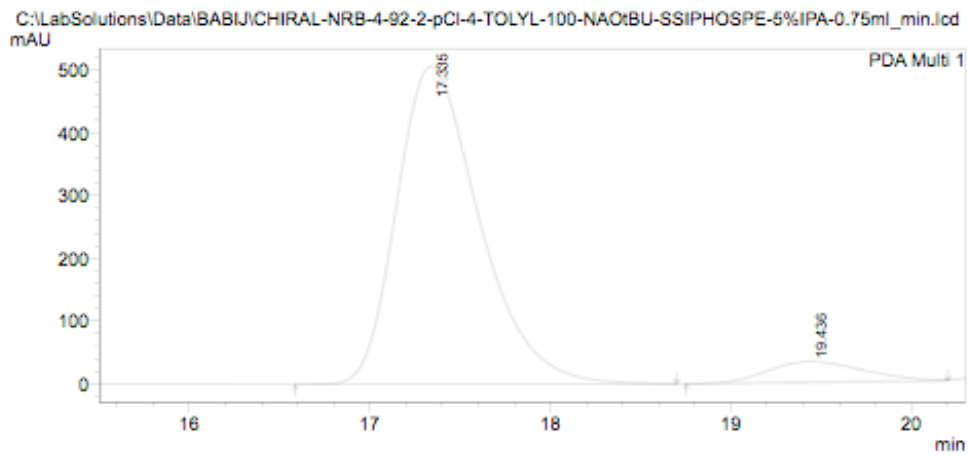

1 PDA Multi 1/254nm 4nm

PeakTable

| Peak# | Ret. Time | Area     | Height | Area %  |
|-------|-----------|----------|--------|---------|
| 1     | 17.335    | 16104566 | 506093 | 92.981  |
| 2     | 19.436    | 1215674  | 32944  | 7.019   |
| Total |           | 17320240 | 539037 | 100.000 |

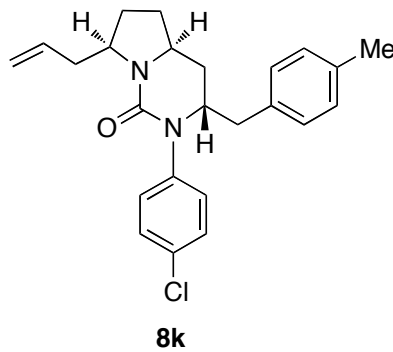

Sample Name:  
 Data Collected on:  
 Yb-vnmrs700  
 Archive directory:  
 Sample directory:  
 FidFile: NRB-4-105-X-B-1H-4-OMe  
 Pulse Sequence: PROTON (s2pul)  
 Solvent: cdcl3  
 Data collected on: Oct 25 2012

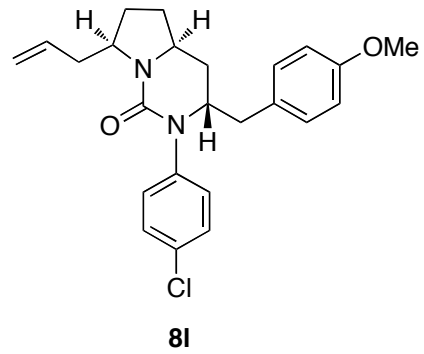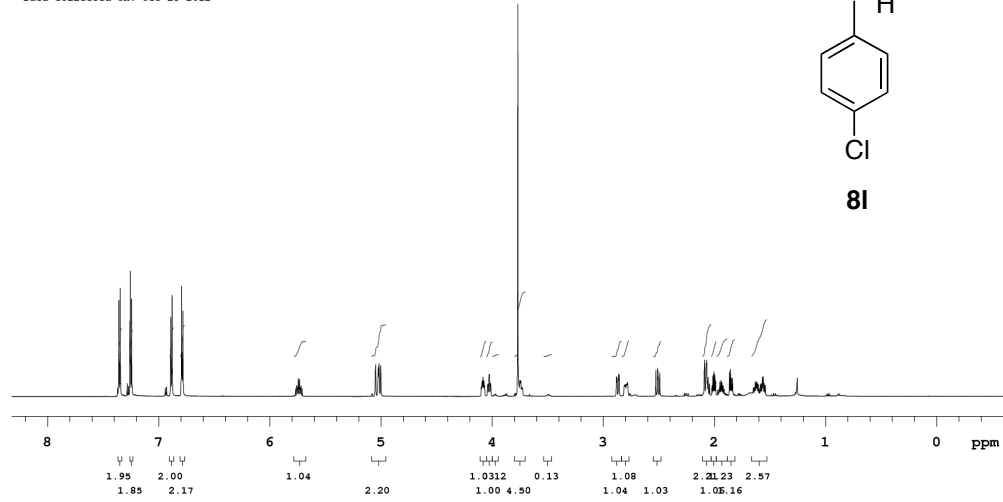

Sample Name:  
 Data Collected on:  
 Yb-vnmrs700  
 Archive directory:  
 Sample directory:  
 FidFile: CARBON  
 Pulse Sequence: CARBON (s2pul)  
 Solvent: cdcl3  
 Data collected on: Oct 25 2012

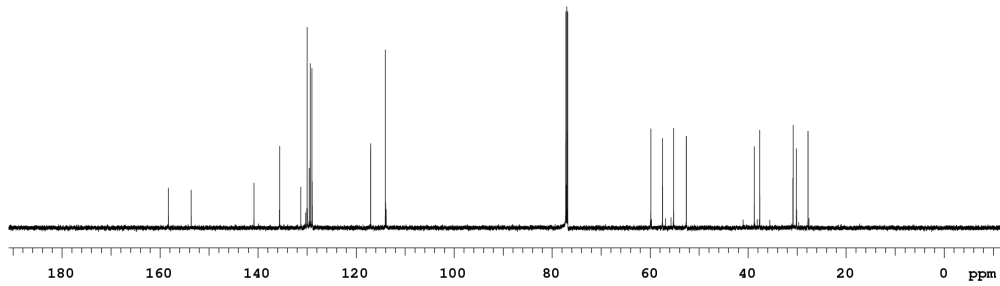

## ==== Shimadzu LCsolution Analysis Report ====

C:\LabSolutions\Data\BABI\IRACEMIC-NRB-4-86-pCl-OMe-100-PCY3-3%IPA-0.75ml\_min.lcd  
 Acquired by : Admin  
 Sample Name : RACEMIC-NRB-4-86-pCl-OMe-100-PCY3-3%IPA-0.75ml\_min  
 Sample ID : <SAMPLE>  
 Tray# : 1  
 Vial # : 1  
 Injection Volume : 1 uL  
 Data File Name : RACEMIC-NRB-4-86-pCl-OMe-100-PCY3-3%IPA-0.75ml\_min.lcd  
 Method File Name : Cyclic Urea Method.lcm  
 Batch File Name :  
 Report File Name : Default.lcr  
 Data Acquired : 11/29/2012 6:05:51 PM  
 Data Processed : 11/29/2012 7:24:45 PM

### <Chromatogram>

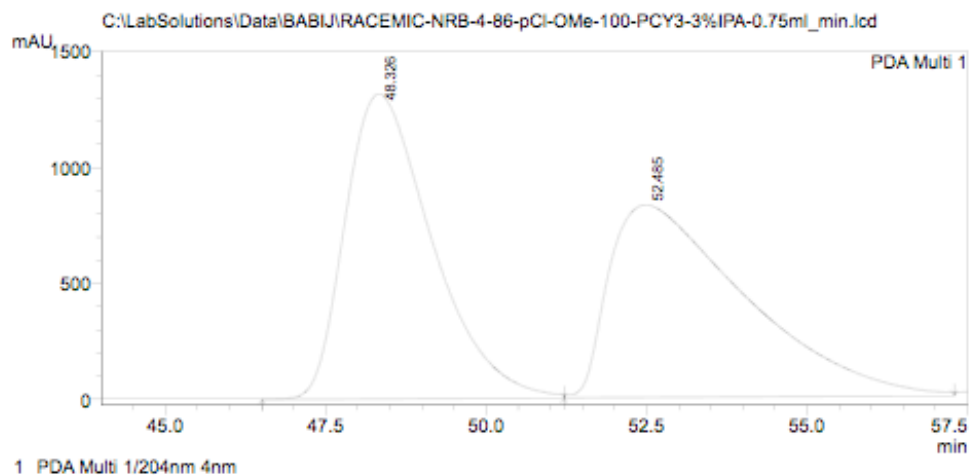

PeakTable

| Peak# | Ret. Time | Area      | Height  | Area %  |
|-------|-----------|-----------|---------|---------|
| 1     | 48.326    | 123683130 | 1316190 | 50.164  |
| 2     | 52.485    | 122874255 | 830445  | 49.836  |
| Total |           | 246557385 | 2146635 | 100.000 |

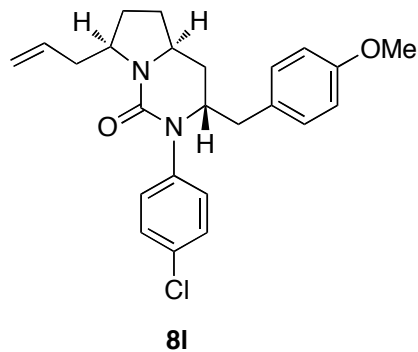

## ==== Shimadzu LCsolution Analysis Report ====

C:\LabSolutions\Data\BABI\CHIRAL-NRB-4-116-pCl-4-OMe-21-100-NaOtBu-SSIPHOSPE-3%IPA-0.75ml\_min.lcd  
 Acquired by : Admin  
 Sample Name : CHIRAL-NRB-4-116-pCl-4-OMe-21-100-NaOtBu-SSIPHOSPE-3%IPA-0.75ml  
 Sample ID : <SAMPLE>  
 Tray# : 1  
 Vial # : 1  
 Injection Volume : 1 uL  
 Data File Name : CHIRAL-NRB-4-116-pCl-4-OMe-21-100-NaOtBu-SSIPHOSPE-3%IPA-0.75ml\_min.lcd  
 Method File Name : Cyclic Urea Method.lcm  
 Batch File Name :  
 Report File Name : Default.lcr  
 Data Acquired : 11/29/2012 4:44:16 PM  
 Data Processed : 11/29/2012 6:04:21 PM

### <Chromatogram>

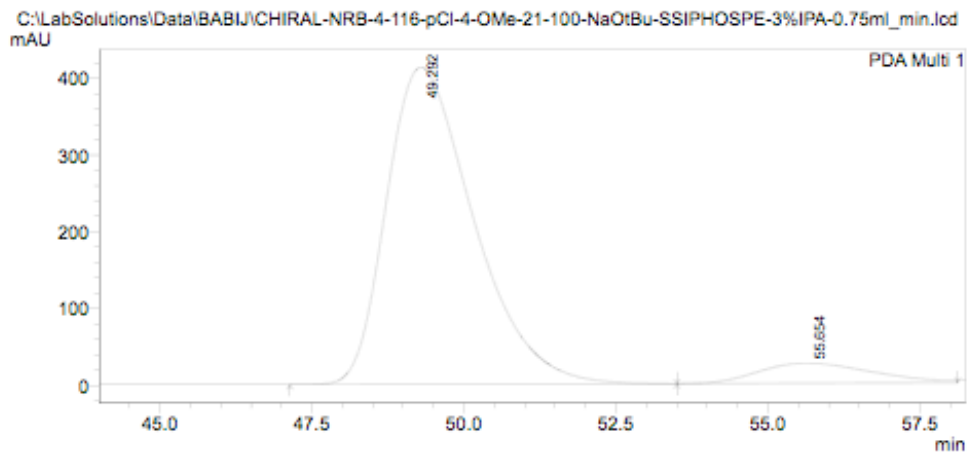

PeakTable

| Peak# | Ret. Time | Area     | Height | Area %  |
|-------|-----------|----------|--------|---------|
| 1     | 49.292    | 41066585 | 412959 | 92.385  |
| 2     | 55.654    | 3384865  | 26148  | 7.615   |
| Total |           | 44451450 | 439107 | 100.000 |



Sample Name:  
 Data Collected on:  
 Yb-vnmrs700  
 Archive directory:  
 Sample directory:  
 FidFile: NRB-4-105-E-X-1R-Ph  
 Pulse Sequence: PROTON (s2pul)  
 Solvent: cdcl3  
 Data collected on: Oct 25 2012

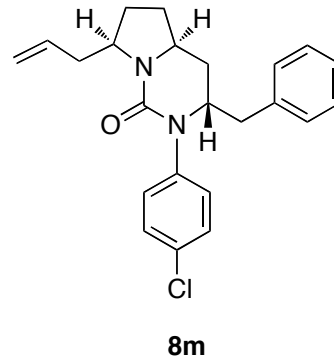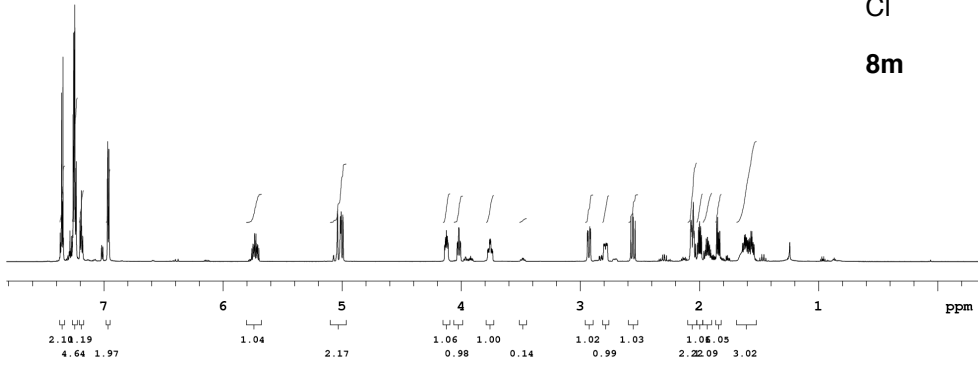

Sample Name:  
 Data Collected on:  
 Yb-vnmrs700  
 Archive directory:  
 Sample directory:  
 FidFile: NRB-4-105-E-X-13C-Ph  
 Pulse Sequence: CARBON (s2pul)  
 Solvent: cdcl3  
 Data collected on: Oct 25 2012

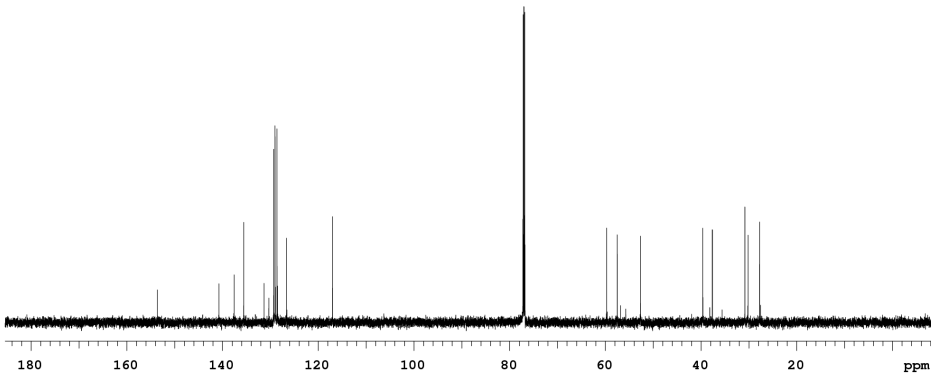

## ==== Shimadzu LCsolution Analysis Report ====

C:\LabSolutions\Data\BABI\RACEMIC-NRB-4-96-pCl-PHENYL-100-PCY3-5%IPA-0.75ml\_min.lcd  
 Acquired by : Admin  
 Sample Name : RACEMIC-NRB-4-96-pCl-PHENYL-100-PCY3-5%IPA-0.75ml\_min  
 Sample ID : <SAMPLE>  
 Tray# : 1  
 Vial # : 1  
 Injection Volume : 1 uL  
 Data File Name : RACEMIC-NRB-4-96-pCl-PHENYL-100-PCY3-5%IPA-0.75ml\_min.lcd  
 Method File Name : Cyclic Urea Method.lcm  
 Batch File Name :  
 Report File Name : Default.lcr  
 Data Acquired : 10/10/2012 2:52:59 PM  
 Data Processed : 10/10/2012 3:24:59 PM

### <Chromatogram>

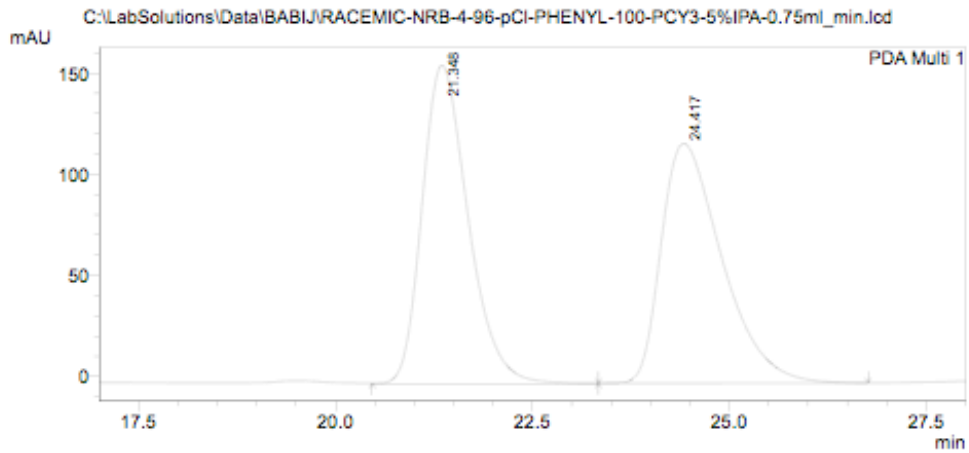

PeakTable

| Peak# | Ret. Time | Area     | Height | Area %  |
|-------|-----------|----------|--------|---------|
| 1     | 21.348    | 6370242  | 157244 | 50.083  |
| 2     | 24.417    | 6349172  | 118480 | 49.917  |
| Total |           | 12719414 | 275724 | 100.000 |

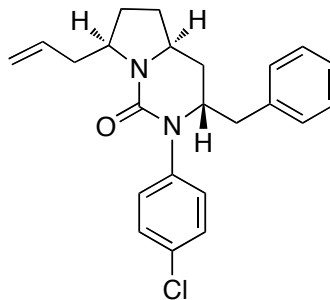

## ==== Shimadzu LCsolution Analysis Report ====

C:\LabSolutions\Data\BABI\CHIRAL-NRB-4-96-pCl-PHENYL-100-NaOtBu-SSIPHOSPE-5%IPA-0.75ml\_min.lcd  
 Acquired by : Admin  
 Sample Name : CHIRAL-NRB-4-96-pCl-PHENYL-100-NaOtBu-SSIPHOSPE-5%IPA-0.75ml\_mi  
 Sample ID : <SAMPLE>  
 Tray# : 1  
 Vial # : 1  
 Injection Volume : 1 uL  
 Data File Name : CHIRAL-NRB-4-96-pCl-PHENYL-100-NaOtBu-SSIPHOSPE-5%IPA-0.75ml\_min.lcd  
 Method File Name : Cyclic Urea Method.lcm  
 Batch File Name :  
 Report File Name : Default.lcr  
 Data Acquired : 10/10/2012 3:37:24 PM  
 Data Processed : 10/10/2012 4:11:56 PM

### <Chromatogram>

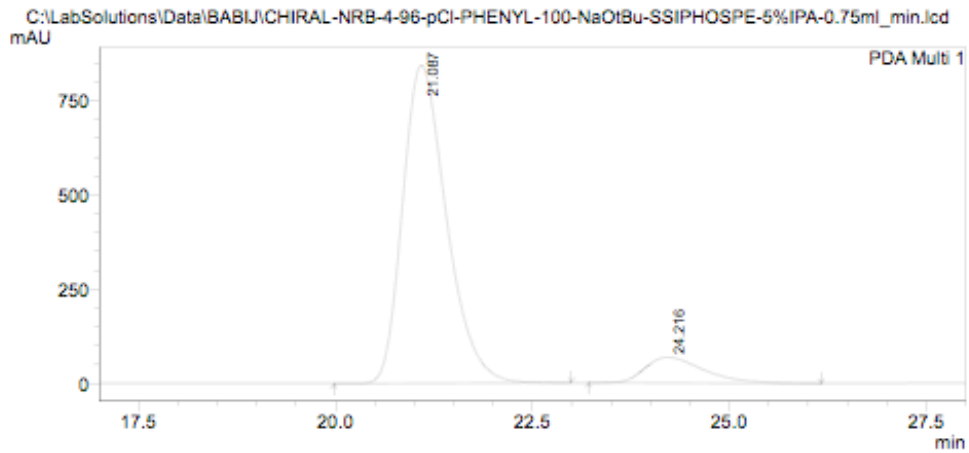

1 PDA Multi 1/245nm 4nm

PeakTable

| Peak# | Ret. Time | Area     | Height | Area %  |
|-------|-----------|----------|--------|---------|
| 1     | 21.087    | 32587442 | 843023 | 90.230  |
| 2     | 24.216    | 3528682  | 67790  | 9.770   |
| Total |           | 36116124 | 910813 | 100.000 |

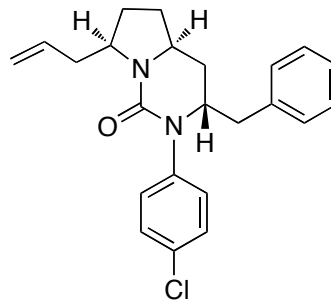

**8m**

Sample Name:  
Data Collected on:  
Yb-vnmrs700  
Archive directory:  
Sample directory:  
FidFile: NRB-4-136-X-1H-CF3  
Pulse Sequence: PROTON (s2pu1)  
Solvent: cdcl3  
Data collected on: Dec 21 2012

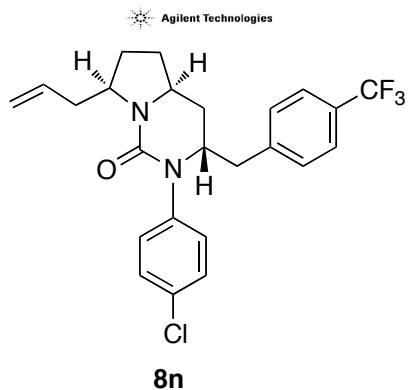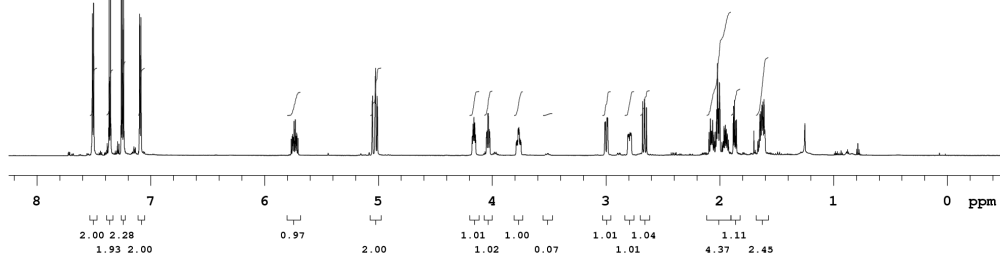

Sample Name:  
Data Collected on:  
Yb-vnmrs700  
Archive directory:  
Sample directory:  
FidFile: NRB-4-107-C-X-13C  
Pulse Sequence: CARBON (s2pu1)  
Solvent: cdcl3  
Data collected on: Nov 1 2012

Agilent Technologies

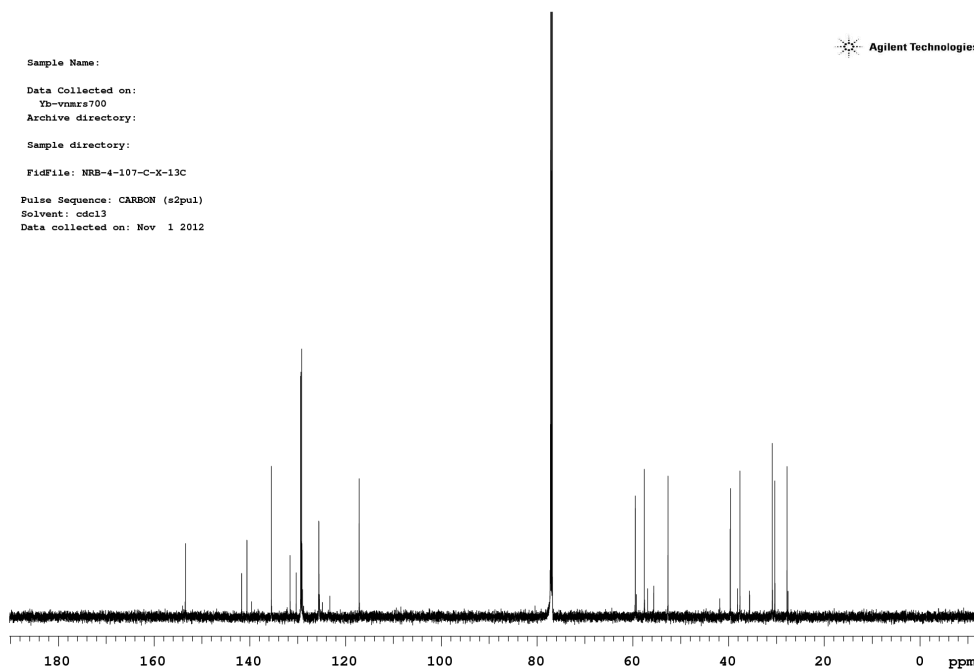



## ==== Shimadzu LCsolution Analysis Report ====

C:\LabSolutions\Data\BABI\RACEMIC-NRB-4-58-pCl-CF3-100-PCY3-5%IPA-0.75ml\_min.lcd  
 Acquired by : Admin  
 Sample Name : RACEMIC-NRB-4-58-pCl-CF3-100-PCY3-5%IPA-0.75ml\_min  
 Sample ID : <SAMPLE>  
 Tray# : 1  
 Vial # : 1  
 Injection Volume : 1 uL  
 Data File Name : RACEMIC-NRB-4-58-pCl-CF3-100-PCY3-5%IPA-0.75ml\_min.lcd  
 Method File Name : Cyclic Urea Method.lcm  
 Batch File Name :  
 Report File Name : Default.lcr  
 Data Acquired : 8/10/2012 1:42:35 PM  
 Data Processed : 8/10/2012 2:12:09 PM

### <Chromatogram>

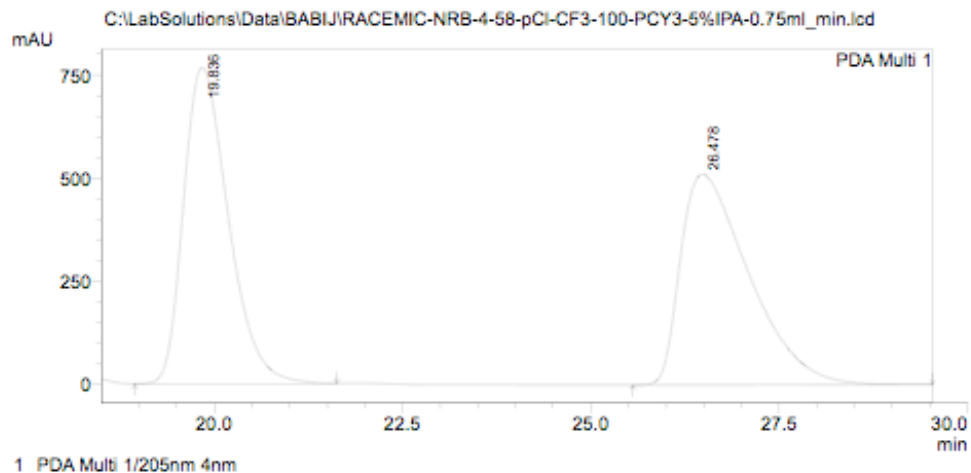

PeakTable

| Peak# | Ret. Time | Area     | Height  | Area %  |
|-------|-----------|----------|---------|---------|
| 1     | 19.836    | 31756926 | 766828  | 49.635  |
| 2     | 26.478    | 32223518 | 510700  | 50.365  |
| Total |           | 63980444 | 1277528 | 100.000 |

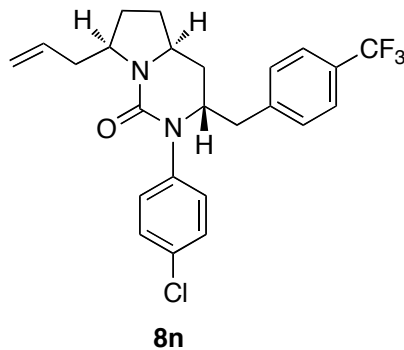

## ==== Shimadzu LCsolution Analysis Report ====

C:\LabSolutions\Data\BABI\CHIRAL-NRB-4-107-pCl-4-CF3-100-NaOtBu-SSIPHOSPE-5%IPA-0.75ml\_min.lcd  
 Acquired by : Admin  
 Sample Name : CHIRAL-NRB-4-107-pCl-4-CF3-100-NaOtBu-SSIPHOSPE-5%IPA-0.75ml\_m  
 Sample ID : <SAMPLE>  
 Tray# : 1  
 Vial # : 1  
 Injection Volume : 1 uL  
 Data File Name : CHIRAL-NRB-4-107-pCl-4-CF3-100-NaOtBu-SSIPHOSPE-5%IPA-0.75ml\_min.lcd  
 Method File Name : Cyclic Urea Method.lcm  
 Batch File Name :  
 Report File Name : Default.lcr  
 Data Acquired : 11/1/2012 1:56:29 PM  
 Data Processed : 11/1/2012 2:29:27 PM

### <Chromatogram>

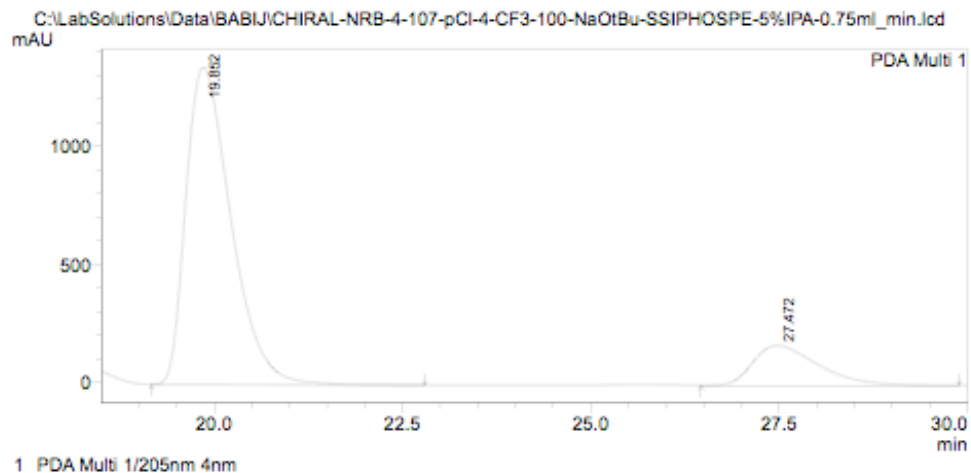

PeakTable

| Peak# | Ret. Time | Area     | Height  | Area %  |
|-------|-----------|----------|---------|---------|
| 1     | 19.852    | 55981453 | 1343838 | 84.851  |
| 2     | 27.472    | 9994947  | 167907  | 15.149  |
| Total |           | 65976400 | 1511745 | 100.000 |

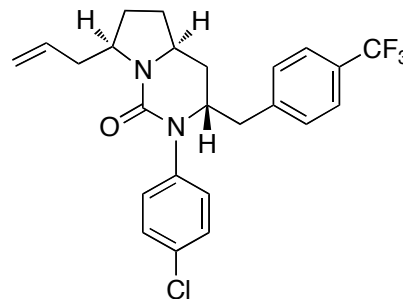

**8n** (with NaOtBu)

## ==== Shimadzu LCsolution Analysis Report ====

C:\LabSolutions\Data\BABI\CHIRAL-NRB-4-83-pCl-CF3-95-NAOME-SSIPHOSPE-5%IPA-0.75ml\_min.lcd  
 Acquired by : Admin  
 Sample Name : CHIRAL-NRB-4-83-pCl-CF3-95-NAOME-SSIPHOSPE-5%IPA-0.75ml\_min  
 Sample ID : <SAMPLE>  
 Tray# : 1  
 Vial # : 1  
 Injection Volume : 1 uL  
 Data File Name : CHIRAL-NRB-4-83-pCl-CF3-95-NAOME-SSIPHOSPE-5%IPA-0.75ml\_min.lcd  
 Method File Name : Cyclic Urea Method.lcm  
 Batch File Name :  
 Report File Name : Default.lcr  
 Data Acquired : 9/13/2012 7:30:51 PM  
 Data Processed : 9/13/2012 8:02:40 PM

### <Chromatogram>

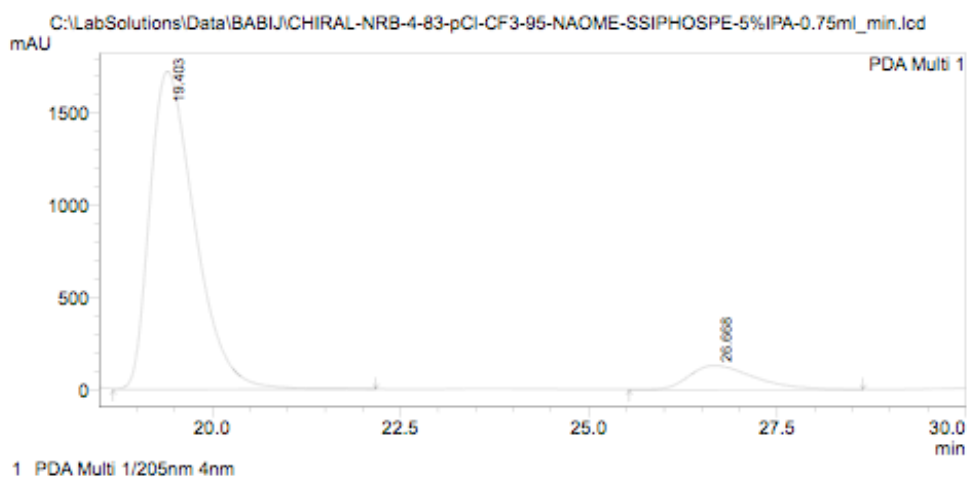

PeakTable

| Peak# | Ret. Time | Area     | Height  | Area %  |
|-------|-----------|----------|---------|---------|
| 1     | 19.403    | 71981301 | 1731362 | 90.036  |
| 2     | 26.668    | 7966346  | 131922  | 9.964   |
| Total |           | 79947647 | 1863284 | 100.000 |

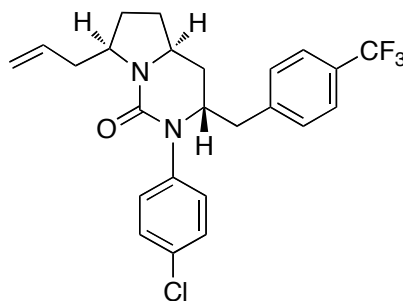

**8n** (with NaOMe)

Sample Name:  
Data Collected on:  
Yb-vnmrs700  
Archive directory:  
Sample directory:  
FidFile: NRB-4-105-X-C-1H-OCF3  
Pulse Sequence: PROTON (s2pul)  
Solvent: cdcl3  
Data collected on: Oct 25 2012

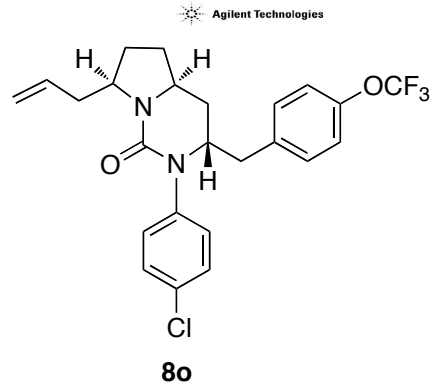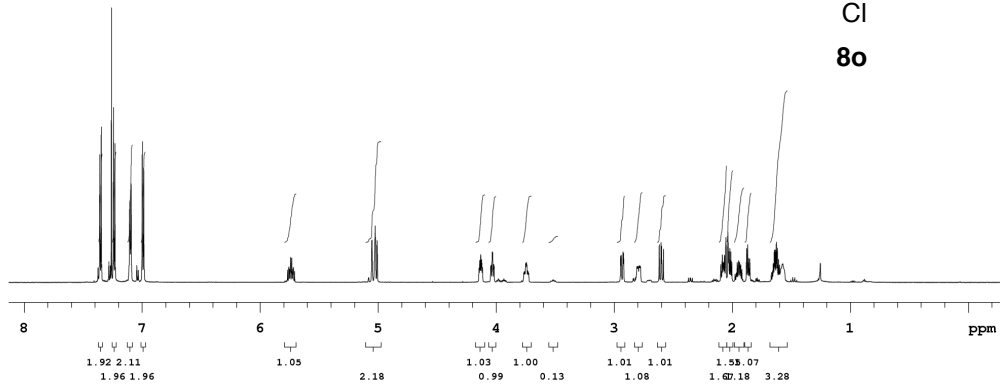

Sample Name:  
Data Collected on:  
Yb-vnmrs700  
Archive directory:  
Sample directory:  
FidFile: NRB-4-105-X-C-13C-OCF3  
Pulse Sequence: CARBON (s2pul)  
Solvent: cdcl3  
Data collected on: Oct 25 2012

Agilent Technologies

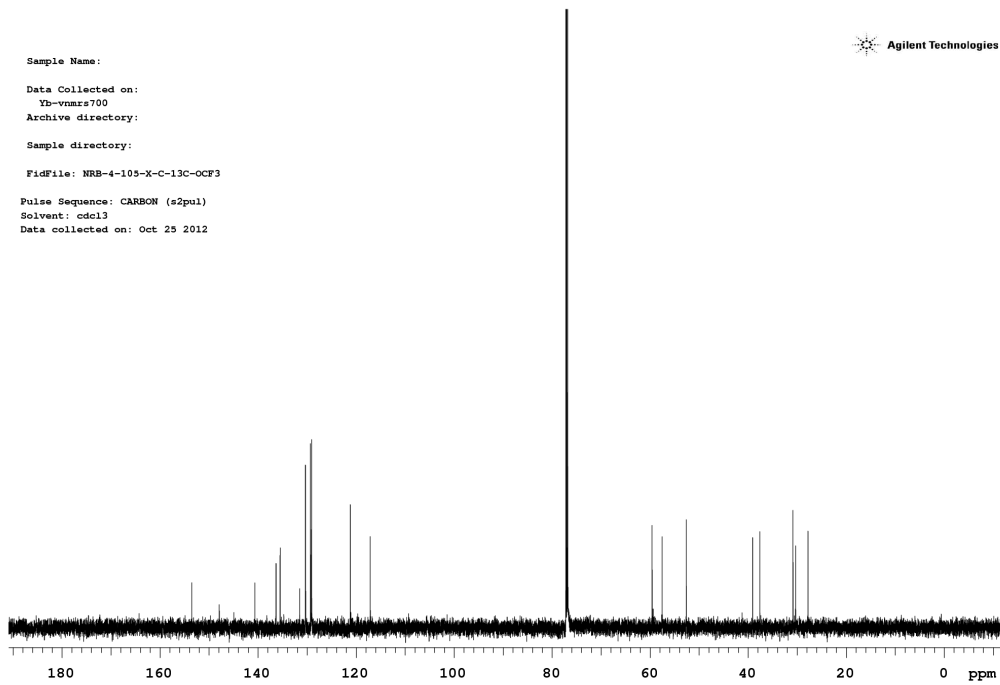

## ==== Shimadzu LCsolution Analysis Report ====

C:\LabSolutions\Data\BABU\RACEMIC-NRB-4-58-pCl-OCF3-100-PCY3-5%IPA-0.75ml\_min.lcd  
 Acquired by : Admin  
 Sample Name : RACEMIC-NRB-4-58-pCl-OCF3-100-PCY3-5%IPA-0.75ml\_min  
 Sample ID : <SAMPLE>  
 Tray# : 1  
 Vial # : 1  
 Injection Volume : 1 uL  
 Data File Name : RACEMIC-NRB-4-58-pCl-OCF3-100-PCY3-5%IPA-0.75ml\_min.lcd  
 Method File Name : Cyclic Urea Method.lcm  
 Batch File Name :  
 Report File Name : Default.lcr  
 Data Acquired : 8/10/2012 2:14:53 PM  
 Data Processed : 8/10/2012 2:40:44 PM

### <Chromatogram>

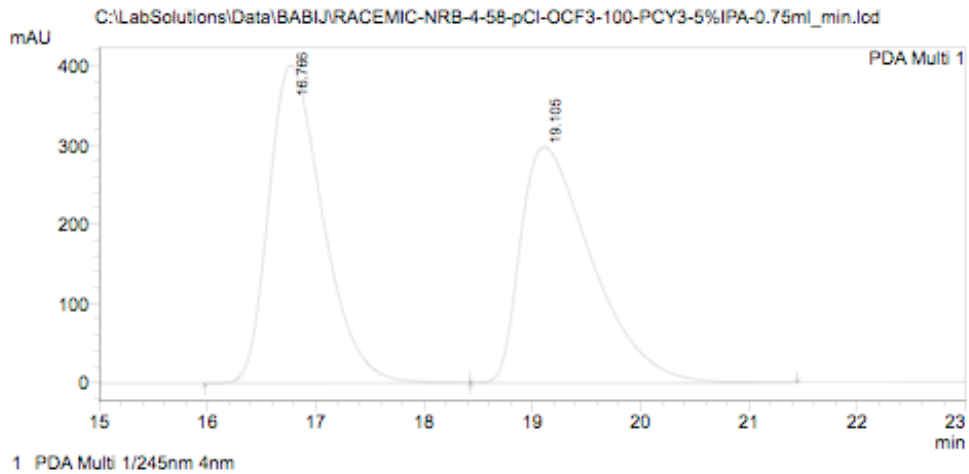

| PeakTable |           |          |        |         |
|-----------|-----------|----------|--------|---------|
| Peak#     | Ret. Time | Area     | Height | Area %  |
| 1         | 16.766    | 13936711 | 401672 | 50.472  |
| 2         | 19.105    | 13675829 | 298353 | 49.528  |
| Total     |           | 27612540 | 700025 | 100.000 |

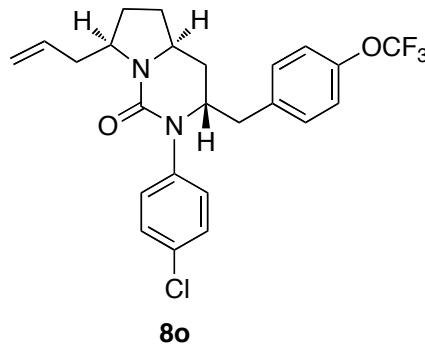

## ==== Shimadzu LCsolution Analysis Report ====

C:\LabSolutions\Data\BABIJ\CHIRAL-NRB-4-94-pCl-4-OCF3-100-NaOtBu-SSIPHOSPE-5%IPA-0.75ml\_min.lcd  
 Acquired by : Admin  
 Sample Name : CHIRAL-NRB-4-94-pCl-4-OCF3-100-NaOtBu-SSIPHOSPE-5%IPA-0.75ml\_mi  
 Sample ID : <SAMPLE>  
 Tray# : 1  
 Vial # : 1  
 Injection Volume : 1 uL  
 Data File Name : CHIRAL-NRB-4-94-pCl-4-OCF3-100-NaOtBu-SSIPHOSPE-5%IPA-0.75ml\_min.lcd  
 Method File Name : Cyclic Urea Method.lcm  
 Batch File Name :  
 Report File Name : Default.lcr  
 Data Acquired : 10/4/2012 10:46:14 AM  
 Data Processed : 10/4/2012 11:09:47 AM

### <Chromatogram>

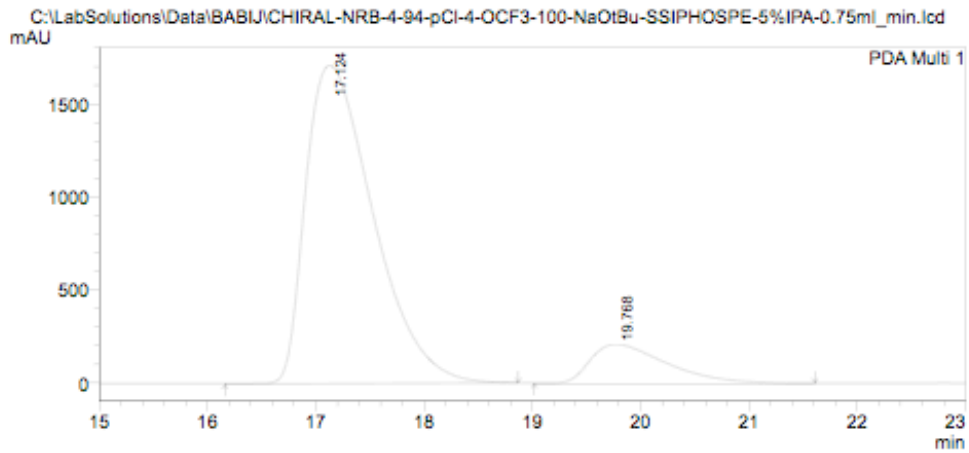

PeakTable

PDA Ch1 245nm 4nm

| Peak# | Ret. Time | Area     | Height  | Area %  |
|-------|-----------|----------|---------|---------|
| 1     | 17.124    | 74360169 | 1711279 | 87.935  |
| 2     | 19.768    | 10202360 | 209358  | 12.065  |
| Total |           | 84562529 | 1920637 | 100.000 |

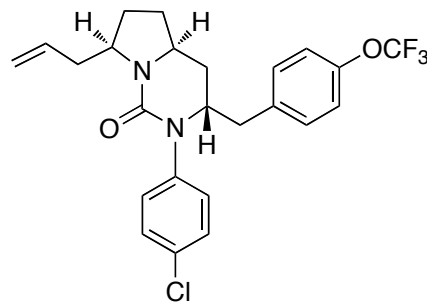

**8o** (with NaOtBu)

## ==== Shimadzu LCsolution Analysis Report ====

C:\LabSolutions\Data\BABIJ\CHIRAL-NRB-4-137-II-pCl-OCF3-100-NaOMe-SSIPHOSPE-5%IPA-0.75ml\_min.lcd  
 Acquired by : Admin  
 Sample Name : CHIRAL-NRB-4-137-I-pCl-OCF3-100-NaOMe-SSIPHOSPE-5%IPA-0.75ml\_mi  
 Sample ID : <SAMPLE>  
 Tray# : 1  
 Vial # : 1  
 Injection Volume : 1 uL  
 Data File Name : CHIRAL-NRB-4-137-II-pCl-OCF3-100-NaOMe-SSIPHOSPE-5%IPA-0.75ml\_min.lcd  
 Method File Name : Cyclic Urea Method.lcm  
 Batch File Name :  
 Report File Name : Default.lcr  
 Data Acquired : 12/23/2012 5:45:35 PM  
 Data Processed : 12/23/2012 6:13:19 PM

### <Chromatogram>

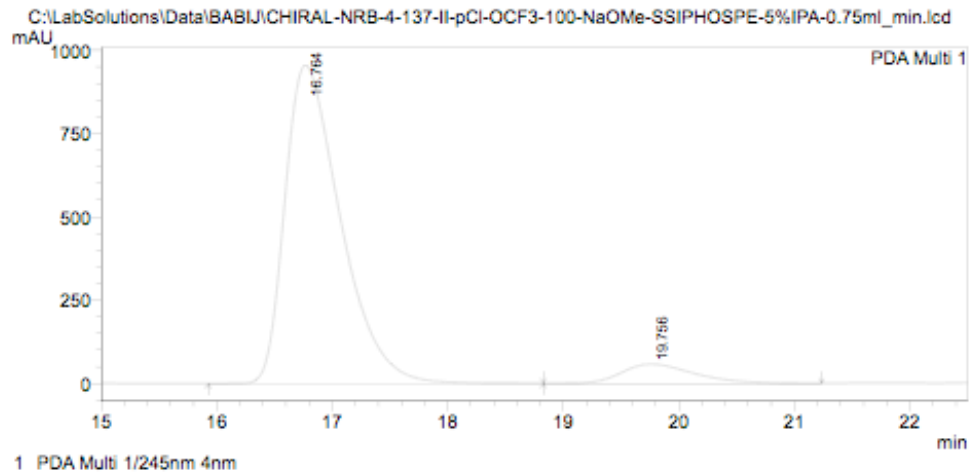

PeakTable

| Peak# | Ret. Time | Area     | Height  | Area %  |
|-------|-----------|----------|---------|---------|
| 1     | 16.764    | 31880825 | 954387  | 92.755  |
| 2     | 19.756    | 2490104  | 57122   | 7.245   |
| Total |           | 34370929 | 1011509 | 100.000 |

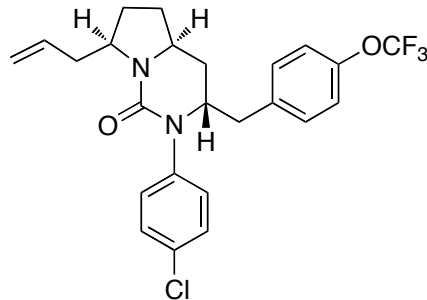

**8o** (with NaOMe)

Sample Name:  
 Data Collected on:  
 Yb-vnmrs700  
 Archive directory:  
 Sample directory:  
 FidFile: NRB-4-121-X-3OMe  
 Pulse Sequence: PROTON (s2pul)  
 Solvent: cdcl3  
 Data collected on: Dec 6 2012

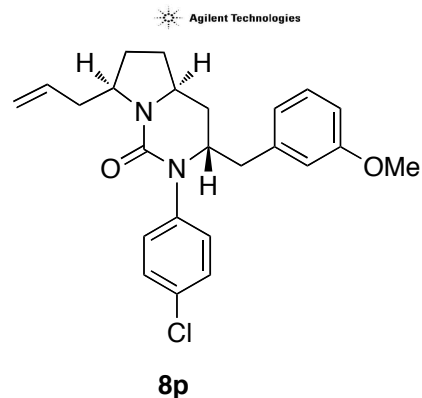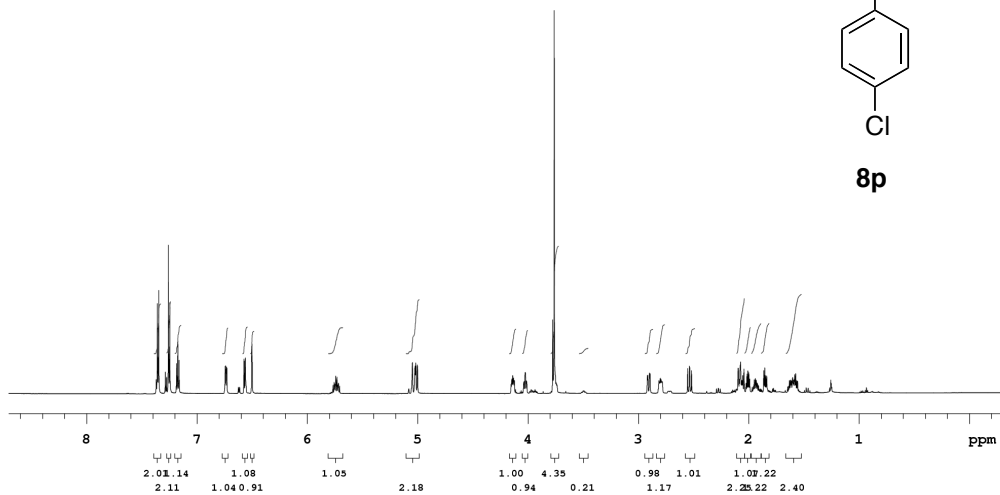

Sample Name:  
 Data Collected on:  
 Yb-vnmrs700  
 Archive directory:  
 Sample directory:  
 FidFile: NRB-4-105-D-X-13C-3OMe  
 Pulse Sequence: CARBON (s2pul)  
 Solvent: cdcl3  
 Data collected on: Oct 25 2012

Agilent Technologies

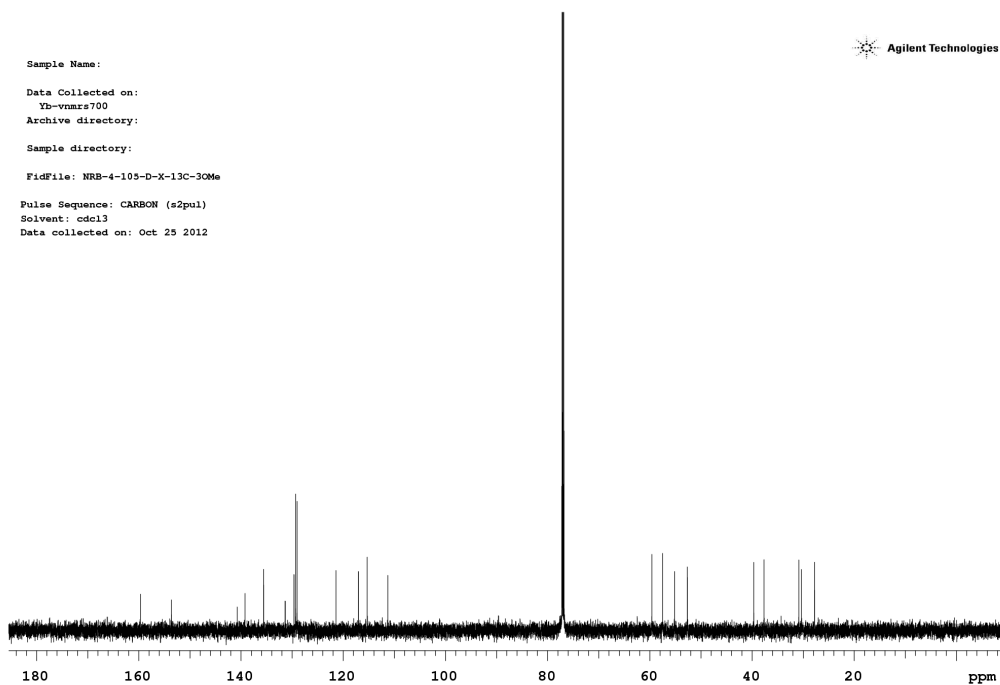



## ==== Shimadzu LCsolution Analysis Report ====

C:\LabSolutions\Data\BABI\RACEMIC-NRB-4-90-pCl-3-OMe-100-PCY3-5%IPA-0.75ml\_min.lcd  
 Acquired by : Admin  
 Sample Name : RACEMIC-NRB-4-90-pCl-3-OMe-100-PCY3-5%IPA-0.75ml\_min  
 Sample ID : <SAMPLE>  
 Tray# : 1  
 Vial # : 1  
 Injection Volume : 1 uL  
 Data File Name : RACEMIC-NRB-4-90-pCl-3-OMe-100-PCY3-5%IPA-0.75ml\_min.lcd  
 Method File Name : Cyclic Urea Method.lcm  
 Batch File Name :  
 Report File Name : Default.lcr  
 Data Acquired : 9/25/2012 7:29:03 PM  
 Data Processed : 9/25/2012 8:05:08 PM

### <Chromatogram>

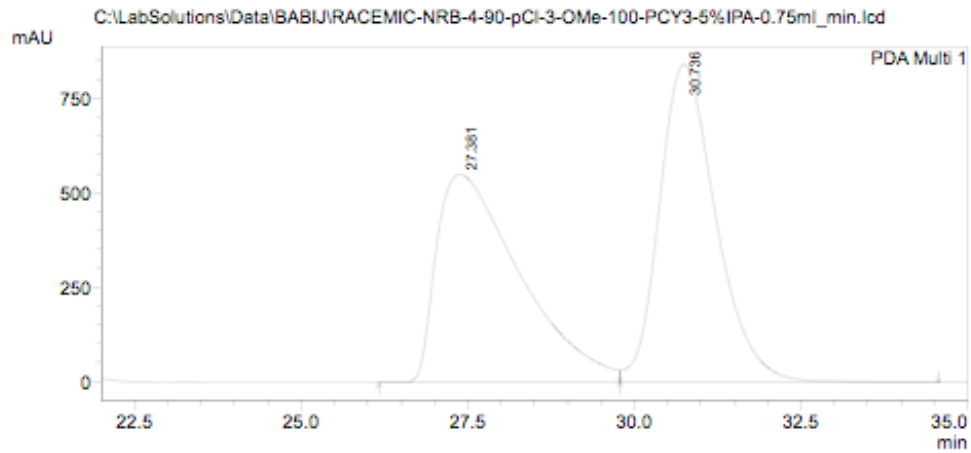

| PeakTable |           |          |         |         |
|-----------|-----------|----------|---------|---------|
| Peak#     | Ret. Time | Area     | Height  | Area %  |
| 1         | 27.381    | 48187230 | 552654  | 49.026  |
| 2         | 30.736    | 50102213 | 843446  | 50.974  |
| Total     |           | 98289443 | 1396100 | 100.000 |

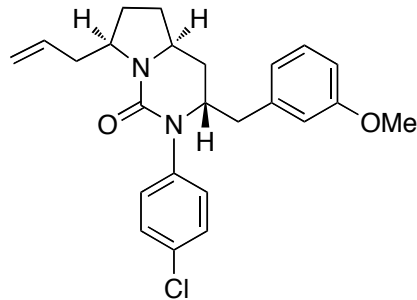

**8p**

## ==== Shimadzu LCsolution Analysis Report ====

C:\LabSolutions\Data\BABI\CHIRAL-NRB-4-94-pCl-3-OMe-100-NaOtBu-SSIPHOSPE-5%IPA-0.75ml\_min.lcd  
 Acquired by : Admin  
 Sample Name : CHIRAL-NRB-4-94-pCl-3-OMe-100-NaOtBu-SSIPHOSPE-5%IPA-0.75ml  
 Sample ID : <SAMPLE>  
 Tray# : 1  
 Vial # : 1  
 Injection Volume : 1 uL  
 Data File Name : CHIRAL-NRB-4-94-pCl-3-OMe-100-NaOtBu-SSIPHOSPE-5%IPA-0.75ml\_min.lcd  
 Method File Name : Cyclic Urea Method.lcm  
 Batch File Name :  
 Report File Name : Default.lcr  
 Data Acquired : 10/4/2012 3:33:10 PM  
 Data Processed : 10/4/2012 4:08:43 PM

### <Chromatogram>

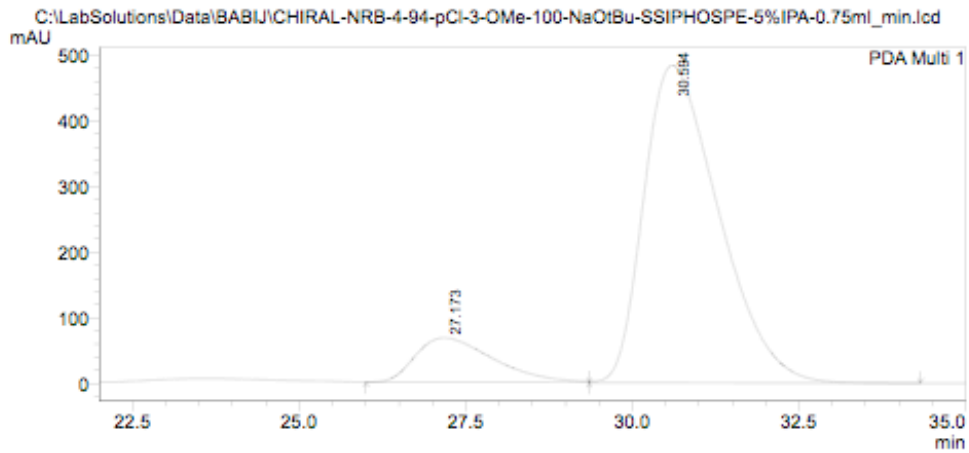

PeakTable

| PDA Ch1 248nm 4nm |           |          |        |         |
|-------------------|-----------|----------|--------|---------|
| Peak#             | Ret. Time | Area     | Height | Area %  |
| 1                 | 27.173    | 5497076  | 67634  | 12.683  |
| 2                 | 30.594    | 37845830 | 483921 | 87.317  |
| Total             |           | 43342907 | 551556 | 100.000 |

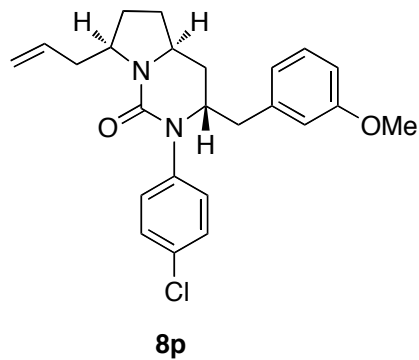

Sample Name:  
Data Collected on:  
Yb-vnmrs700  
Archive directory:  
Sample directory:  
FidFile: NRB-4-117-X-1H-2naphthyl  
Pulse Sequence: PROTON (s2pul)  
Solvent: cdcl3  
Data collected on: Dec 1 2012

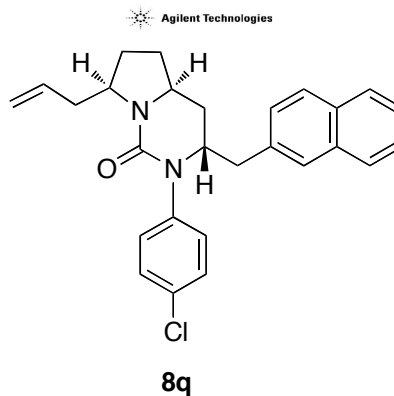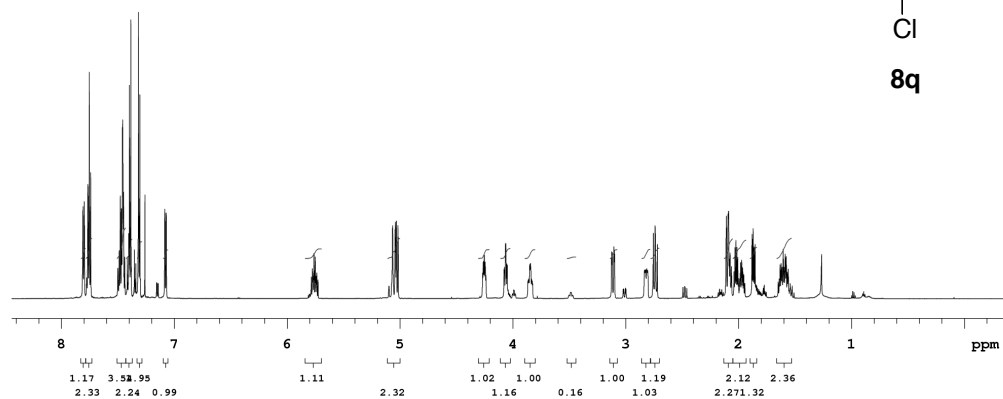

Sample Name:  
Data Collected on:  
Yb-vnmrs700  
Archive directory:  
Sample directory:  
FidFile: NRB-4-107-B-X-13C  
Pulse Sequence: CARBON (s2pul)  
Solvent: cdcl3  
Data collected on: Nov 1 2012

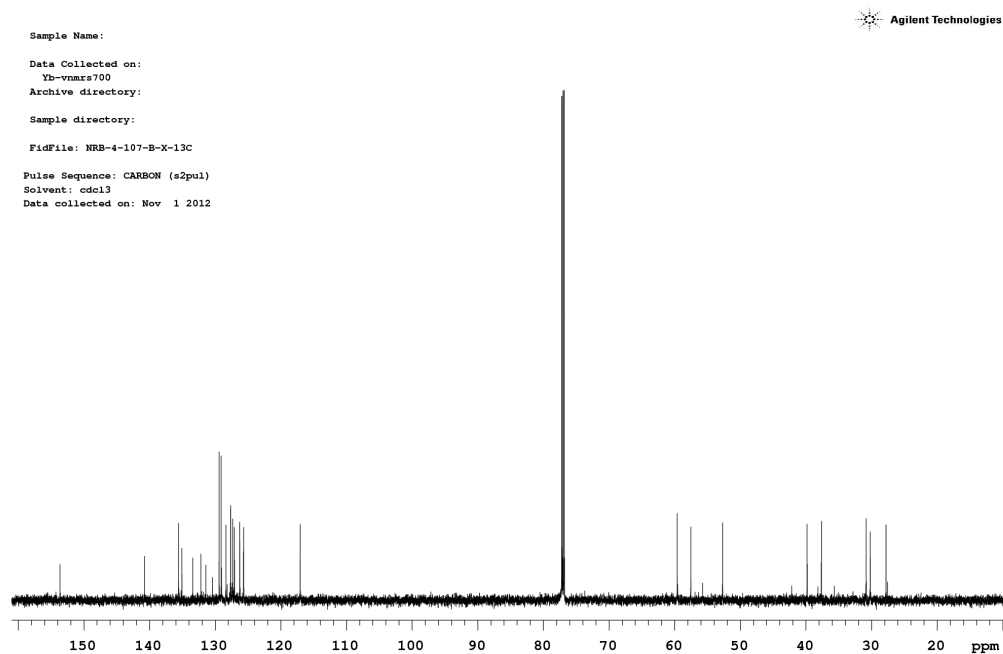

## ==== Shimadzu LCsolution Analysis Report ====

C:\LabSolutions\Data\BABI\RACEMIC-NRB-4-90-pCl-2-naphthyl-100-PCY3-5%IPA-0.75ml\_min.lcd  
 Acquired by : Admin  
 Sample Name : RACEMIC-NRB-4-90-pCl-2-naphthyl-100-PCY3-5%IPA-0.75ml\_min.lcd  
 Sample ID : <SAMPLE>  
 Tray# : 1  
 Vial # : 1  
 Injection Volume : 1 uL  
 Data File Name : RACEMIC-NRB-4-90-pCl-2-naphthyl-100-PCY3-5%IPA-0.75ml\_min.lcd  
 Method File Name : Cyclic Urea Method.lcm  
 Batch File Name :  
 Report File Name : Default.lcr  
 Data Acquired : 9/26/2012 1:51:54 PM  
 Data Processed : 9/26/2012 2:25:26 PM

### <Chromatogram>

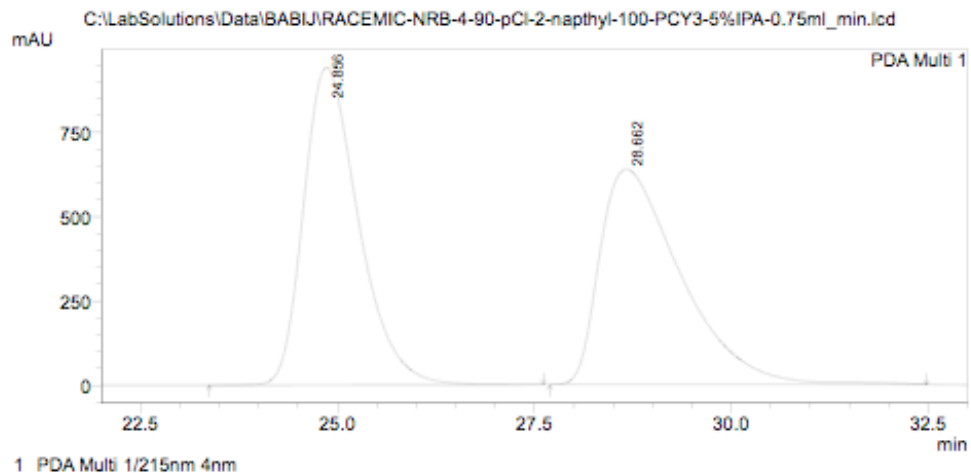

PeakTable

| Peak# | Ret. Time | Area     | Height  | Area %  |
|-------|-----------|----------|---------|---------|
| 1     | 24.856    | 45755831 | 941390  | 49.764  |
| 2     | 28.662    | 46190576 | 639545  | 50.236  |
| Total |           | 91946407 | 1580935 | 100.000 |

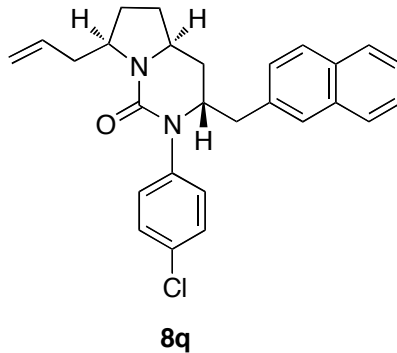

## ==== Shimadzu LCsolution Analysis Report ====

C:\LabSolutions\Data\BABI\CHIRAL-NRB-4-107-2-pCl-2-naphyl-100-NaOtBu-SSIPHOSPE-5%IPA-0.75ml\_min.lcd  
 Acquired by : Admin  
 Sample Name : CHIRAL-NRB-4-107-2-pCl-2-naph-100-SSIPHOSPE-5%IPA-0.75ml\_  
 Sample ID : <SAMPLE>  
 Tray# : 1  
 Vial # : 1  
 Injection Volume : 1 uL  
 Data File Name : CHIRAL-NRB-4-107-2-pCl-2-naphyl-100-NaOtBu-SSIPHOSPE-5%IPA-0.75ml\_min.lcd  
 Method File Name : Cyclic Urea Method.lcm  
 Batch File Name :  
 Report File Name : Default.lcr  
 Data Acquired : 10/31/2012 5:21:45 PM  
 Data Processed : 10/31/2012 6:05:47 PM

### <Chromatogram>

C:\LabSolutions\Data\BABI\CHIRAL-NRB-4-107-2-pCl-2-naphyl-100-NaOtBu-SSIPHOSPE-5%IPA-0.75ml\_min.lcd  
 mAU

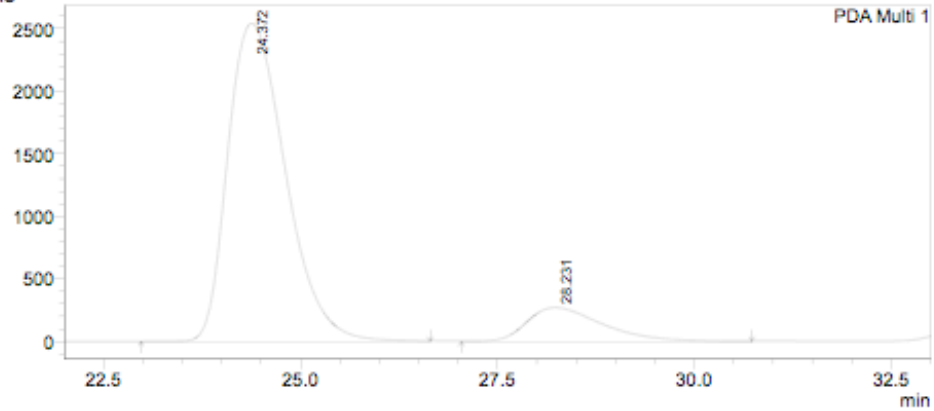

PeakTable

| Peak# | Ret. Time | Area      | Height  | Area %  |
|-------|-----------|-----------|---------|---------|
| 1     | 24.372    | 129657052 | 2544179 | 87.682  |
| 2     | 28.231    | 18215094  | 271035  | 12.318  |
| Total |           | 147872146 | 2815214 | 100.000 |

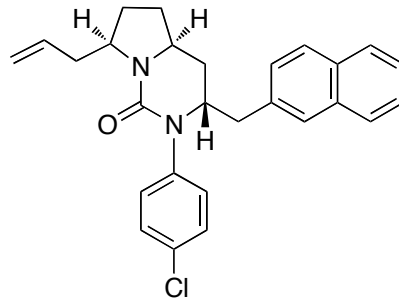

Sample Name:  
 Data Collected on:  
 Yb-vnmrs700  
 Archive directory:  
 Sample directory:  
 FidFile: NRB-4-116-K-1H-2tol  
 Pulse Sequence: PROTON (s2pul)  
 Solvent: cdcl3  
 Data collected on: Nov 30 2012

Agilent Technologies

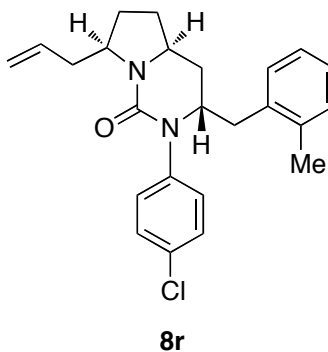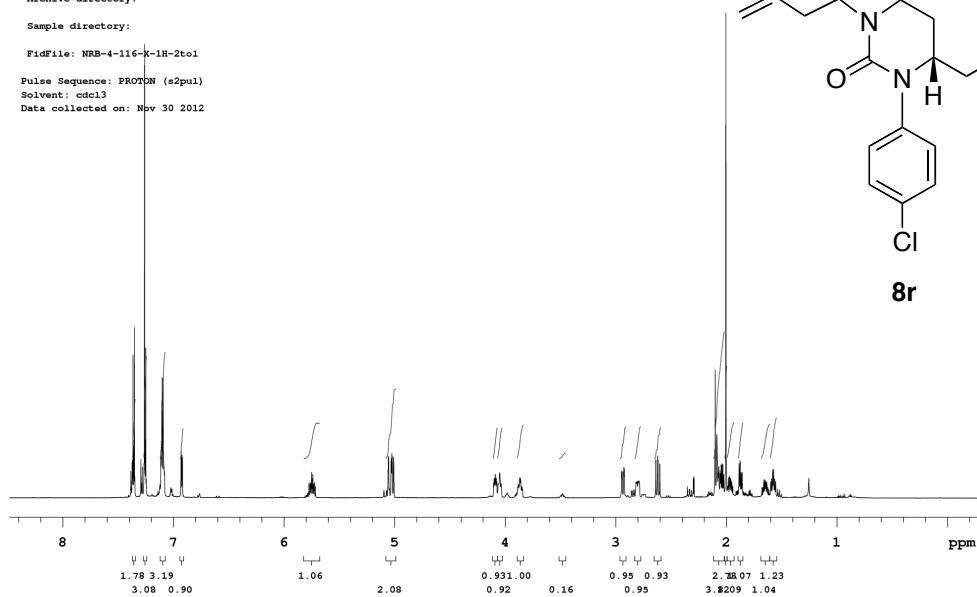

Sample Name:  
 Data Collected on:  
 Yb-vnmrs700  
 Archive directory:  
 Sample directory:  
 FidFile: NRB-4-107-X-A-13C  
 Pulse Sequence: CARBON (s2pul)  
 Solvent: cdcl3  
 Data collected on: Nov 1 2012

Agilent Technologies

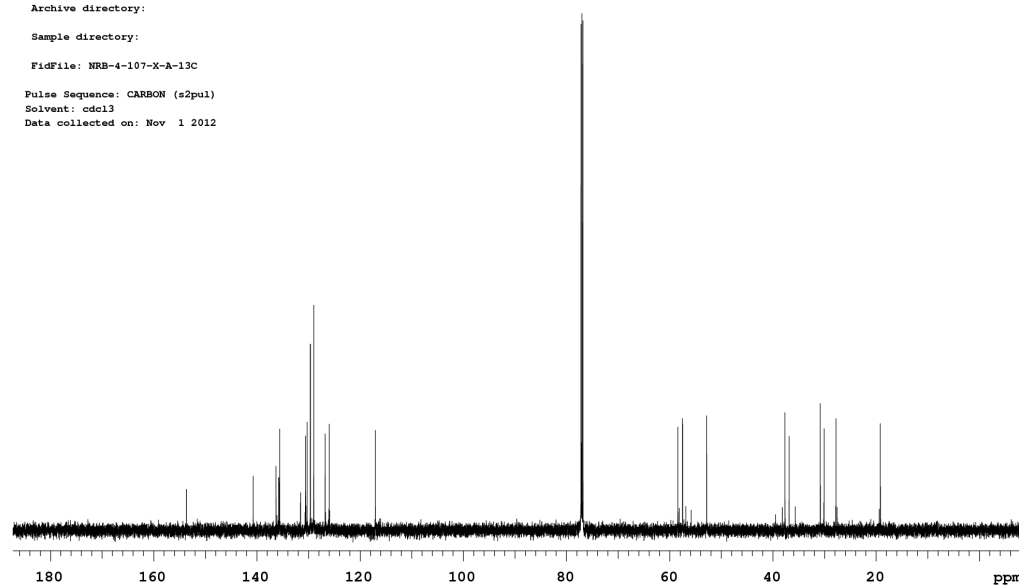

## ==== Shimadzu LCsolution Analysis Report ====

C:\LabSolutions\Data\BABI\RACEMIC-NRB-4-90-pCl-2-tolyl-100-PCY3-5%IPA-0.75ml\_min.lcd  
 Acquired by : Admin  
 Sample Name : RACEMIC-NRB-4-90-pCl-2-tolyl-100-PCY3-5%IPA-0.75ml\_min  
 Sample ID : <SAMPLE>  
 Tray# : 1  
 Vial # : 1  
 Injection Volume : 1 uL  
 Data File Name : RACEMIC-NRB-4-90-pCl-2-tolyl-100-PCY3-5%IPA-0.75ml\_min.lcd  
 Method File Name : Cyclic Urea Method.lcm  
 Batch File Name :  
 Report File Name : Default.lcr  
 Data Acquired : 9/26/2012 11:30:07 AM  
 Data Processed : 9/26/2012 12:10:21 PM

### <Chromatogram>

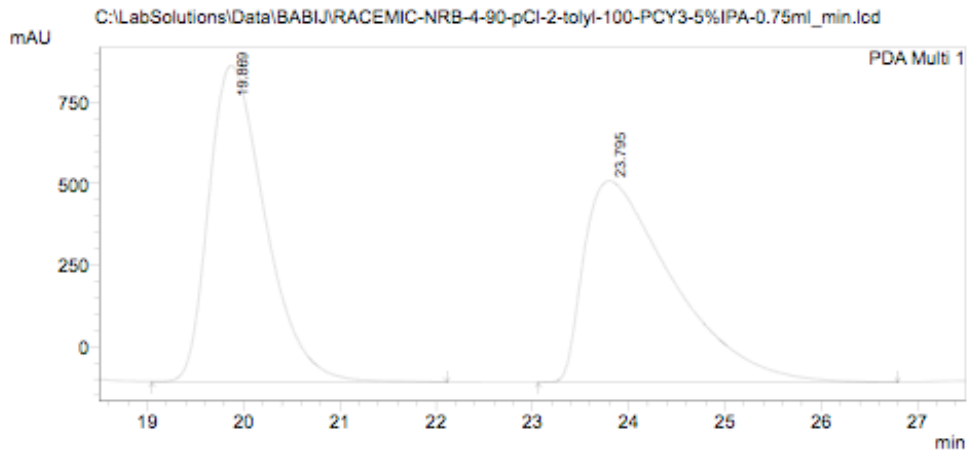

PeakTable

| Peak# | Ret. Time | Area     | Height  | Area %  |
|-------|-----------|----------|---------|---------|
| 1     | 19.869    | 39671328 | 972024  | 49.912  |
| 2     | 23.795    | 39810829 | 618614  | 50.088  |
| Total |           | 79482157 | 1590638 | 100.000 |

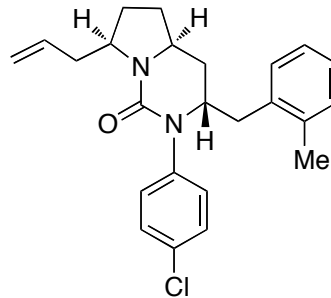

**8r**

## ==== Shimadzu LCsolution Analysis Report ====

C:\LabSolutions\Data\BABI\CHIRAL-NRB-4-107-pCl-2-tolyl-100-NaOtBu-SSIPHOSPE-5%IPA-0.75ml\_min.lcd  
 Acquired by : Admin  
 Sample Name : CHIRAL-NRB-4-107-pCl-2-tolyl-100-NaOtBu-SSIPHOSPE-5%IPA-0.75ml\_  
 Sample ID : <SAMPLE>  
 Tray# : 1  
 Vial # : 1  
 Injection Volume : 1 uL  
 Data File Name : CHIRAL-NRB-4-107-pCl-2-tolyl-100-NaOtBu-SSIPHOSPE-5%IPA-0.75ml\_min.lcd  
 Method File Name : Cyclic Urea Method.lcm  
 Batch File Name :  
 Report File Name : Default.lcr  
 Data Acquired : 10/31/2012 3:36:37 PM  
 Data Processed : 10/31/2012 4:33:50 PM

### <Chromatogram>

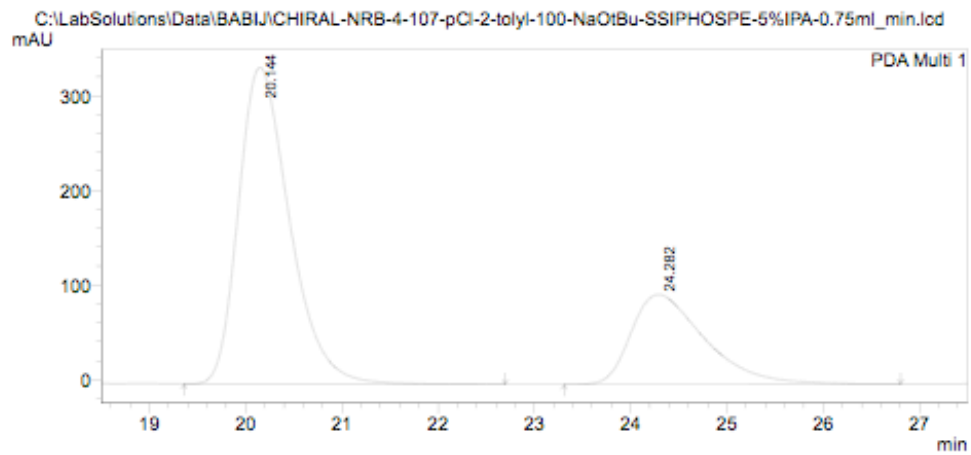

1 PDA Multi 1/215nm 4nm

PeakTable

| PDA Ch1 215nm 4nm |           |          |        |         |
|-------------------|-----------|----------|--------|---------|
| Peak#             | Ret. Time | Area     | Height | Area %  |
| 1                 | 20.144    | 12340532 | 334865 | 70.853  |
| 2                 | 24.282    | 5076517  | 94929  | 29.147  |
| Total             |           | 17417049 | 429794 | 100.000 |

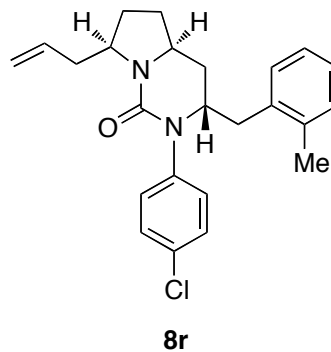



Sample Name:  
Data Collected on:  
Yb-vnmrs700  
Archive directory:  
Sample directory:  
FidFile: NRB-4-110-1R  
Pulse Sequence: PROTON (s2pul)  
Solvent: cdcl3  
Data collected on: Nov 13 2012

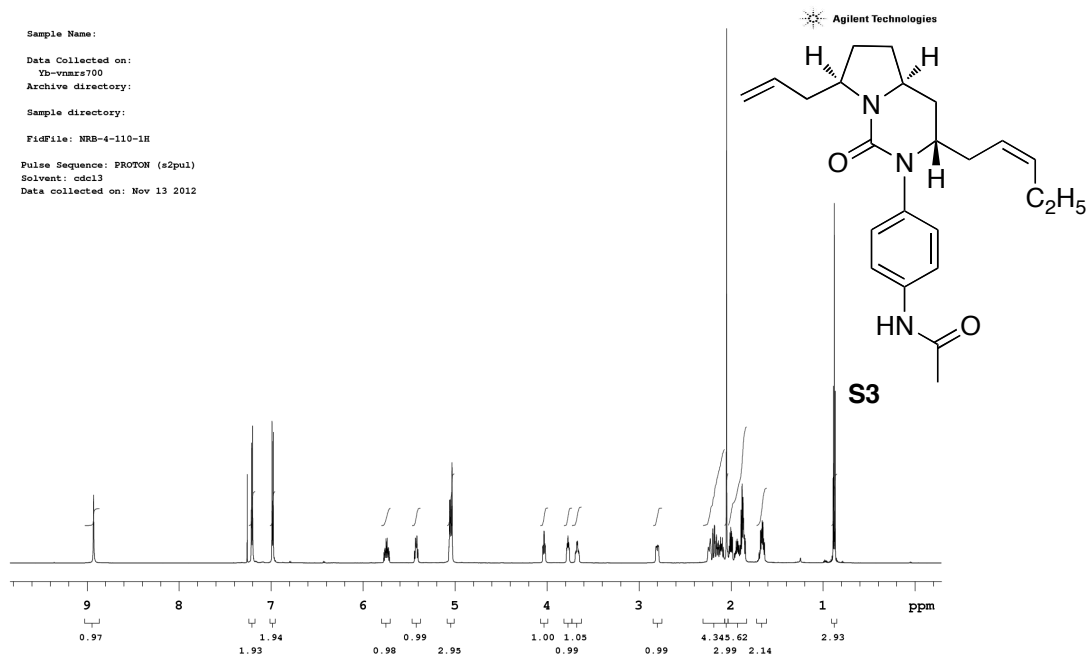

Sample Name:  
Data Collected on:  
Yb-vnmrs700  
Archive directory:  
Sample directory:  
FidFile: NRB-4-118-13C  
Pulse Sequence: CARBON (s2pul)  
Solvent: cdcl3  
Data collected on: Dec 1 2012

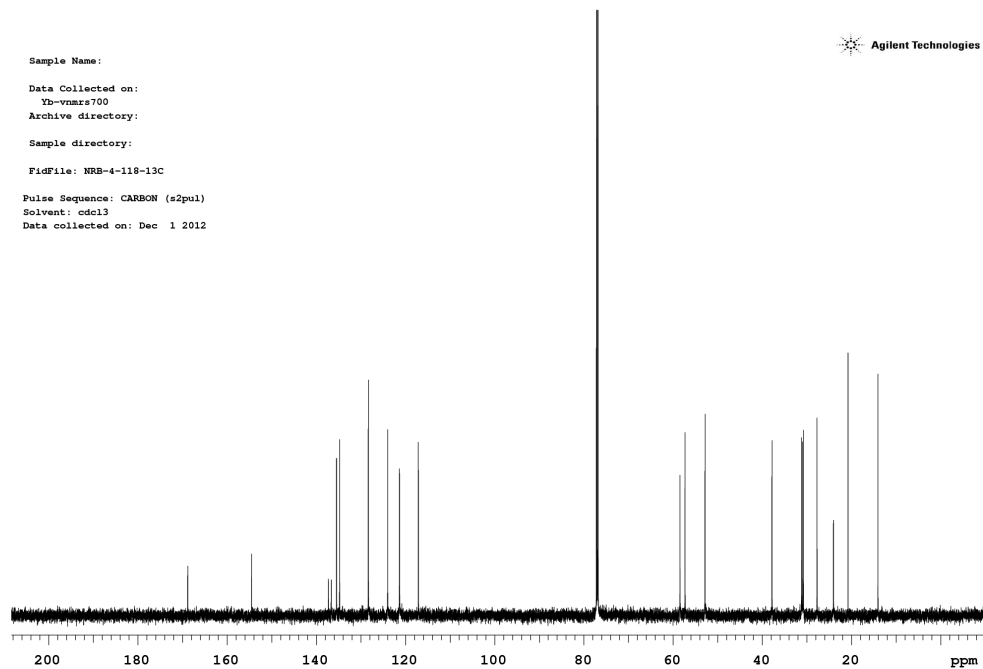

Sample Name:  
Data Collected on:  
Sn.Chem.LSA.UMich.edu-inova500  
Archive directory:  
Sample directory:  
FidFile: NRB-4-122-1H  
Pulse Sequence: PROTON (s2pu1)  
Solvent: cdcl3  
Data collected on: Dec 13 2012

Agilent Technologies

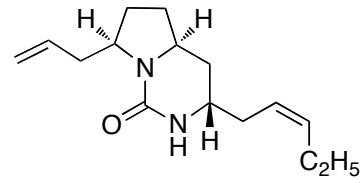

9

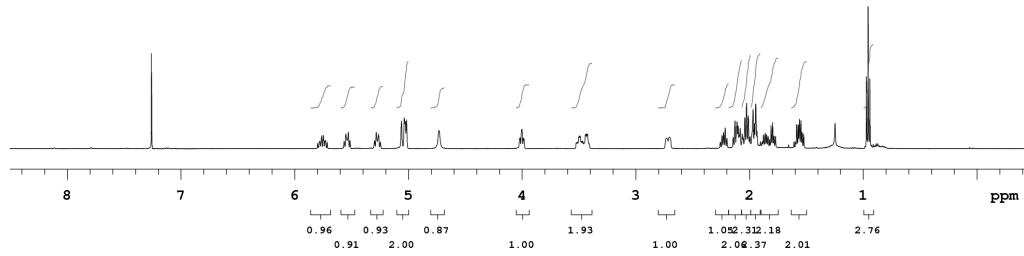

Sample Name:  
Data Collected on:  
Yb-vnmrs700  
Archive directory:  
Sample directory:  
FidFile: NRB-4-126-X-13C  
Pulse Sequence: CARBON (s2pu1)  
Solvent: cdcl3  
Data collected on: Dec 18 2012

Agilent Technologies

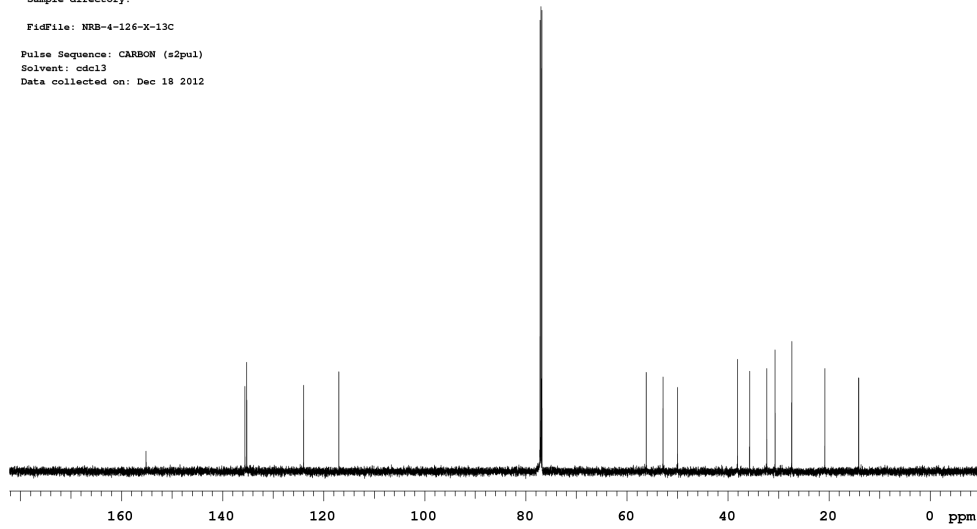

STANDARD 1H OBSERVE - profile

Sample Name:

Data Collected on:

Yb-vnmrs700

Archive directory:

Sample directory:

FidFile: NRB-4-100-1H-guanidine

Pulse Sequence: PROTON (s2pul)

Solvent: cdcl3

Data collected on: Feb 4 2013

Agilent Technologies

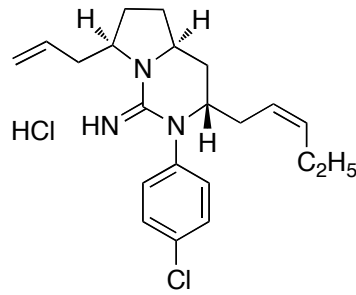

10

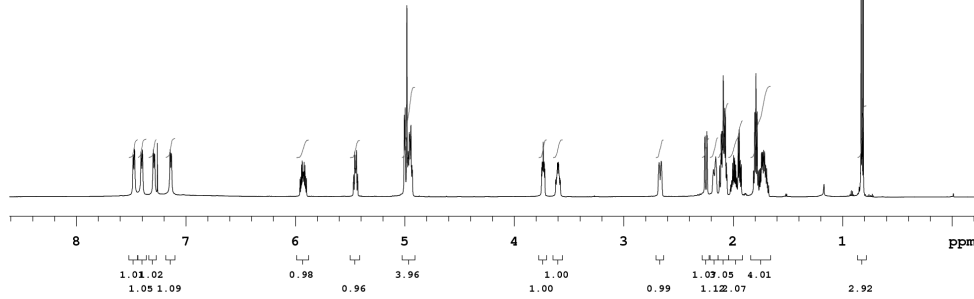

Sample Name:

Data Collected on:

Yb-vnmrs700

Archive directory:

Sample directory:

FidFile: NRB-4-100-13C

Pulse Sequence: CARBON (s2pul)

Solvent: cdcl3

Data collected on: Oct 23 2012

Agilent Technologies

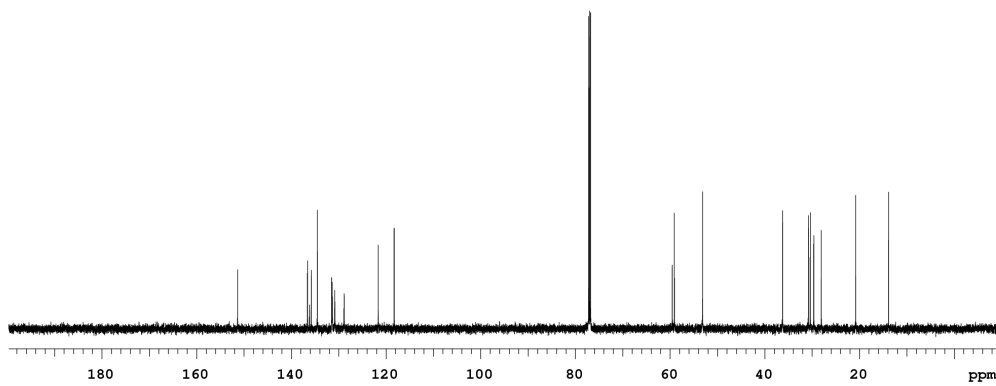

STANDARD PROTON PARAMETERS

Sample Name:  
 Data Collected on:  
 Te-vnmrs500  
 Archive directory:  
 Sample directory:  
 FidFile: NRB-4-158-A-1H  
 Pulse Sequence: PROTON (s2pul)  
 Solvent: cdcl3  
 Data collected on: Feb 19 2013

Agilent Technologies

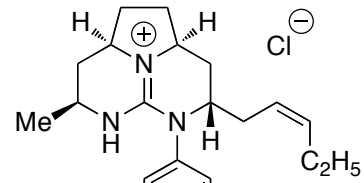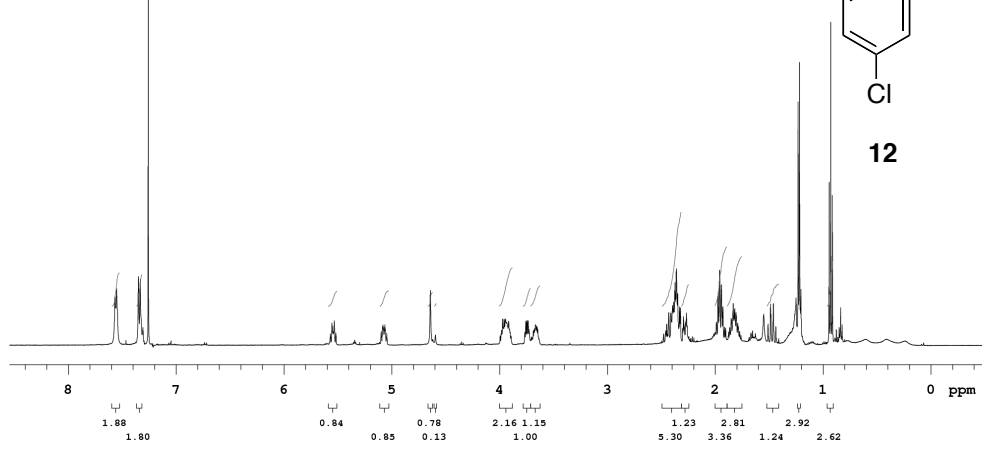

Sample Name:  
 Data Collected on:  
 Yb-vnmrs700  
 Archive directory:  
 Sample directory:  
 FidFile: NRB-4-158-13C  
 Pulse Sequence: CARBON (s2pul)  
 Solvent: cdcl3  
 Data collected on: Feb 19 2013

Agilent Technologies

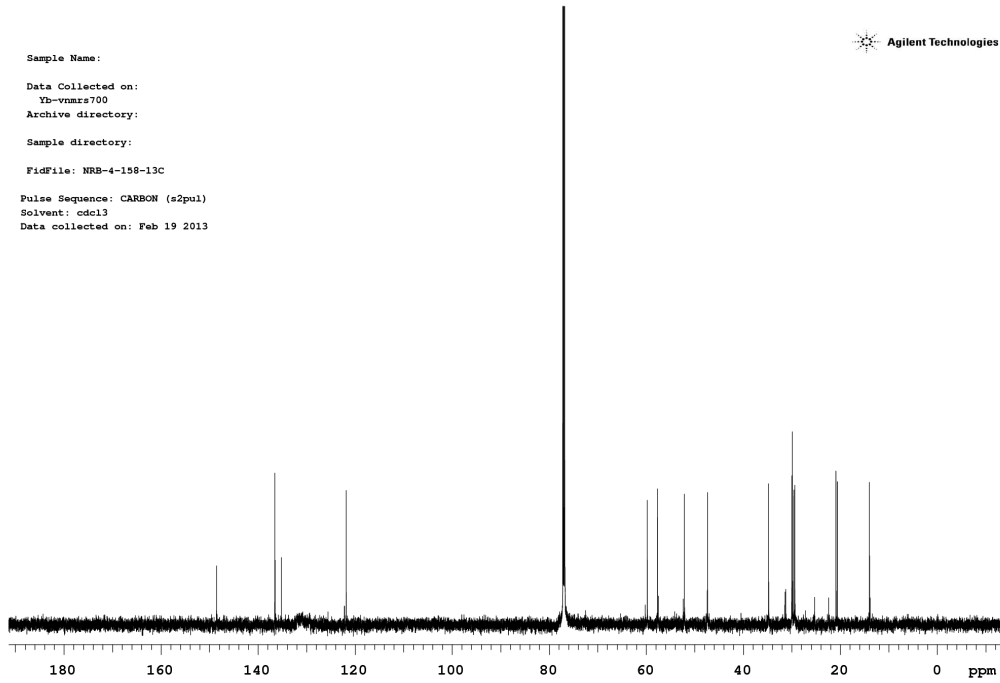

STANDARD 1H OBSERVE - profile

Agilent Technologies

Sample Name:

Data Collected on:

Yb-vnars700

Archive directory:

Sample directory:

FidFile: NRB-4-158-cozy

Pulse Sequence: gCOSY

Solvent: cdcl3

Data collected on: Feb 19 2013

Operator: nbabij

Relax. delay 1.000 sec

Acq. time 0.150 sec

Width 6983.2 Hz

2D Width 6983.2 Hz

2 repetitions

128 increments

OBSERVE H1, 699.7567665 MHz

DATA PROCESSING

Sq. sine bell 0.075 sec

F1 DATA PROCESSING

Sq. sine bell 0.018 sec

FT size 4096 x 4096

Total time 5 min 41 sec

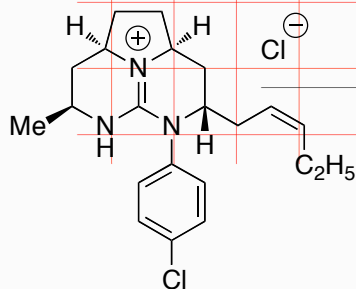

12

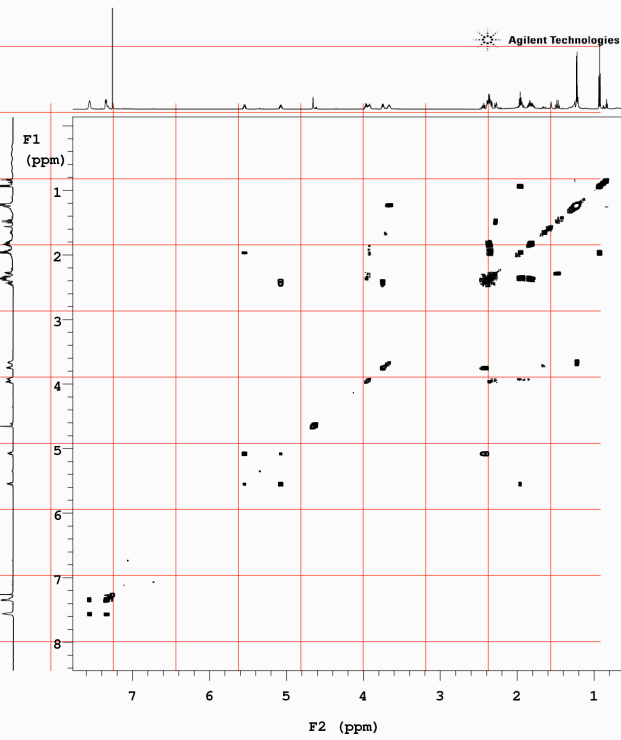

STANDARD 1H OBSERVE - profile

Agilent Technologies

Sample Name:

Data Collected on:

Yb-vnars700

Archive directory:

Sample directory:

FidFile: NRB-4-158-NOESY

Pulse Sequence: NOESY

Solvent: cdcl3

Data collected on: Feb 20 2013

Operator: nbabij

Relax. delay 1.000 sec

Acq. time 0.150 sec

Width 6983.2 Hz

2D Width 6983.2 Hz

4 repetitions

2 x 200 increments

OBSERVE H1, 699.7567665 MHz

DATA PROCESSING

Gauss apodization 0.069 sec

F1 DATA PROCESSING

Gauss apodization 0.026 sec

FT size 4096 x 4096

Total time 37 min

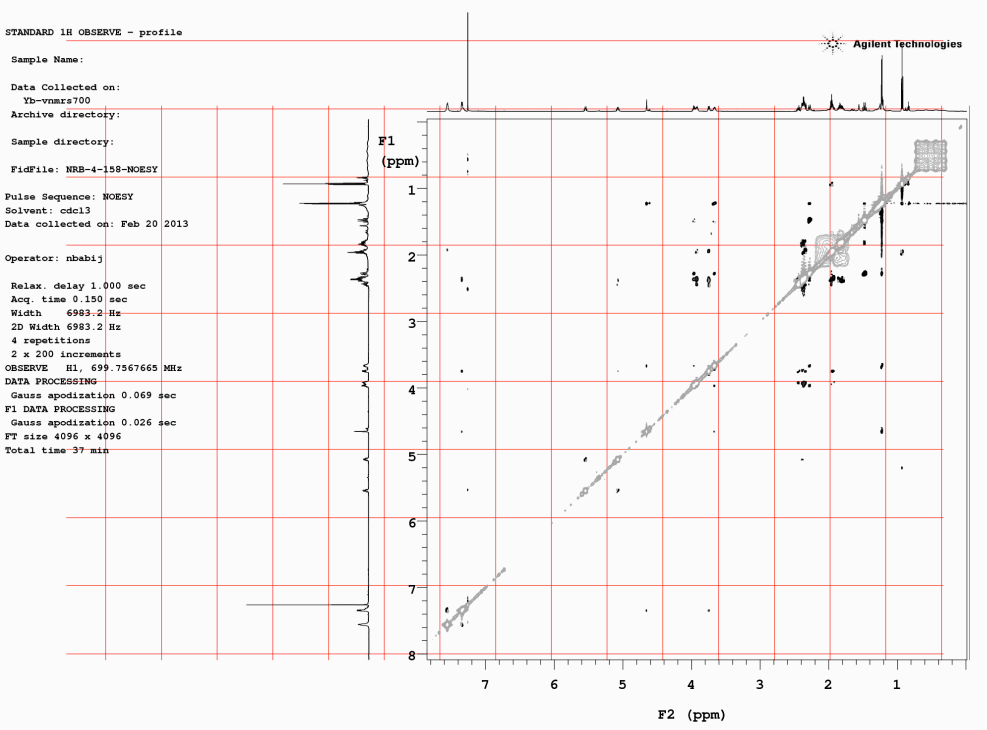

Automated Probe tuning parameter

Sample Name:

Data Collected on:  
yb.chem.lsa.umich.edu-vnmrs700

Archive directory:

Sample directory:

FidFile: NRB-5-010-1H

Pulse Sequence: PROTON (s2pul)  
Solvent: cdcl3  
Data collected on: May 26 2013

Agilent Technologies

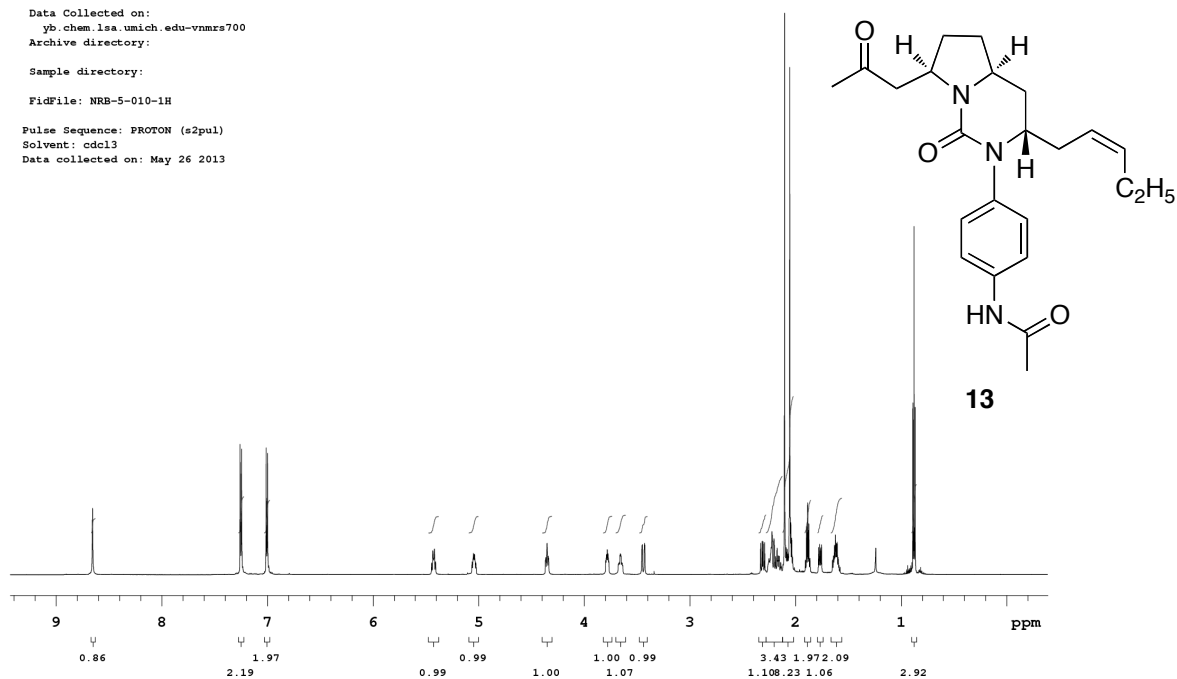

Sample Name:

Data Collected on:  
yb.chem.lsa.umich.edu-vnmrs700

Archive directory:

Sample directory:

FidFile: CARBON

Pulse Sequence: CARBON (s2pul)  
Solvent: cdcl3  
Data collected on: May 26 2013

Agilent Technologies

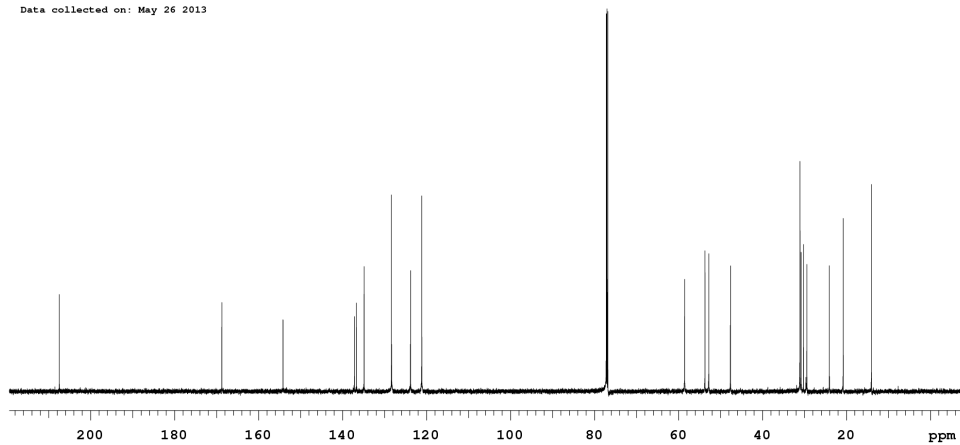

Automated Probe tuning parameter

Sample Name:

Data Collected on:  
yb.chem.lsa.umich.edu-vnmrs700  
Archive directory:

Sample directory:

FidFile: NRB-5-012-1H

Pulse Sequence: PROTON (s2pul)  
Solvent: cdcl3  
Data collected on: May 27 2013

Agilent Technologies

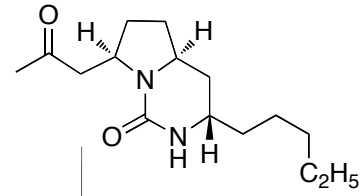

14

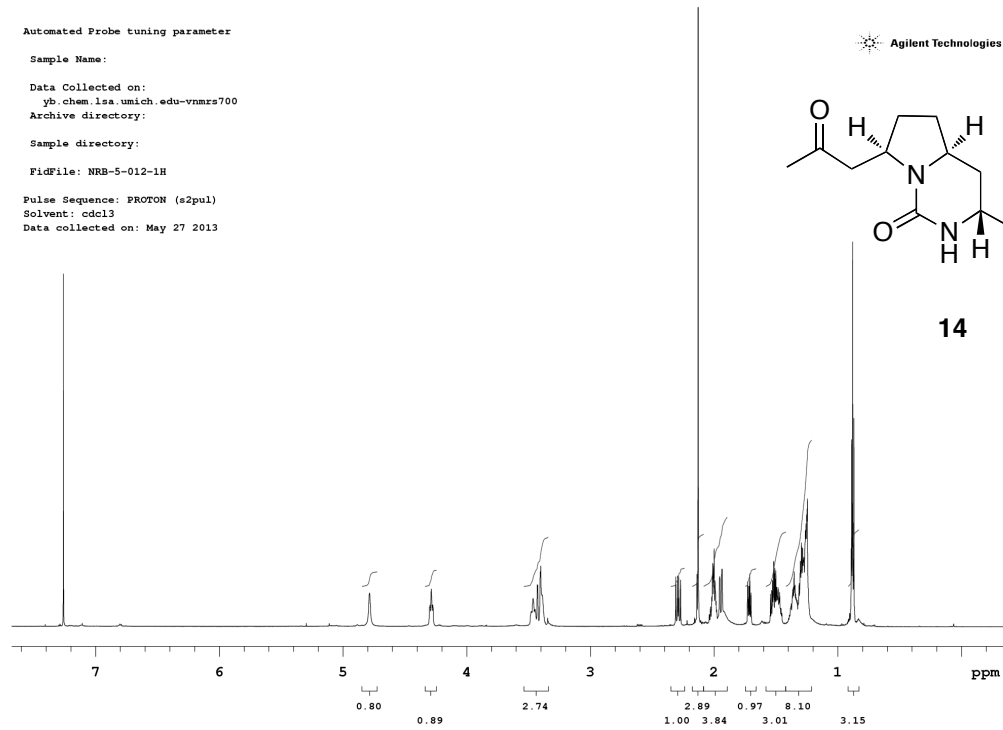

Automated Probe tuning parameter

Sample Name:

Data Collected on:  
yb.chem.lsa.umich.edu-vnmrs700  
Archive directory:

Sample directory:

FidFile: NRB-5-012-13C

Pulse Sequence: CARBON (s2pul)  
Solvent: cdcl3  
Data collected on: May 27 2013

Agilent Technologies

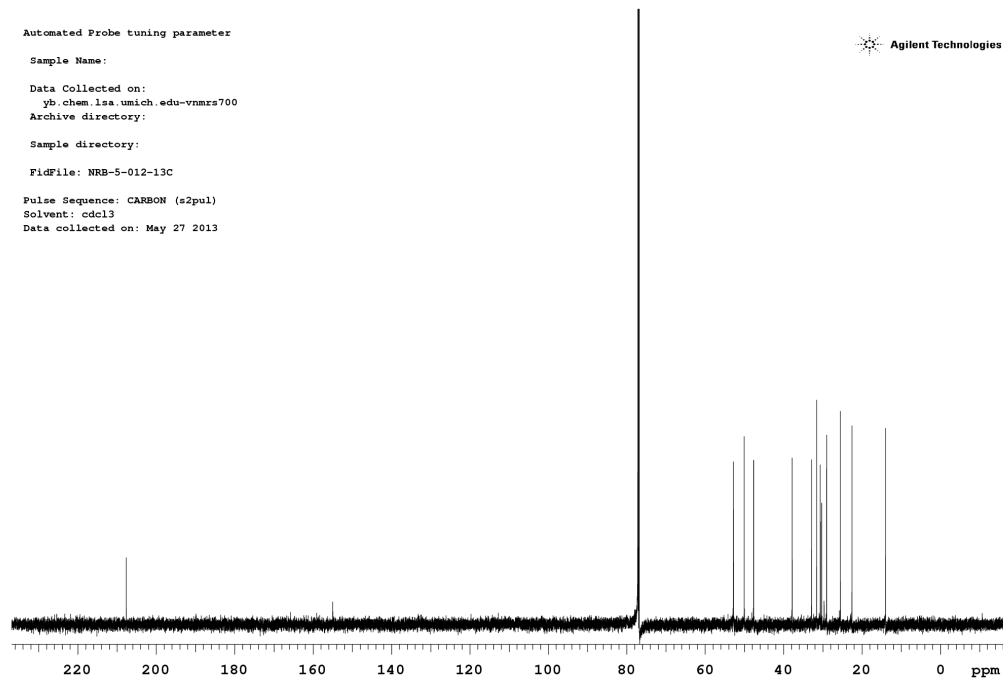

Automated Probe tuning parameter

Agilent Technologies

Sample Name:  
Data Collected on:  
yb.chem.lsa.umich.edu-vmrs700  
Archive directory:  
Sample directory:  
FidFile: NRB-5-017-1H  
Pulse Sequence: PROTON (s2pul)  
Solvent: cdcl3  
Data collected on: Jun 10 2013

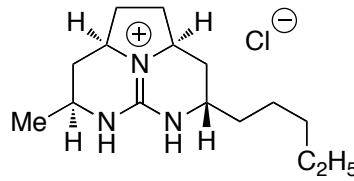

9-*epi*-Batzelladine K (16)  
CDCl<sub>3</sub>

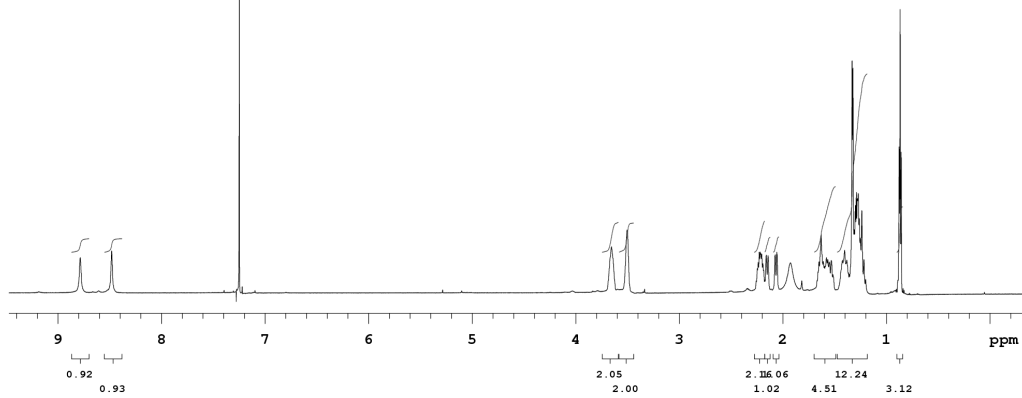

Automated Probe tuning parameter

Agilent Technologies

Sample Name:  
Data Collected on:  
yb.chem.lsa.umich.edu-vmrs700  
Archive directory:  
Sample directory:  
FidFile: NRB-5-017-13C  
Pulse Sequence: CARBON (s2pul)  
Solvent: cdcl3  
Data collected on: Jun 10 2013

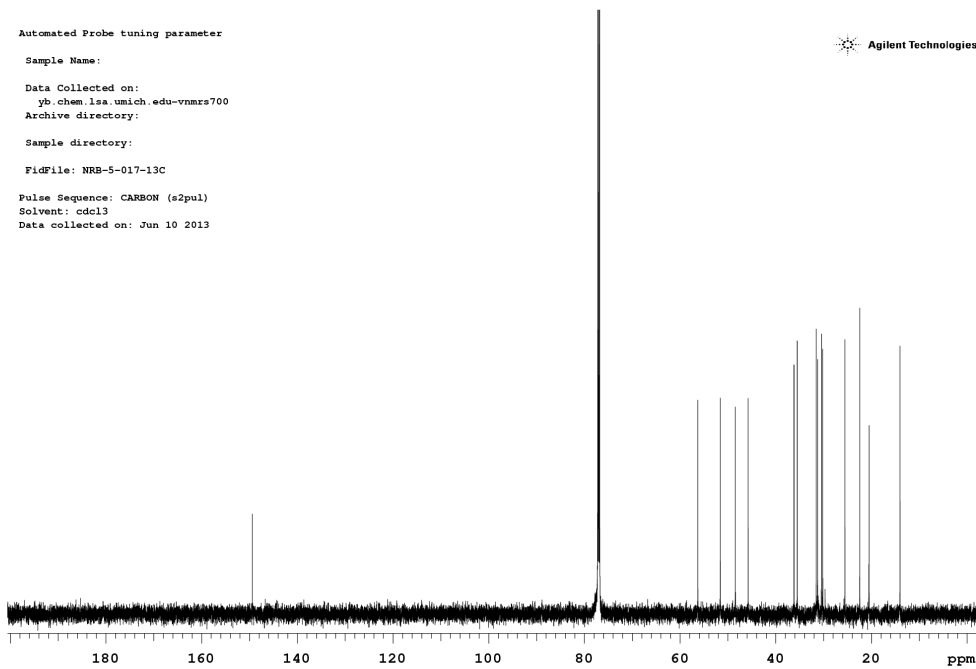



Automated Probe tuning parameter

Sample Name:  
Data Collected on:  
yb.chem.lsa.umich.edu-vnmrs700  
Archive directory:

Sample directory:  
FidFile: NRB-5-017-1H-CD3OD

Pulse Sequence: PROTON (s2pul)  
Solvent: cd3od  
Data collected on: Jun 10 2013

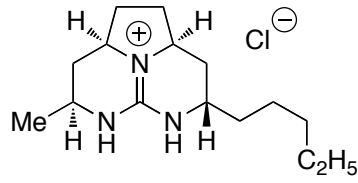

Agilent Technologies

9-*epi*-Batzelladine K (16)  
CD<sub>3</sub>OD

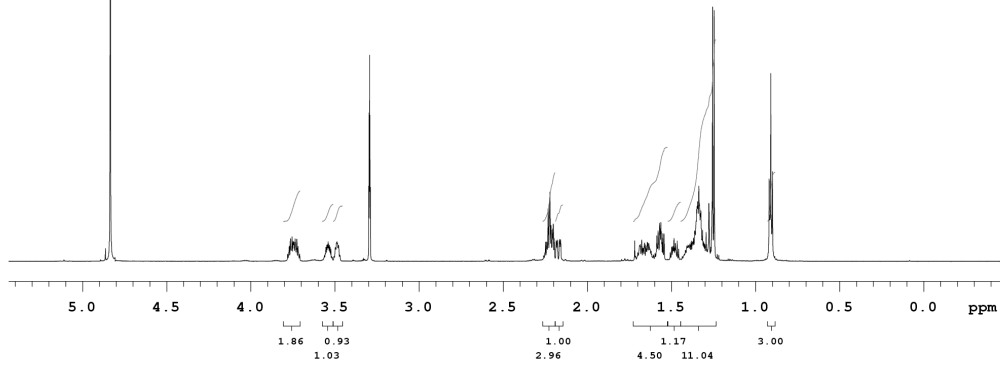

Automated Probe tuning parameter

Sample Name:  
Data Collected on:  
yb.chem.lsa.umich.edu-vnmrs700  
Archive directory:

Sample directory:  
FidFile: NRB-5-017-13C-CD3OD

Pulse Sequence: CARBON (s2pul)  
Solvent: cd3od  
Data collected on: Jun 10 2013

Agilent Technologies

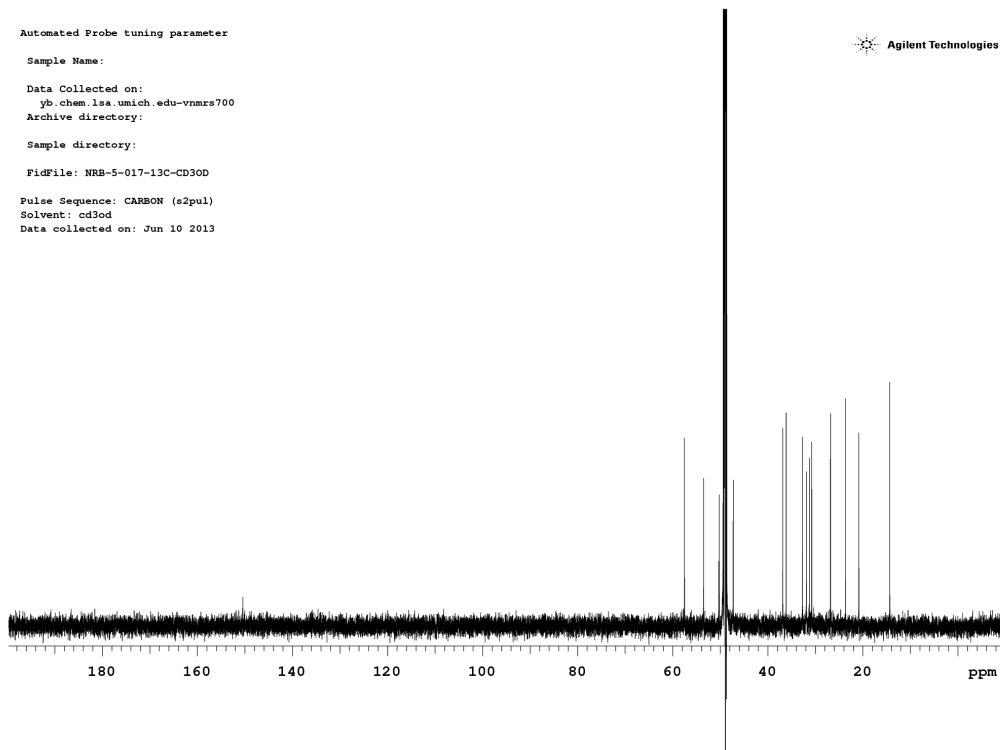

Automated Probe tuning parameter

Sample Name:  
Data Collected on:  
yb\_chem.lsa.umich.edu-vnmrs700  
Archive directory:  
Sample directory:  
FidFile: NRB-5-017-cosy  
Pulse Sequence: gCOSY  
Solvent: cd3od  
Data collected on: Jun 10 2013

Temp. 25.0 C / 298.1 K  
Operator: nbabij

Relax. delay 1.000 sec  
Acq. time 0.150 sec  
Width 3491.6 Hz  
2D Width 3491.6 Hz  
2 repetitions  
128 increments  
OBSERVE H1, 699.7595207 MHz  
DATA PROCESSING  
Sq. sine bell 0.075 sec  
F1 DATA PROCESSING  
Sq. sine bell 0.037 sec  
FT size 2048 x 2048  
Total time 5 min 44 sec

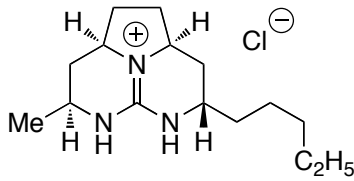

9-*epi*-Batzelladine K (16)  
CD<sub>3</sub>OD

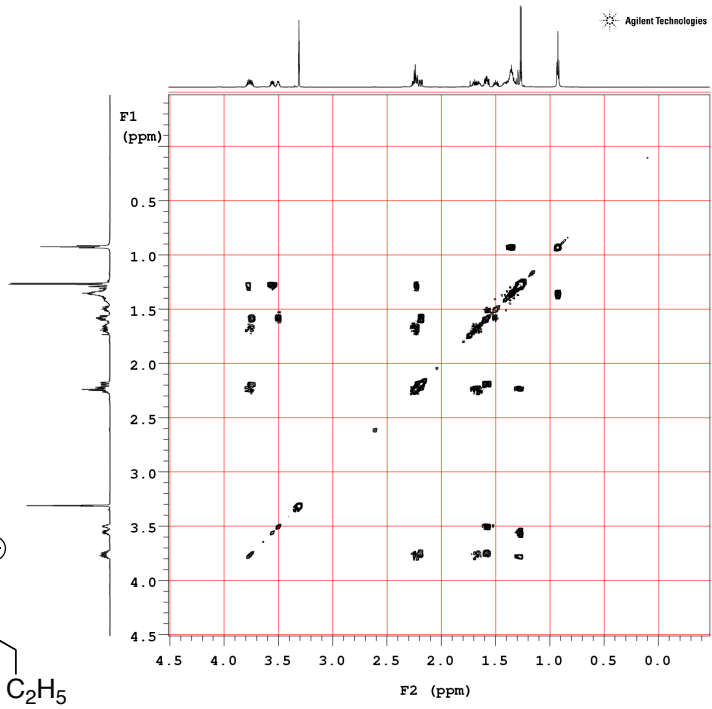

Proton Spectrum

Sample Name:  
Data Collected on:  
yb\_chem.lsa.umich.edu-vnmrs700  
Archive directory:  
Sample directory:  
FidFile: NRB-5-017-noesy  
Pulse Sequence: NOESY  
Solvent: cd3od  
Data collected on: Jun 10 2013

Temp. 25.0 C / 298.1 K  
Operator: nbabij  
Relax. delay 1.000 sec  
Acq. time 0.150 sec  
Width 11160.7 Hz  
2D Width 11160.7 Hz  
4 repetitions  
2 x 200 increments  
OBSERVE H1, 699.7595207 MHz  
DATA PROCESSING  
Gauss apodization 0.069 sec  
F1 DATA PROCESSING  
Gauss apodization 0.017 sec  
FT size 4096 x 4096  
Total time 37 min

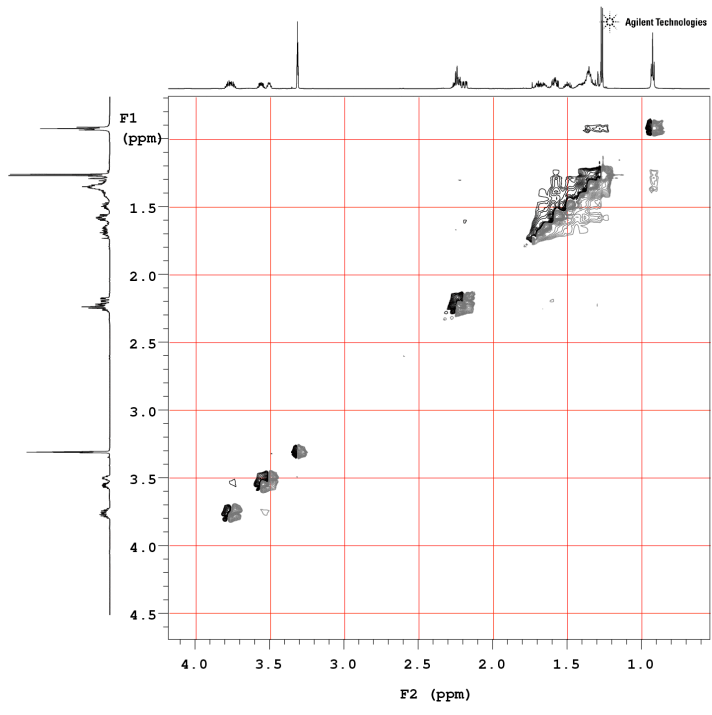

Supplement: NIHMS521630-supplement-Supporting_Information.pdf [file NIHMS521630-supplement-Supporting_Information.pdf]
